# Supplementary material for: Antiviral efficacy of favipiravir against Ebola virus: A translational study in cynomolgus macaques
Source: PLoS Med. 2018 Mar 27;15(3):e1002535. doi: 10.1371/journal.pmed.1002535 (PMC5870946; doi:10.1371/journal.pmed.1002535)
Supplement: S3 Table — No information is provided concerning the nature (synonymous/non-synonymous) of the variants between the positions 6924 and 7133. Three open reading frames constitute this part of the ORF. S, synonymous; NS, non-synonymous. (XLSX) [file pmed.1002535.s008.xlsx]

## Sheet: Feuil1
Drug concentration	Animal	Jour	Position	Minor variant frequency	Nucleotide change	transition/transversion	Location	Amino-acid change
Untreated	BB341E	5	234	0.0126135	G->A	Transition	3'	-
Untreated	BB341E	5	595	0.0125248	A->G	Transition	NP	NP: P41
Untreated	BB341E	5	2724	0.0112888	A->G	Transition	NP-VP35	-
Untreated	BB341E	5	2762	0.0218186	A->G	Transition	NP-VP35	-
Untreated	BB341E	5	3047	0.012009	C->T	Transition	NP-VP35	-
Untreated	BB341E	5	3544	0.021319	T->C	Transition	VP35	VP35 V138A
Untreated	BB341E	5	3631	0.0202637	A->G	Transition	VP35	VP35 Q167R
Untreated	BB341E	5	4900	0.010686	G->A	Transition	VP40	VP40 G140E
Untreated	BB341E	5	5504	0.0176502	G->A	Transition	VP40-GP	-
Untreated	BB341E	5	5646	0.0573254	A->G	Transition	VP40-GP	-
Untreated	BB341E	5	5817	0.0107953	T->C	Transition	VP40-GP	-
Untreated	BB341E	5	5894	0.0583876	A->G	Transition	VP40-GP	-
Untreated	BB341E	5	5980	0.0102986	T->C	Transition	VP40-GP	-
Untreated	BB341E	5	5984	0.0563082	C->T	Transition	VP40-GP	-
Untreated	BB341E	5	5992	0.0108353	T->G	Transversion	VP40-GP	-
Untreated	BB341E	5	6427	0.0156014	G->A	Transition	GP	GP R129Q
Untreated	BB341E	5	6470	0.0132321	G->A	Transition	GP	GP: T143
Untreated	BB341E	5	7668	0.0111208	C->T	Transition	GP	GP T543I
Untreated	BB341E	5	7800	0.0205003	A->G	Transition	GP	GP K587R
Untreated	BB341E	5	8172	0.180084	T->G	Transversion	GP-VP30	-
Untreated	BB341E	5	9441	0.0110531	A->C	Transversion	VP30-VP24	-
Untreated	BB341E	5	11049	0.178119	G->A	Transition	VP24	VP24: S234
Untreated	BB341E	5	12792	0.174885	T->C	Transition	L	L: I403
Untreated	BB341E	5	14317	0.0152722	T->C	Transition	L	L S912P
Untreated	BB341E	5	14589	0.0155754	T->G	Transversion	L	L: T1002
Untreated	BB341E	5	16650	0.0107381	T->C	Transition	L	L: N1689
Untreated	BB341E	5	17651	0.0124303	A->G	Transition	L	L Q2023R
Untreated	BB341E	5	18733	0.0112941	T->C	Transition	5'	-
Untreated	BB341E	7	47	0.0216686	A->G	Transition	3'	-
Untreated	BB341E	7	595	0.0121367	A->G	Transition	NP	NP: P41
Untreated	BB341E	7	1795	0.0117478	A->G	Transition	NP	NP: Q441
Untreated	BB341E	7	2762	0.0240348	A->G	Transition	NP-VP35	-
Untreated	BB341E	7	3544	0.0185765	T->C	Transition	VP35	VP35 V138A
Untreated	BB341E	7	3631	0.0176174	A->G	Transition	VP35	VP35 Q167R
Untreated	BB341E	7	5504	0.0175167	G->A	Transition	VP40-GP	-
Untreated	BB341E	7	5646	0.0569704	A->G	Transition	VP40-GP	-
Untreated	BB341E	7	5894	0.0582005	A->G	Transition	VP40-GP	-
Untreated	BB341E	7	5984	0.0569982	C->T	Transition	VP40-GP	-
Untreated	BB341E	7	6427	0.0170423	G->A	Transition	GP	GP R129Q
Untreated	BB341E	7	6470	0.0105498	G->A	Transition	GP	GP: T143
Untreated	BB341E	7	7800	0.0256274	A->G	Transition	GP	GP K587R
Untreated	BB341E	7	8172	0.209197	T->G	Transversion	GP-VP30	-
Untreated	BB341E	7	9441	0.0125645	A->C	Transversion	VP30-VP24	-
Untreated	BB341E	7	11049	0.207826	G->A	Transition	VP24	VP24: S234
Untreated	BB341E	7	11116	0.0113196	T->C	Transition	VP24-L	-
Untreated	BB341E	7	12792	0.206262	T->C	Transition	L	L: I403
Untreated	BB341E	7	14317	0.013921	T->C	Transition	L	L S912P
Untreated	BB341E	7	14589	0.0169357	T->G	Transversion	L	L: T1002
Untreated	BB341E	7	17651	0.0158181	A->G	Transition	L	L Q2023R
Untreated	BB341E	7	18733	0.0128118	T->C	Transition	5'	-
Untreated	BB341E	9	47	0.0195595	A->G	Transition	3'	-
Untreated	BB341E	9	822	0.0100671	A->G	Transition	NP	NP E117G
Untreated	BB341E	9	861	0.0105235	A->G	Transition	NP	NP K130R
Untreated	BB341E	9	2026	0.0114391	C->G	Transversion	NP	NP: G518
Untreated	BB341E	9	2158	0.0108138	A->G	Transition	NP	NP: T562
Untreated	BB341E	9	2762	0.0258181	A->G	Transition	NP-VP35	-
Untreated	BB341E	9	3149	0.0138439	C->G	Transversion	VP35	VP35: G6
Untreated	BB341E	9	3544	0.0133028	T->C	Transition	VP35	VP35 V138A
Untreated	BB341E	9	3631	0.0142202	A->G	Transition	VP35	VP35 Q167R
Untreated	BB341E	9	5504	0.0150077	G->A	Transition	VP40-GP	-
Untreated	BB341E	9	5646	0.0484219	A->G	Transition	VP40-GP	-
Untreated	BB341E	9	5894	0.0478741	A->G	Transition	VP40-GP	-
Untreated	BB341E	9	5984	0.0461583	C->T	Transition	VP40-GP	-
Untreated	BB341E	9	6114	0.0131657	C->T	Transition	GP	GP L25F
Untreated	BB341E	9	6427	0.0192163	G->A	Transition	GP	GP R129Q
Untreated	BB341E	9	7800	0.0307363	A->G	Transition	GP	GP K587R
Untreated	BB341E	9	8172	0.250133	T->G	Transversion	GP-VP30	-
Untreated	BB341E	9	9441	0.0132798	A->C	Transversion	VP30-VP24	-
Untreated	BB341E	9	11049	0.24555	G->A	Transition	VP24	VP24: S234
Untreated	BB341E	9	11116	0.0173746	T->C	Transition	VP24-L	-
Untreated	BB341E	9	11771	0.0119554	G->A	Transition	L	L S63N
Untreated	BB341E	9	12792	0.253555	T->C	Transition	L	L: I403
Untreated	BB341E	9	14589	0.0174419	T->G	Transversion	L	L: T1002
Untreated	BB341E	9	17651	0.0211392	A->G	Transition	L	L Q2023R
Untreated	BB341E	9	18530	0.0162491	T->C	Transition	5'	-
Untreated	CB819	5	47	0.0214371	A->G	Transition	3'	-
Untreated	CB819	5	2077	0.0126595	A->G	Transition	NP	NP: T535
Untreated	CB819	5	2078	0.0129368	A->G	Transition	NP	NP I536V
Untreated	CB819	5	2085	0.0136004	A->G	Transition	NP	NP H538R
Untreated	CB819	5	2109	0.0128423	A->G	Transition	NP	NP N546S
Untreated	CB819	5	2116	0.0128532	A->G	Transition	NP	NP: R548
Untreated	CB819	5	2120	0.0112904	A->G	Transition	NP	NP N550D
Untreated	CB819	5	2121	0.0112912	A->G	Transition	NP	NP N550S
Untreated	CB819	5	2125	0.0125834	A->G	Transition	NP	NP: E551
Untreated	CB819	5	2752	0.0113142	G->A	Transition	NP-VP35	-
Untreated	CB819	5	3158	0.0109876	T->C	Transition	VP35	VP35: H9
Untreated	CB819	5	3203	0.0132096	T->C	Transition	VP35	VP35: L24
Untreated	CB819	5	4305	0.0171439	T->A	Transversion	VP35-VP40	-
Untreated	CB819	5	6324	0.0271475	G->A	Transition	GP	GP V95M
Untreated	CB819	5	6424	0.0116206	T->C	Transition	GP	GP I128T
Untreated	CB819	5	7668	0.0203154	C->T	Transition	GP	GP T543I
Untreated	CB819	5	7800	0.0512079	A->G	Transition	GP	GP K587R
Untreated	CB819	5	8080	0.0119349	A->G	Transition	GP-VP30	-
Untreated	CB819	5	8373	0.0115754	A->G	Transition	GP-VP30	-
Untreated	CB819	5	9857	0.0194897	A->G	Transition	VP30-VP24	-
Untreated	CB819	5	11126	0.0188752	C->T	Transition	VP24-L	-
Untreated	CB819	5	12972	0.0101917	T->G	Transversion	L	L: L463
Untreated	CB819	5	14317	0.0171706	T->C	Transition	L	L S912P
Untreated	CB819	5	16170	0.0311487	T->C	Transition	L	L: F1529
Untreated	CB819	7	47	0.0268853	A->G	Transition	3'	-
Untreated	CB819	7	2077	0.0100652	A->G	Transition	NP	NP: T535
Untreated	CB819	7	2078	0.010168	A->G	Transition	NP	NP I536V
Untreated	CB819	7	2085	0.0116341	A->G	Transition	NP	NP H538R
Untreated	CB819	7	2109	0.0110935	A->G	Transition	NP	NP N546S
Untreated	CB819	7	2116	0.0116283	A->G	Transition	NP	NP: R548
Untreated	CB819	7	2121	0.0100161	A->G	Transition	NP	NP N550S
Untreated	CB819	7	2125	0.0111359	A->G	Transition	NP	NP: E551
Untreated	CB819	7	2281	0.0118059	C->T	Transition	NP	NP: V603
Untreated	CB819	7	2752	0.0113697	G->A	Transition	NP-VP35	-
Untreated	CB819	7	3158	0.0101776	T->C	Transition	VP35	VP35: H9
Untreated	CB819	7	3203	0.012307	T->C	Transition	VP35	VP35: L24
Untreated	CB819	7	3368	0.0102439	T->A	Transversion	VP35	VP35 N79K
Untreated	CB819	7	4305	0.0181302	T->A	Transversion	VP35-VP40	-
Untreated	CB819	7	6197	0.0152766	T->C	Transition	GP	GP: C52
Untreated	CB819	7	6324	0.0236368	G->A	Transition	GP	GP V95M
Untreated	CB819	7	6424	0.0101017	T->C	Transition	GP	GP I128T
Untreated	CB819	7	7668	0.0210004	C->T	Transition	GP	GP T543I
Untreated	CB819	7	7800	0.0491546	A->G	Transition	GP	GP K587R
Untreated	CB819	7	8080	0.0108626	A->G	Transition	GP-VP30	-
Untreated	CB819	7	8373	0.0100083	A->G	Transition	GP-VP30	-
Untreated	CB819	7	9857	0.0189219	A->G	Transition	VP30-VP24	-
Untreated	CB819	7	10193	0.0133639	A->G	Transition	VP30-VP24	-
Untreated	CB819	7	10738	0.0136232	A->C	Transversion	VP24	VP24 N131H
Untreated	CB819	7	11126	0.0180741	C->T	Transition	VP24-L	-
Untreated	CB819	7	11227	0.0144532	T->C	Transition	VP24-L	-
Untreated	CB819	7	14317	0.0121826	T->C	Transition	L	L S912P
Untreated	CB819	7	16170	0.0275678	T->C	Transition	L	L: F1529
Untreated	CB819	8	47	0.0212214	A->G	Transition	3'	-
Untreated	CB819	8	2752	0.0102158	G->A	Transition	NP-VP35	-
Untreated	CB819	8	3158	0.0120422	T->C	Transition	VP35	VP35: H9
Untreated	CB819	8	3203	0.0136164	T->C	Transition	VP35	VP35: L24
Untreated	CB819	8	3368	0.0114951	T->A	Transversion	VP35	VP35 N79K
Untreated	CB819	8	4305	0.0155097	T->A	Transversion	VP35-VP40	-
Untreated	CB819	8	6197	0.0168534	T->C	Transition	GP	GP: C52
Untreated	CB819	8	6324	0.022115	G->A	Transition	GP	GP V95M
Untreated	CB819	8	6424	0.012988	T->C	Transition	GP	GP I128T
Untreated	CB819	8	6427	0.0117286	G->A	Transition	GP	GP R129Q
Untreated	CB819	8	7668	0.0202098	C->T	Transition	GP	GP T543I
Untreated	CB819	8	7800	0.0515281	A->G	Transition	GP	GP K587R
Untreated	CB819	8	8373	0.0140707	A->G	Transition	GP-VP30	-
Untreated	CB819	8	9857	0.0161502	A->G	Transition	VP30-VP24	-
Untreated	CB819	8	10193	0.015886	A->G	Transition	VP30-VP24	-
Untreated	CB819	8	10738	0.013193	A->C	Transversion	VP24	VP24 N131H
Untreated	CB819	8	11126	0.0170489	C->T	Transition	VP24-L	-
Untreated	CB819	8	11227	0.0162433	T->C	Transition	VP24-L	-
Untreated	CB819	8	14317	0.0130062	T->C	Transition	L	L S912P
Untreated	CB819	8	16170	0.0255804	T->C	Transition	L	L: F1529
Untreated	CB979	5	47	0.018222	A->G	Transition	3'	-
Untreated	CB979	5	130	0.0114629	C->T	Transition	3'	-
Untreated	CB979	5	187	0.0110601	A->G	Transition	3'	-
Untreated	CB979	5	640	0.0104786	A->T	Transversion	NP	NP: I56
Untreated	CB979	5	749	0.0130324	G->A	Transition	NP	NP G93S
Untreated	CB979	5	1676	0.0138427	G->A	Transition	NP	NP A402T
Untreated	CB979	5	2800	0.0116402	T->C	Transition	NP-VP35	-
Untreated	CB979	5	4212	0.0135381	C->T	Transition	VP35-VP40	-
Untreated	CB979	5	5759	0.0131102	T->C	Transition	VP40-GP	-
Untreated	CB979	5	6324	0.0260305	G->A	Transition	GP	GP V95M
Untreated	CB979	5	6734	0.020868	C->T	Transition	GP	GP: Y231
Untreated	CB979	5	6934	0.0772111	A->T	Transversion	GP	-
Untreated	CB979	5	7532	0.0193445	A->G	Transition	GP	GP T498A
Untreated	CB979	5	7668	0.032837	C->T	Transition	GP	GP T543I
Untreated	CB979	5	7800	0.0428618	A->G	Transition	GP	GP K587R
Untreated	CB979	5	9444	0.0168688	T->C	Transition	VP30-VP24	-
Untreated	CB979	5	9542	0.0208077	T->C	Transition	VP30-VP24	-
Untreated	CB979	5	9544	0.0148161	T->C	Transition	VP30-VP24	-
Untreated	CB979	5	9594	0.0198563	T->C	Transition	VP30-VP24	-
Untreated	CB979	5	9646	0.112877	T->C	Transition	VP30-VP24	-
Untreated	CB979	5	13203	0.018905	A->C	Transversion	L	L: L540
Untreated	CB979	5	13239	0.0118422	A->G	Transition	L	L: K552
Untreated	CB979	5	14317	0.0107882	T->C	Transition	L	L S912P
Untreated	CB979	5	14611	0.0165004	T->G	Transversion	L	L F1010V
Untreated	CB979	5	15165	0.0589926	A->C	Transversion	L	L: G1194
Untreated	CB979	5	15627	0.0480027	T->C	Transition	L	L: T1348
Untreated	CB979	5	15816	0.0166683	T->C	Transition	L	L: D1411
Untreated	CB979	5	16108	0.0160745	C->T	Transition	L	L L1509F
Untreated	CB979	5	16170	0.0142849	T->C	Transition	L	L: F1529
Untreated	CB979	5	17121	0.0180034	A->G	Transition	L	L: K1846
Untreated	CB979	5	17127	0.0219748	A->C	Transversion	L	L Q1848H
Untreated	CB979	5	18222	0.0135272	T->C	Transition	5'	-
Untreated	CB979	5	18574	0.0105079	A->G	Transition	5'	-
Untreated	CB979	7	47	0.0403823	A->G	Transition	3'	-
Untreated	CB979	7	125	0.01601	C->T	Transition	3'	-
Untreated	CB979	7	130	0.0178312	C->T	Transition	3'	-
Untreated	CB979	7	333	0.0221191	A->G	Transition	3'	-
Untreated	CB979	7	1052	0.0392472	G->A	Transition	NP	NP G194R
Untreated	CB979	7	1287	0.172037	T->A	Transversion	NP	NP V272E
Untreated	CB979	7	1821	0.0192924	A->G	Transition	NP	NP D450G
Untreated	CB979	7	1822	0.0278969	T->C	Transition	NP	NP: D450
Untreated	CB979	7	2138	0.0192155	A->G	Transition	NP	NP T556A
Untreated	CB979	7	2146	0.0133761	T->C	Transition	NP	NP: P558
Untreated	CB979	7	2279	0.0302828	G->A	Transition	NP	NP V603I
Untreated	CB979	7	2350	0.0370452	T->C	Transition	NP	NP: D626
Untreated	CB979	7	2410	0.0109612	T->C	Transition	NP	NP: S646
Untreated	CB979	7	2421	0.0111166	T->C	Transition	NP	NP M650T
Untreated	CB979	7	2453	0.0333132	T->C	Transition	NP	NP F661L
Untreated	CB979	7	3031	0.0159761	T->C	Transition	NP-VP35	-
Untreated	CB979	7	3225	0.0189975	C->T	Transition	VP35	VP35: L32
Untreated	CB979	7	4212	0.0125034	C->T	Transition	VP35-VP40	-
Untreated	CB979	7	5759	0.0195781	T->C	Transition	VP40-GP	-
Untreated	CB979	7	6156	0.0106196	A->T	Transversion	GP	GP N39Y
Untreated	CB979	7	6181	0.0114177	T->C	Transition	GP	GP V47A
Untreated	CB979	7	6324	0.0185592	G->A	Transition	GP	GP V95M
Untreated	CB979	7	6734	0.0129995	C->T	Transition	GP	GP: Y231
Untreated	CB979	7	6934	0.0599181	A->T	Transversion	GP	-
Untreated	CB979	7	7532	0.0608575	A->G	Transition	GP	GP T498A
Untreated	CB979	7	7785	0.0242258	C->T	Transition	GP	GP S582L
Untreated	CB979	7	7800	0.0413793	A->G	Transition	GP	GP K587R
Untreated	CB979	7	8380	0.042807	A->G	Transition	GP-VP30	-
Untreated	CB979	7	8496	0.0232449	A->G	Transition	GP-VP30	-
Untreated	CB979	7	9243	0.0606265	C->T	Transition	VP30	VP30: I244
Untreated	CB979	7	9346	0.0125871	T->C	Transition	VP30	VP30 C279R
Untreated	CB979	7	9386	0.0116306	T->C	Transition	VP30-VP24	-
Untreated	CB979	7	9426	0.0118754	T->C	Transition	VP30-VP24	-
Untreated	CB979	7	9441	0.0454346	A->C	Transversion	VP30-VP24	-
Untreated	CB979	7	9444	0.0920699	T->C	Transition	VP30-VP24	-
Untreated	CB979	7	9458	0.0113138	T->C	Transition	VP30-VP24	-
Untreated	CB979	7	9465	0.010847	T->C	Transition	VP30-VP24	-
Untreated	CB979	7	9646	0.034741	T->C	Transition	VP30-VP24	-
Untreated	CB979	7	9776	0.0280354	G->T	Transversion	VP30-VP24	-
Untreated	CB979	7	10106	0.024489	T->C	Transition	VP30-VP24	-
Untreated	CB979	7	10274	0.0327444	G->A	Transition	VP30-VP24	-
Untreated	CB979	7	10330	0.0153844	A->G	Transition	VP30-VP24	-
Untreated	CB979	7	13203	0.0159088	A->C	Transversion	L	L: L540
Untreated	CB979	7	14317	0.0256482	T->C	Transition	L	L S912P
Untreated	CB979	7	14611	0.0154076	T->G	Transversion	L	L F1010V
Untreated	CB979	7	15627	0.0282937	T->C	Transition	L	L: T1348
Untreated	CB979	7	15816	0.0179957	T->C	Transition	L	L: D1411
Untreated	CB979	7	16170	0.0177318	T->C	Transition	L	L: F1529
Untreated	CB979	7	17121	0.0161527	A->G	Transition	L	L: K1846
Untreated	CB979	7	17127	0.0186266	A->C	Transversion	L	L Q1848H
Untreated	CB979	7	18222	0.0104781	T->C	Transition	5'	-
Untreated	CB979	7	18398	0.0106126	C->A	Transversion	5'	-
Untreated	CB979	7	18574	0.0157	A->G	Transition	5'	-
Untreated	CB979	9	61	0.0123861	A->G	Transition	3'	-
Untreated	CB979	9	195	0.0187564	C->T	Transition	3'	-
Untreated	CB979	9	353	0.0100756	A->G	Transition	3'	-
Untreated	CB979	9	665	0.010224	T->C	Transition	NP	NP F65L
Untreated	CB979	9	749	0.0626255	G->A	Transition	NP	NP G93S
Untreated	CB979	9	1009	0.0175191	A->G	Transition	NP	NP: A179
Untreated	CB979	9	1316	0.023858	G->A	Transition	NP	NP A282T
Untreated	CB979	9	1476	0.0129829	T->C	Transition	NP	NP V335A
Untreated	CB979	9	1807	0.0593431	G->T	Transversion	NP	NP: P445
Untreated	CB979	9	1914	0.0108198	A->G	Transition	NP	NP D481G
Untreated	CB979	9	2042	0.0129516	A->G	Transition	NP	NP R524G
Untreated	CB979	9	2328	0.0140143	T->C	Transition	NP	NP L619P
Untreated	CB979	9	3031	0.148443	T->C	Transition	NP-VP35	-
Untreated	CB979	9	3195	0.107247	C->T	Transition	VP35	VP35 P22S
Untreated	CB979	9	4537	0.383747	T->G	Transversion	VP40	VP40 V19G
Untreated	CB979	9	5487	0.01124	T->G	Transversion	VP40-GP	-
Untreated	CB979	9	5553	0.0111157	T->C	Transition	VP40-GP	-
Untreated	CB979	9	5759	0.0374049	T->C	Transition	VP40-GP	-
Untreated	CB979	9	6156	0.0146826	A->T	Transversion	GP	GP N39Y
Untreated	CB979	9	6324	0.0155877	G->A	Transition	GP	GP V95M
Untreated	CB979	9	6934	0.0811789	A->T	Transversion	GP	-
Untreated	CB979	9	7532	0.036681	A->G	Transition	GP	GP T498A
Untreated	CB979	9	7618	0.0128184	C->T	Transition	GP	GP: I526
Untreated	CB979	9	7668	0.0320189	C->T	Transition	GP	GP T543I
Untreated	CB979	9	7800	0.0734463	A->G	Transition	GP	GP K587R
Untreated	CB979	9	7876	0.0180714	T->C	Transition	GP	GP: H612
Untreated	CB979	9	7993	0.0267431	A->G	Transition	GP	GP I651M
Untreated	CB979	9	9123	0.0138753	A->G	Transition	VP30	VP30: E204
Untreated	CB979	9	9444	0.0301977	T->C	Transition	VP30-VP24	-
Untreated	CB979	9	9458	0.010404	T->C	Transition	VP30-VP24	-
Untreated	CB979	9	9646	0.09284	T->C	Transition	VP30-VP24	-
Untreated	CB979	9	9853	0.0121176	A->G	Transition	VP30-VP24	-
Untreated	CB979	9	10230	0.0107506	A->T	Transversion	VP30-VP24	-
Untreated	CB979	9	11315	0.0110707	T->C	Transition	VP24-L	-
Untreated	CB979	9	13203	0.020667	A->C	Transversion	L	L: L540
Untreated	CB979	9	13239	0.0167534	A->G	Transition	L	L: K552
Untreated	CB979	9	13825	0.0100268	T->C	Transition	L	L: L748
Untreated	CB979	9	14469	0.0158034	T->G	Transversion	L	L I962M
Untreated	CB979	9	15243	0.0123217	A->G	Transition	L	L: E1220
Untreated	CB979	9	15590	0.0211005	C->T	Transition	L	L T1336I
Untreated	CB979	9	15627	0.0179482	T->C	Transition	L	L: T1348
Untreated	CB979	9	15816	0.0228633	T->C	Transition	L	L: D1411
Untreated	CB979	9	16170	0.0162254	T->C	Transition	L	L: F1529
Untreated	CB979	9	17121	0.0179878	A->G	Transition	L	L: K1846
Untreated	CB979	9	17127	0.0143881	A->C	Transversion	L	L Q1848H
Untreated	CB979	9	18003	0.0105629	A->G	Transition	L	L: L2140
Untreated	CB979	9	18126	0.0167627	T->C	Transition	L	L: Y2181
Untreated	CB979	9	18222	0.0160978	T->C	Transition	5'	-
Untreated	CB979	9	18574	0.0221575	A->G	Transition	5'	-
Untreated	CCB120	5	47	0.0103093	A->G	Transition	3'	-
Untreated	CCB120	5	47	0.0103093	A->G	Transition	3'	-
Untreated	CCB120	5	361	0.0100262	T->C	Transition	3'	-
Untreated	CCB120	5	361	0.0100262	T->C	Transition	3'	-
Untreated	CCB120	5	460	0.0124511	A->G	Transition	3'	-
Untreated	CCB120	5	460	0.0124511	A->G	Transition	3'	-
Untreated	CCB120	5	859	0.0118119	T->C	Transition	NP	NP: I129
Untreated	CCB120	5	859	0.0118119	T->C	Transition	NP	NP: I129
Untreated	CCB120	5	1590	0.0417362	A->G	Transition	NP	NP K373R
Untreated	CCB120	5	1590	0.0417331	A->G	Transition	NP	NP K373R
Untreated	CCB120	5	2715	0.0205775	T->G	Transversion	NP-VP35	-
Untreated	CCB120	5	2715	0.0205761	T->G	Transversion	NP-VP35	-
Untreated	CCB120	5	3003	0.0230109	G->A	Transition	NP-VP35	-
Untreated	CCB120	5	3003	0.0230109	G->A	Transition	NP-VP35	-
Untreated	CCB120	5	3926	0.0152806	C->T	Transition	VP35	VP35: S265
Untreated	CCB120	5	3926	0.0152806	C->T	Transition	VP35	VP35: S265
Untreated	CCB120	5	4589	0.026395	G->A	Transition	VP40	VP40: L36
Untreated	CCB120	5	4589	0.026395	G->A	Transition	VP40	VP40: L36
Untreated	CCB120	5	4736	0.0152429	A->G	Transition	VP40	VP40: K85
Untreated	CCB120	5	4736	0.0152429	A->G	Transition	VP40	VP40: K85
Untreated	CCB120	5	4959	0.0873117	T->C	Transition	VP40	VP40 F160L
Untreated	CCB120	5	4959	0.0873117	T->C	Transition	VP40	VP40 F160L
Untreated	CCB120	5	6119	0.0239655	C->T	Transition	GP	GP: F26
Untreated	CCB120	5	6119	0.0239655	C->T	Transition	GP	GP: F26
Untreated	CCB120	5	6424	0.0108325	T->C	Transition	GP	GP I128T
Untreated	CCB120	5	6424	0.0108325	T->C	Transition	GP	GP I128T
Untreated	CCB120	5	7607	0.0189533	G->A	Transition	GP	GP G523S
Untreated	CCB120	5	7607	0.0179765	G->A	Transition	GP	GP G523S
Untreated	CCB120	5	7668	0.0560895	C->T	Transition	GP	GP T543I
Untreated	CCB120	5	7668	0.0506102	C->T	Transition	GP	GP T543I
Untreated	CCB120	5	7800	0.0226567	A->G	Transition	GP	GP K587R
Untreated	CCB120	5	7800	0.022526	A->G	Transition	GP	GP K587R
Untreated	CCB120	5	8094	0.0111671	A->G	Transition	GP-VP30	-
Untreated	CCB120	5	8094	0.0105968	A->G	Transition	GP-VP30	-
Untreated	CCB120	5	8656	0.012419	G->A	Transition	VP30	VP30 V49I
Untreated	CCB120	5	8656	0.0120842	G->A	Transition	VP30	VP30 V49I
Untreated	CCB120	5	8736	0.0104167	A->G	Transition	VP30	VP30: K75
Untreated	CCB120	5	8738	0.0106383	A->G	Transition	VP30	VP30 K76R
Untreated	CCB120	5	8740	0.0107527	G->A	Transition	VP30	VP30 G77R
Untreated	CCB120	5	8749	0.0108696	T->C	Transition	VP30	VP30 C80R
Untreated	CCB120	5	8761	0.0105263	T->C	Transition	VP30	VP30 F84L
Untreated	CCB120	5	8763	0.0206186	T->G	Transversion	VP30	VP30 F84L
Untreated	CCB120	5	9444	0.0109995	T->C	Transition	VP30-VP24	-
Untreated	CCB120	5	9444	0.0108923	T->C	Transition	VP30-VP24	-
Untreated	CCB120	5	9482	0.0211197	T->C	Transition	VP30-VP24	-
Untreated	CCB120	5	9482	0.0206542	T->C	Transition	VP30-VP24	-
Untreated	CCB120	5	10230	0.0170849	A->T	Transversion	VP30-VP24	-
Untreated	CCB120	5	11189	0.0172559	A->G	Transition	VP24-L	-
Untreated	CCB120	5	11189	0.0172559	A->G	Transition	VP24-L	-
Untreated	CCB120	5	11209	0.0124322	A->G	Transition	VP24-L	-
Untreated	CCB120	5	11209	0.0124322	A->G	Transition	VP24-L	-
Untreated	CCB120	5	11239	0.0601975	T->C	Transition	VP24-L	-
Untreated	CCB120	5	11239	0.0601975	T->C	Transition	VP24-L	-
Untreated	CCB120	5	11799	0.0156948	A->G	Transition	L	L I72M
Untreated	CCB120	5	11799	0.0156948	A->G	Transition	L	L I72M
Untreated	CCB120	5	11941	0.016116	G->A	Transition	L	L V120M
Untreated	CCB120	5	11941	0.016116	G->A	Transition	L	L V120M
Untreated	CCB120	5	11978	0.0160174	A->G	Transition	L	L Q132R
Untreated	CCB120	5	11978	0.0160174	A->G	Transition	L	L Q132R
Untreated	CCB120	5	13506	0.0174073	T->C	Transition	L	L: Y641
Untreated	CCB120	5	13506	0.0174073	T->C	Transition	L	L: Y641
Untreated	CCB120	5	13926	0.0180248	C->A	Transversion	L	L: A781
Untreated	CCB120	5	13926	0.0180248	C->A	Transversion	L	L: A781
Untreated	CCB120	5	14317	0.014029	T->C	Transition	L	L S912P
Untreated	CCB120	5	14317	0.014029	T->C	Transition	L	L S912P
Untreated	CCB120	5	14343	0.0159282	C->T	Transition	L	L: F920
Untreated	CCB120	5	14343	0.0159282	C->T	Transition	L	L: F920
Untreated	CCB120	5	16137	0.0100068	T->C	Transition	L	L: V1518
Untreated	CCB120	5	16303	0.0156606	T->C	Transition	L	L: L1574
Untreated	CCB120	5	16303	0.0156606	T->C	Transition	L	L: L1574
Untreated	CCB120	5	16780	0.0268831	G->T	Transversion	L	L D1733Y
Untreated	CCB120	5	16780	0.0268831	G->T	Transversion	L	L D1733Y
Untreated	CCB120	5	17045	0.0164687	G->T	Transversion	L	L W1821L
Untreated	CCB120	5	17045	0.0164687	G->T	Transversion	L	L W1821L
Untreated	CCB120	5	17528	0.0398303	C->T	Transition	L	L A1982V
Untreated	CCB120	5	17604	0.0115336	A->G	Transition	L	L: L2007
Untreated	CCB120	5	17604	0.0115336	A->G	Transition	L	L: L2007
Untreated	CCB120	5	17753	0.0173646	G->A	Transition	L	L R2057H
Untreated	CCB120	5	17753	0.0173646	G->A	Transition	L	L R2057H
Untreated	CCB120	5	18420	0.0105231	G->A	Transition	5'	-
Untreated	CCB120	5	18420	0.0105231	G->A	Transition	5'	-
Untreated	CCB120	5	18574	0.0115617	A->G	Transition	5'	-
Untreated	CCB120	5	18574	0.0115617	A->G	Transition	5'	-
Untreated	CCB120	5	18868	0.0103383	G->A	Transition	5'	-
Untreated	CCB120	7	47	0.0189782	A->G	Transition	3'	-
Untreated	CCB120	7	391	0.0154856	A->G	Transition	3'	-
Untreated	CCB120	7	460	0.01019	A->G	Transition	3'	-
Untreated	CCB120	7	1288	0.0145025	A->T	Transversion	NP	NP: V272
Untreated	CCB120	7	1590	0.0279531	A->G	Transition	NP	NP K373R
Untreated	CCB120	7	2715	0.023014	T->G	Transversion	NP-VP35	-
Untreated	CCB120	7	3003	0.0150316	G->A	Transition	NP-VP35	-
Untreated	CCB120	7	3926	0.0124699	C->T	Transition	VP35	VP35: S265
Untreated	CCB120	7	4589	0.0272504	G->A	Transition	VP40	VP40: L36
Untreated	CCB120	7	4736	0.0169143	A->G	Transition	VP40	VP40: K85
Untreated	CCB120	7	4959	0.0903036	T->C	Transition	VP40	VP40 F160L
Untreated	CCB120	7	6119	0.0227954	C->T	Transition	GP	GP: F26
Untreated	CCB120	7	6424	0.0140426	T->C	Transition	GP	GP I128T
Untreated	CCB120	7	7607	0.0150612	G->A	Transition	GP	GP G523S
Untreated	CCB120	7	7668	0.0394805	C->T	Transition	GP	GP T543I
Untreated	CCB120	7	7800	0.0220338	A->G	Transition	GP	GP K587R
Untreated	CCB120	7	8656	0.0109314	G->A	Transition	VP30	VP30 V49I
Untreated	CCB120	7	9482	0.0162581	T->C	Transition	VP30-VP24	-
Untreated	CCB120	7	9491	0.010193	T->C	Transition	VP30-VP24	-
Untreated	CCB120	7	11189	0.0174	A->G	Transition	VP24-L	-
Untreated	CCB120	7	11209	0.0141056	A->G	Transition	VP24-L	-
Untreated	CCB120	7	11239	0.0432746	T->C	Transition	VP24-L	-
Untreated	CCB120	7	11941	0.0163988	G->A	Transition	L	L V120M
Untreated	CCB120	7	11978	0.0144659	A->G	Transition	L	L Q132R
Untreated	CCB120	7	13506	0.0181694	T->C	Transition	L	L: Y641
Untreated	CCB120	7	13926	0.0198494	C->A	Transversion	L	L: A781
Untreated	CCB120	7	14199	0.0113115	A->G	Transition	L	L: Q872
Untreated	CCB120	7	14317	0.0224923	T->C	Transition	L	L S912P
Untreated	CCB120	7	14343	0.0210158	C->T	Transition	L	L: F920
Untreated	CCB120	7	16137	0.0103934	T->C	Transition	L	L: V1518
Untreated	CCB120	7	16303	0.0129552	T->C	Transition	L	L: L1574
Untreated	CCB120	7	16780	0.0284579	G->T	Transversion	L	L D1733Y
Untreated	CCB120	7	17045	0.0160936	G->T	Transversion	L	L W1821L
Untreated	CCB120	7	17753	0.0168449	G->A	Transition	L	L R2057H
Untreated	CCB120	7	18574	0.0103814	A->G	Transition	5'	-
Untreated	CCB125	5	367	0.01636	A->C	Transversion	3'	-
Untreated	CCB125	5	1102	0.0496473	A->G	Transition	NP	NP: K210
Untreated	CCB125	5	1976	0.0570734	A->G	Transition	NP	NP T502A
Untreated	CCB125	5	2219	0.0105615	C->T	Transition	NP	NP P583S
Untreated	CCB125	5	2623	0.0659069	A->G	Transition	NP	NP: Q717
Untreated	CCB125	5	2865	0.0134542	A->G	Transition	NP-VP35	-
Untreated	CCB125	5	3512	0.0246355	C->T	Transition	VP35	VP35: I127
Untreated	CCB125	5	4116	0.0622147	C->T	Transition	VP35	VP35 L329F
Untreated	CCB125	5	4139	0.0506674	A->G	Transition	VP35	VP35: G336
Untreated	CCB125	5	4325	0.0575029	G->A	Transition	VP35-VP40	-
Untreated	CCB125	5	4364	0.0565925	G->A	Transition	VP35-VP40	-
Untreated	CCB125	5	4557	0.0149525	G->A	Transition	VP40	VP40 A26T
Untreated	CCB125	5	5137	0.0125584	A->C	Transversion	VP40	VP40 N219T
Untreated	CCB125	5	5348	0.0143645	A->G	Transition	VP40	VP40: P289
Untreated	CCB125	5	5597	0.0117283	T->C	Transition	VP40-GP	-
Untreated	CCB125	5	6006	0.0147068	T->G	Transversion	VP40-GP	-
Untreated	CCB125	5	6329	0.0710333	C->T	Transition	GP	GP: V96
Untreated	CCB125	5	7668	0.105686	C->T	Transition	GP	GP T543I
Untreated	CCB125	5	7800	0.0882766	A->G	Transition	GP	GP K587R
Untreated	CCB125	5	9578	0.0935223	A->G	Transition	VP30-VP24	-
Untreated	CCB125	5	9761	0.0607206	T->C	Transition	VP30-VP24	-
Untreated	CCB125	5	9940	0.0453345	C->T	Transition	VP30-VP24	-
Untreated	CCB125	5	10674	0.043844	T->C	Transition	VP24	VP24: S109
Untreated	CCB125	5	10760	0.0540862	A->C	Transversion	VP24	VP24 Q138P
Untreated	CCB125	5	10974	0.117282	C->T	Transition	VP24	VP24: N209
Untreated	CCB125	5	11141	0.0168076	T->G	Transversion	VP24-L	-
Untreated	CCB125	5	11316	0.0289714	T->C	Transition	VP24-L	-
Untreated	CCB125	5	11430	0.0697709	T->C	Transition	VP24-L	-
Untreated	CCB125	5	11474	0.0676158	T->C	Transition	VP24-L	-
Untreated	CCB125	5	11791	0.0463971	T->C	Transition	L	L: L70
Untreated	CCB125	5	11938	0.104618	A->G	Transition	L	L N119D
Untreated	CCB125	5	12204	0.0137299	T->C	Transition	L	L: A207
Untreated	CCB125	5	13272	0.0261258	A->G	Transition	L	L: G563
Untreated	CCB125	5	14229	0.0177553	T->C	Transition	L	L: F882
Untreated	CCB125	5	14317	0.0247683	T->C	Transition	L	L S912P
Untreated	CCB125	5	15774	0.0115936	C->T	Transition	L	L: N1397
Untreated	CCB125	5	16170	0.0402688	T->C	Transition	L	L: F1529
Untreated	CCB125	5	16264	0.0470515	A->G	Transition	L	L I1561V
Untreated	CCB125	5	17424	0.0302521	A->G	Transition	L	L: L1947
Untreated	CCB125	7	367	0.0160544	A->C	Transversion	3'	-
Untreated	CCB125	7	1102	0.0668594	A->G	Transition	NP	NP: K210
Untreated	CCB125	7	1976	0.0696974	A->G	Transition	NP	NP T502A
Untreated	CCB125	7	2219	0.0113768	C->T	Transition	NP	NP P583S
Untreated	CCB125	7	2623	0.0619486	A->G	Transition	NP	NP: Q717
Untreated	CCB125	7	2865	0.0133412	A->G	Transition	NP-VP35	-
Untreated	CCB125	7	3512	0.0237853	C->T	Transition	VP35	VP35: I127
Untreated	CCB125	7	4116	0.0597839	C->T	Transition	VP35	VP35 L329F
Untreated	CCB125	7	4139	0.0544926	A->G	Transition	VP35	VP35: G336
Untreated	CCB125	7	4325	0.0546431	G->A	Transition	VP35-VP40	-
Untreated	CCB125	7	4364	0.0579274	G->A	Transition	VP35-VP40	-
Untreated	CCB125	7	4557	0.0145467	G->A	Transition	VP40	VP40 A26T
Untreated	CCB125	7	5348	0.0108805	A->G	Transition	VP40	VP40: P289
Untreated	CCB125	7	5597	0.0102758	T->C	Transition	VP40-GP	-
Untreated	CCB125	7	6006	0.011627	T->G	Transversion	VP40-GP	-
Untreated	CCB125	7	6329	0.0670147	C->T	Transition	GP	GP: V96
Untreated	CCB125	7	7668	0.0999876	C->T	Transition	GP	GP T543I
Untreated	CCB125	7	7800	0.1033	A->G	Transition	GP	GP K587R
Untreated	CCB125	7	9578	0.0917117	A->G	Transition	VP30-VP24	-
Untreated	CCB125	7	9761	0.0607203	T->C	Transition	VP30-VP24	-
Untreated	CCB125	7	9940	0.049825	C->T	Transition	VP30-VP24	-
Untreated	CCB125	7	10674	0.043155	T->C	Transition	VP24	VP24: S109
Untreated	CCB125	7	10760	0.0694782	A->C	Transversion	VP24	VP24 Q138P
Untreated	CCB125	7	10974	0.106772	C->T	Transition	VP24	VP24: N209
Untreated	CCB125	7	11141	0.015388	T->G	Transversion	VP24-L	-
Untreated	CCB125	7	11316	0.0320906	T->C	Transition	VP24-L	-
Untreated	CCB125	7	11430	0.0639556	T->C	Transition	VP24-L	-
Untreated	CCB125	7	11474	0.063368	T->C	Transition	VP24-L	-
Untreated	CCB125	7	11791	0.0437652	T->C	Transition	L	L: L70
Untreated	CCB125	7	11938	0.100802	A->G	Transition	L	L N119D
Untreated	CCB125	7	12204	0.0131779	T->C	Transition	L	L: A207
Untreated	CCB125	7	13272	0.0251248	A->G	Transition	L	L: G563
Untreated	CCB125	7	14229	0.0156313	T->C	Transition	L	L: F882
Untreated	CCB125	7	14317	0.0285431	T->C	Transition	L	L S912P
Untreated	CCB125	7	16170	0.0426815	T->C	Transition	L	L: F1529
Untreated	CCB125	7	16264	0.0533826	A->G	Transition	L	L I1561V
Untreated	CCB125	7	17424	0.0314109	A->G	Transition	L	L: L1947
Untreated	CCB125	9	367	0.01865	A->C	Transversion	3'	-
Untreated	CCB125	9	1102	0.050215	A->G	Transition	NP	NP: K210
Untreated	CCB125	9	1976	0.0649464	A->G	Transition	NP	NP T502A
Untreated	CCB125	9	2623	0.0595589	A->G	Transition	NP	NP: Q717
Untreated	CCB125	9	2865	0.0121783	A->G	Transition	NP-VP35	-
Untreated	CCB125	9	3512	0.023355	C->T	Transition	VP35	VP35: I127
Untreated	CCB125	9	4116	0.0632111	C->T	Transition	VP35	VP35 L329F
Untreated	CCB125	9	4139	0.044096	A->G	Transition	VP35	VP35: G336
Untreated	CCB125	9	4212	0.0109137	C->T	Transition	VP35-VP40	-
Untreated	CCB125	9	4325	0.060942	G->A	Transition	VP35-VP40	-
Untreated	CCB125	9	4364	0.0590578	G->A	Transition	VP35-VP40	-
Untreated	CCB125	9	4557	0.0142613	G->A	Transition	VP40	VP40 A26T
Untreated	CCB125	9	5348	0.0142502	A->G	Transition	VP40	VP40: P289
Untreated	CCB125	9	6006	0.0104749	T->G	Transversion	VP40-GP	-
Untreated	CCB125	9	6179	0.0462213	T->C	Transition	GP	GP: D46
Untreated	CCB125	9	6184	0.0486522	A->G	Transition	GP	GP D48G
Untreated	CCB125	9	6329	0.0733888	C->T	Transition	GP	GP: V96
Untreated	CCB125	9	7668	0.0956004	C->T	Transition	GP	GP T543I
Untreated	CCB125	9	7800	0.118711	A->G	Transition	GP	GP K587R
Untreated	CCB125	9	9578	0.0796827	A->G	Transition	VP30-VP24	-
Untreated	CCB125	9	9761	0.0540861	T->C	Transition	VP30-VP24	-
Untreated	CCB125	9	9940	0.0473642	C->T	Transition	VP30-VP24	-
Untreated	CCB125	9	10674	0.0390024	T->C	Transition	VP24	VP24: S109
Untreated	CCB125	9	10760	0.0791988	A->C	Transversion	VP24	VP24 Q138P
Untreated	CCB125	9	10974	0.102436	C->T	Transition	VP24	VP24: N209
Untreated	CCB125	9	11141	0.0170556	T->G	Transversion	VP24-L	-
Untreated	CCB125	9	11316	0.0365183	T->C	Transition	VP24-L	-
Untreated	CCB125	9	11430	0.069037	T->C	Transition	VP24-L	-
Untreated	CCB125	9	11474	0.0694451	T->C	Transition	VP24-L	-
Untreated	CCB125	9	11791	0.040226	T->C	Transition	L	L: L70
Untreated	CCB125	9	11938	0.0954909	A->G	Transition	L	L N119D
Untreated	CCB125	9	12204	0.0146728	T->C	Transition	L	L: A207
Untreated	CCB125	9	13272	0.0264794	A->G	Transition	L	L: G563
Untreated	CCB125	9	14229	0.0126508	T->C	Transition	L	L: F882
Untreated	CCB125	9	14317	0.0451272	T->C	Transition	L	L S912P
Untreated	CCB125	9	15774	0.0123703	C->T	Transition	L	L: N1397
Untreated	CCB125	9	16170	0.0414162	T->C	Transition	L	L: F1529
Untreated	CCB125	9	16264	0.053845	A->G	Transition	L	L I1561V
Untreated	CCB125	9	17424	0.0382445	A->G	Transition	L	L: L1947
Untreated	CCC017	5	47	0.0289898	A->G	Transition	3'	-
Untreated	CCC017	5	249	0.020664	C->T	Transition	3'	-
Untreated	CCC017	5	622	0.012982	A->G	Transition	NP	NP: E50
Untreated	CCC017	5	2209	0.0155836	T->C	Transition	NP	NP: S579
Untreated	CCC017	5	2654	0.0398753	A->G	Transition	NP	NP N728D
Untreated	CCC017	5	2841	0.0161668	T->C	Transition	NP-VP35	-
Untreated	CCC017	5	3709	0.0152104	A->G	Transition	VP35	VP35 Q193R
Untreated	CCC017	5	6365	0.134565	C->T	Transition	GP	GP: Y108
Untreated	CCC017	5	6622	0.023171	G->A	Transition	GP	GP S194N
Untreated	CCC017	5	7668	0.0208052	C->T	Transition	GP	GP T543I
Untreated	CCC017	5	7800	0.0369804	A->G	Transition	GP	GP K587R
Untreated	CCC017	5	8493	0.015745	T->C	Transition	GP-VP30	-
Untreated	CCC017	5	9413	0.0109603	T->C	Transition	VP30-VP24	-
Untreated	CCC017	5	9633	0.0391229	T->C	Transition	VP30-VP24	-
Untreated	CCC017	5	14317	0.0146866	T->C	Transition	L	L S912P
Untreated	CCC017	5	14581	0.0110912	A->G	Transition	L	L I1000V
Untreated	CCC017	5	16170	0.0179911	T->C	Transition	L	L: F1529
Untreated	CCC017	5	16838	0.0285293	G->A	Transition	L	L G1752D
Untreated	CCC017	5	18343	0.0164709	C->T	Transition	5'	-
Untreated	CCC017	7	47	0.0299523	A->G	Transition	3'	-
Untreated	CCC017	7	1814	0.0451373	T->C	Transition	NP	NP S448P
Untreated	CCC017	7	2209	0.0275165	T->C	Transition	NP	NP: S579
Untreated	CCC017	7	2654	0.0637023	A->G	Transition	NP	NP N728D
Untreated	CCC017	7	2841	0.0183132	T->C	Transition	NP-VP35	-
Untreated	CCC017	7	3709	0.0205621	A->G	Transition	VP35	VP35 Q193R
Untreated	CCC017	7	4174	0.0426785	A->G	Transition	VP35-VP40	-
Untreated	CCC017	7	4212	0.0115946	C->T	Transition	VP35-VP40	-
Untreated	CCC017	7	6291	0.0434453	A->C	Transversion	GP	GP: R84
Untreated	CCC017	7	6365	0.179859	C->T	Transition	GP	GP: Y108
Untreated	CCC017	7	6622	0.0290704	G->A	Transition	GP	GP S194N
Untreated	CCC017	7	6883	0.0120548	A->G	Transition	GP	GP D281G
Untreated	CCC017	7	7668	0.0135327	C->T	Transition	GP	GP T543I
Untreated	CCC017	7	7800	0.0319072	A->G	Transition	GP	GP K587R
Untreated	CCC017	7	8493	0.0164834	T->C	Transition	GP-VP30	-
Untreated	CCC017	7	9413	0.0116903	T->C	Transition	VP30-VP24	-
Untreated	CCC017	7	9633	0.0543343	T->C	Transition	VP30-VP24	-
Untreated	CCC017	7	10269	0.0104176	T->C	Transition	VP30-VP24	-
Untreated	CCC017	7	11414	0.0105853	T->C	Transition	VP24-L	-
Untreated	CCC017	7	12148	0.01032	T->C	Transition	L	L F189L
Untreated	CCC017	7	16170	0.0210431	T->C	Transition	L	L: F1529
Untreated	CCC017	7	16448	0.0111673	A->C	Transversion	L	L N1622T
Untreated	CCC017	7	16838	0.0292981	G->A	Transition	L	L G1752D
Untreated	CCC017	7	18343	0.0202637	C->T	Transition	5'	-
Untreated	CCC017	9	47	0.0521114	A->G	Transition	3'	-
Untreated	CCC017	9	1204	0.0151996	G->A	Transition	NP	NP: L244
Untreated	CCC017	9	1814	0.165059	T->C	Transition	NP	NP S448P
Untreated	CCC017	9	2209	0.0316796	T->C	Transition	NP	NP: S579
Untreated	CCC017	9	2654	0.0756985	A->G	Transition	NP	NP N728D
Untreated	CCC017	9	2841	0.0151987	T->C	Transition	NP-VP35	-
Untreated	CCC017	9	3709	0.0169591	A->G	Transition	VP35	VP35 Q193R
Untreated	CCC017	9	4174	0.131077	A->G	Transition	VP35-VP40	-
Untreated	CCC017	9	4212	0.0108151	C->T	Transition	VP35-VP40	-
Untreated	CCC017	9	5852	0.0100725	T->C	Transition	VP40-GP	-
Untreated	CCC017	9	6291	0.142923	A->C	Transversion	GP	GP: R84
Untreated	CCC017	9	6365	0.144478	C->T	Transition	GP	GP: Y108
Untreated	CCC017	9	6622	0.0215393	G->A	Transition	GP	GP S194N
Untreated	CCC017	9	7668	0.010474	C->T	Transition	GP	GP T543I
Untreated	CCC017	9	7800	0.03125	A->G	Transition	GP	GP K587R
Untreated	CCC017	9	8493	0.0169222	T->C	Transition	GP-VP30	-
Untreated	CCC017	9	9413	0.0102267	T->C	Transition	VP30-VP24	-
Untreated	CCC017	9	9633	0.065503	T->C	Transition	VP30-VP24	-
Untreated	CCC017	9	10269	0.0139501	T->C	Transition	VP30-VP24	-
Untreated	CCC017	9	11414	0.0100512	T->C	Transition	VP24-L	-
Untreated	CCC017	9	12148	0.0106771	T->C	Transition	L	L F189L
Untreated	CCC017	9	14317	0.0107438	T->C	Transition	L	L S912P
Untreated	CCC017	9	16170	0.0188827	T->C	Transition	L	L: F1529
Untreated	CCC017	9	16838	0.0228297	G->A	Transition	L	L G1752D
Untreated	CCC017	9	18343	0.0141339	C->T	Transition	5'	-
Untreated	CCC023	5	427	0.0161394	A->G	Transition	3'	-
Untreated	CCC023	5	1719	0.0121916	C->G	Transversion	NP	NP T416R
Untreated	CCC023	5	1966	0.0766059	T->C	Transition	NP	NP: P498
Untreated	CCC023	5	2281	0.193649	C->T	Transition	NP	NP: V603
Untreated	CCC023	5	3689	0.0182937	T->G	Transversion	VP35	VP35: S186
Untreated	CCC023	5	4208	0.0107708	A->G	Transition	VP35-VP40	-
Untreated	CCC023	5	4212	0.0109214	C->T	Transition	VP35-VP40	-
Untreated	CCC023	5	4364	0.0164444	G->A	Transition	VP35-VP40	-
Untreated	CCC023	5	5595	0.0249774	T->C	Transition	VP40-GP	-
Untreated	CCC023	5	5724	0.0183922	T->C	Transition	VP40-GP	-
Untreated	CCC023	5	7357	0.0494564	C->T	Transition	GP	GP: S439
Untreated	CCC023	5	7431	0.0165968	A->G	Transition	GP	GP H464R
Untreated	CCC023	5	7800	0.201406	A->G	Transition	GP	GP K587R
Untreated	CCC023	5	8057	0.0345263	T->C	Transition	GP	GP F673L
Untreated	CCC023	5	8064	0.0193075	T->C	Transition	GP	GP F675S
Untreated	CCC023	5	8267	0.0717799	A->C	Transversion	GP-VP30	-
Untreated	CCC023	5	9036	0.035767	G->A	Transition	VP30	VP30: V175
Untreated	CCC023	5	9192	0.0155367	A->G	Transition	VP30	VP30: Q227
Untreated	CCC023	5	9568	0.0209015	A->G	Transition	VP30-VP24	-
Untreated	CCC023	5	9777	0.0215676	G->A	Transition	VP30-VP24	-
Untreated	CCC023	5	9970	0.0211389	A->G	Transition	VP30-VP24	-
Untreated	CCC023	5	10820	0.185793	A->C	Transversion	VP24	VP24 K158T
Untreated	CCC023	5	10836	0.025316	G->A	Transition	VP24	VP24: L163
Untreated	CCC023	5	11004	0.0217842	C->T	Transition	VP24	VP24: S219
Untreated	CCC023	5	11430	0.0195313	T->C	Transition	VP24-L	-
Untreated	CCC023	5	11474	0.0189749	T->C	Transition	VP24-L	-
Untreated	CCC023	5	13418	0.0173343	A->G	Transition	L	L H612R
Untreated	CCC023	5	14317	0.0173931	T->C	Transition	L	L S912P
Untreated	CCC023	5	15018	0.0159997	C->T	Transition	L	L: P1145
Untreated	CCC023	5	16672	0.0157011	G->A	Transition	L	L E1697K
Untreated	CCC023	5	16793	0.272273	A->G	Transition	L	L H1737R
Untreated	CCC023	5	18597	0.0180113	T->A	Transversion	5'	-
Untreated	CCC023	7	274	0.0368564	G->T	Transversion	3'	-
Untreated	CCC023	7	297	0.0330782	A->C	Transversion	3'	-
Untreated	CCC023	7	1195	0.0105285	A->G	Transition	NP	NP: S241
Untreated	CCC023	7	1910	0.0240379	G->A	Transition	NP	NP D480N
Untreated	CCC023	7	1966	0.0679131	T->C	Transition	NP	NP: P498
Untreated	CCC023	7	2257	0.0205401	A->G	Transition	NP	NP: E595
Untreated	CCC023	7	2281	0.144463	C->T	Transition	NP	NP: V603
Untreated	CCC023	7	2654	0.187872	A->G	Transition	NP	NP N728D
Untreated	CCC023	7	3700	0.038792	C->T	Transition	VP35	VP35 T190I
Untreated	CCC023	7	4212	0.0110233	C->T	Transition	VP35-VP40	-
Untreated	CCC023	7	5069	0.0678311	A->T	Transversion	VP40	VP40: T196
Untreated	CCC023	7	5595	0.011465	T->C	Transition	VP40-GP	-
Untreated	CCC023	7	5724	0.0171143	T->C	Transition	VP40-GP	-
Untreated	CCC023	7	7357	0.0315097	C->T	Transition	GP	GP: S439
Untreated	CCC023	7	7431	0.0107834	A->G	Transition	GP	GP H464R
Untreated	CCC023	7	7800	0.1498	A->G	Transition	GP	GP K587R
Untreated	CCC023	7	8057	0.0182852	T->C	Transition	GP	GP F673L
Untreated	CCC023	7	8267	0.0416336	A->C	Transversion	GP-VP30	-
Untreated	CCC023	7	9036	0.0203642	G->A	Transition	VP30	VP30: V175
Untreated	CCC023	7	9192	0.0154209	A->G	Transition	VP30	VP30: Q227
Untreated	CCC023	7	9970	0.0306544	A->G	Transition	VP30-VP24	-
Untreated	CCC023	7	10820	0.163732	A->C	Transversion	VP24	VP24 K158T
Untreated	CCC023	7	10836	0.0173522	G->A	Transition	VP24	VP24: L163
Untreated	CCC023	7	11239	0.0214161	T->C	Transition	VP24-L	-
Untreated	CCC023	7	11430	0.0135031	T->C	Transition	VP24-L	-
Untreated	CCC023	7	11474	0.0147119	T->C	Transition	VP24-L	-
Untreated	CCC023	7	16793	0.153446	A->G	Transition	L	L H1737R
Untreated	CCC023	8	47	0.0215517	A->G	Transition	3'	-
Untreated	CCC023	8	305	0.0120923	G->A	Transition	3'	-
Untreated	CCC023	8	453	0.0157214	A->C	Transversion	3'	-
Untreated	CCC023	8	622	0.02052	A->G	Transition	NP	NP: E50
Untreated	CCC023	8	1125	0.014143	T->C	Transition	NP	NP M218T
Untreated	CCC023	8	1648	0.0214839	T->C	Transition	NP	NP: A392
Untreated	CCC023	8	1792	0.0104511	T->C	Transition	NP	NP: H440
Untreated	CCC023	8	2188	0.0165999	C->T	Transition	NP	NP: D572
Untreated	CCC023	8	2325	0.0143266	A->T	Transversion	NP	NP E618V
Untreated	CCC023	8	4116	0.0126225	C->T	Transition	VP35	VP35 L329F
Untreated	CCC023	8	4223	0.0200692	A->C	Transversion	VP35-VP40	-
Untreated	CCC023	8	4302	0.0340909	C->T	Transition	VP35-VP40	-
Untreated	CCC023	8	5663	0.0101616	A->G	Transition	VP40-GP	-
Untreated	CCC023	8	5708	0.0112735	T->G	Transversion	VP40-GP	-
Untreated	CCC023	8	6178	0.0140106	A->G	Transition	GP	GP D46G
Untreated	CCC023	8	6329	0.0140362	C->T	Transition	GP	GP: V96
Untreated	CCC023	8	6424	0.0114579	T->C	Transition	GP	GP I128T
Untreated	CCC023	8	6704	0.0121644	T->C	Transition	GP	GP: A221
Untreated	CCC023	8	6782	0.0134765	C->T	Transition	GP	GP: F247
Untreated	CCC023	8	6872	0.0129727	C->A	Transversion	GP	GP N277K
Untreated	CCC023	8	6888	0.0149334	A->G	Transition	GP	GP T283A
Untreated	CCC023	8	7118	0.0103395	G->A	Transition	GP	-
Untreated	CCC023	8	7204	0.015413	T->C	Transition	GP	GP: H388
Untreated	CCC023	8	7232	0.0141527	T->C	Transition	GP	GP S398P
Untreated	CCC023	8	7373	0.0111458	C->T	Transition	GP	GP P445S
Untreated	CCC023	8	7490	0.0138269	A->G	Transition	GP	GP T484A
Untreated	CCC023	8	7668	0.0449963	C->T	Transition	GP	GP T543I
Untreated	CCC023	8	7800	0.0350781	A->G	Transition	GP	GP K587R
Untreated	CCC023	8	8137	0.0111553	A->G	Transition	GP-VP30	-
Untreated	CCC023	8	8422	0.011864	G->A	Transition	GP-VP30	-
Untreated	CCC023	8	9024	0.0101954	T->C	Transition	VP30	VP30: T171
Untreated	CCC023	8	9208	0.0113486	T->G	Transversion	VP30	VP30 S233A
Untreated	CCC023	8	9444	0.0121084	T->C	Transition	VP30-VP24	-
Untreated	CCC023	8	9544	0.0175623	T->C	Transition	VP30-VP24	-
Untreated	CCC023	8	9550	0.0108373	A->C	Transversion	VP30-VP24	-
Untreated	CCC023	8	10235	0.0126876	A->C	Transversion	VP30-VP24	-
Untreated	CCC023	8	10941	0.0138157	G->A	Transition	VP24	VP24: V198
Untreated	CCC023	8	10959	0.0143495	C->T	Transition	VP24	VP24: D204
Untreated	CCC023	8	11264	0.0146777	C->T	Transition	VP24-L	-
Untreated	CCC023	8	11607	0.0125315	A->G	Transition	L	L: P8
Untreated	CCC023	8	11913	0.0245593	T->C	Transition	L	L: A110
Untreated	CCC023	8	12143	0.0114237	A->T	Transversion	L	L Y187F
Untreated	CCC023	8	13116	0.0139102	T->G	Transversion	L	L S511R
Untreated	CCC023	8	14292	0.0187178	G->A	Transition	L	L: A903
Untreated	CCC023	8	14317	0.0227646	T->C	Transition	L	L S912P
Untreated	CCC023	8	14581	0.023896	A->G	Transition	L	L I1000V
Untreated	CCC023	8	14855	0.0191684	G->A	Transition	L	L C1091Y
Untreated	CCC023	8	15291	0.013492	T->C	Transition	L	L: D1236
Untreated	CCC023	8	16611	0.0102645	A->G	Transition	L	L: E1676
Untreated	CCC023	8	17013	0.0144875	G->A	Transition	L	L: S1810
Untreated	CCC023	8	18420	0.0117647	G->A	Transition	5'	-
Untreated	CCC023	8	18574	0.0120066	A->G	Transition	5'	-
Untreated	CCC023	8	18874	0.0192308	A->G	Transition	5'	-
Untreated	CCC034	5	307	0.0832975	T->C	Transition	3'	-
Untreated	CCC034	5	357	0.0118575	T->C	Transition	3'	-
Untreated	CCC034	5	3356	0.01142	C->T	Transition	VP35	VP35: D75
Untreated	CCC034	5	4261	0.0215393	T->C	Transition	VP35-VP40	-
Untreated	CCC034	5	5536	0.0279816	A->C	Transversion	VP40-GP	-
Untreated	CCC034	5	5597	0.0138573	T->C	Transition	VP40-GP	-
Untreated	CCC034	5	6011	0.165355	T->G	Transversion	VP40-GP	-
Untreated	CCC034	5	6231	0.023097	T->C	Transition	GP	GP S64P
Untreated	CCC034	5	6325	0.0163566	T->C	Transition	GP	GP V95A
Untreated	CCC034	5	7800	0.0197994	A->G	Transition	GP	GP K587R
Untreated	CCC034	5	8441	0.171714	C->T	Transition	GP-VP30	-
Untreated	CCC034	5	9769	0.0125046	A->G	Transition	VP30-VP24	-
Untreated	CCC034	5	10776	0.0149326	A->G	Transition	VP24	VP24: Q143
Untreated	CCC034	5	12038	0.0241049	A->T	Transversion	L	L Y152F
Untreated	CCC034	5	12739	0.0208939	C->A	Transversion	L	L Q386K
Untreated	CCC034	5	13347	0.0127739	T->C	Transition	L	L: F588
Untreated	CCC034	5	13980	0.0229592	T->C	Transition	L	L: Y799
Untreated	CCC034	5	14317	0.0132647	T->C	Transition	L	L S912P
Untreated	CCC034	5	15138	0.0710505	T->G	Transversion	L	L: T1185
Untreated	CCC034	5	15630	0.221937	G->A	Transition	L	L: K1349
Untreated	CCC034	5	15740	0.0796774	A->G	Transition	L	L K1386R
Untreated	CCC034	5	16085	0.0139676	T->C	Transition	L	L L1501P
Untreated	CCC034	5	16170	0.0166302	T->C	Transition	L	L: F1529
Untreated	CCC034	5	16409	0.0336039	T->C	Transition	L	L F1609S
Untreated	CCC034	5	16533	0.108121	T->C	Transition	L	L: N1650
Untreated	CCC034	5	16540	0.113167	T->G	Transversion	L	L Y1653D
Untreated	CCC034	5	16597	0.127299	G->A	Transition	L	L E1672K
Untreated	CCC034	5	16649	0.130017	A->G	Transition	L	L N1689S
Untreated	CCC034	5	16659	0.128196	A->G	Transition	L	L: L1692
Untreated	CCC034	5	17419	0.0129822	A->G	Transition	L	L I1946V
Untreated	CCC034	5	18574	0.0195406	A->G	Transition	5'	-
Untreated	CCC034	5	18666	0.0554695	T->C	Transition	5'	-
Untreated	CCC034	7	47	0.0323062	A->G	Transition	3'	-
Untreated	CCC034	7	1134	0.0684278	T->C	Transition	NP	NP V221A
Untreated	CCC034	7	1135	0.0414911	T->C	Transition	NP	NP: V221
Untreated	CCC034	7	1141	0.0109539	G->A	Transition	NP	NP: G223
Untreated	CCC034	7	1669	0.014841	G->A	Transition	NP	NP: E399
Untreated	CCC034	7	3356	0.0118678	C->T	Transition	VP35	VP35: D75
Untreated	CCC034	7	4212	0.0104645	C->T	Transition	VP35-VP40	-
Untreated	CCC034	7	4261	0.0559691	T->C	Transition	VP35-VP40	-
Untreated	CCC034	7	5259	0.010586	A->C	Transversion	VP40	VP40 I260L
Untreated	CCC034	7	5536	0.0427986	A->C	Transversion	VP40-GP	-
Untreated	CCC034	7	6011	0.0284264	T->G	Transversion	VP40-GP	-
Untreated	CCC034	7	6231	0.0169192	T->C	Transition	GP	GP S64P
Untreated	CCC034	7	6325	0.0138818	T->C	Transition	GP	GP V95A
Untreated	CCC034	7	7800	0.0247189	A->G	Transition	GP	GP K587R
Untreated	CCC034	7	8441	0.0303586	C->T	Transition	GP-VP30	-
Untreated	CCC034	7	10776	0.0103741	A->G	Transition	VP24	VP24: Q143
Untreated	CCC034	7	11848	0.0122317	T->G	Transversion	L	L C89G
Untreated	CCC034	7	11966	0.0153807	A->G	Transition	L	L D128G
Untreated	CCC034	7	12038	0.0309557	A->T	Transversion	L	L Y152F
Untreated	CCC034	7	12739	0.0214427	C->A	Transversion	L	L Q386K
Untreated	CCC034	7	13347	0.0266756	T->C	Transition	L	L: F588
Untreated	CCC034	7	13980	0.0230014	T->C	Transition	L	L: Y799
Untreated	CCC034	7	14317	0.0204732	T->C	Transition	L	L S912P
Untreated	CCC034	7	14855	0.0121243	G->A	Transition	L	L C1091Y
Untreated	CCC034	7	14898	0.0132822	A->G	Transition	L	L: T1105
Untreated	CCC034	7	15630	0.0595682	G->A	Transition	L	L: K1349
Untreated	CCC034	7	16170	0.0190769	T->C	Transition	L	L: F1529
Untreated	CCC034	7	17419	0.015161	A->G	Transition	L	L I1946V
Untreated	CCC034	7	18393	0.0102913	A->G	Transition	5'	-
Untreated	CCC034	7	18574	0.0136431	A->G	Transition	5'	-
Untreated	CCC034	7	18666	0.0353176	T->C	Transition	5'	-
Untreated	CCC034	10	47	0.0453809	A->G	Transition	3'	-
Untreated	CCC034	10	163	0.0234251	A->G	Transition	3'	-
Untreated	CCC034	10	188	0.0297626	A->G	Transition	3'	-
Untreated	CCC034	10	232	0.01135	T->C	Transition	3'	-
Untreated	CCC034	10	406	0.0273172	A->G	Transition	3'	-
Untreated	CCC034	10	586	0.0230619	A->G	Transition	NP	NP: R38
Untreated	CCC034	10	759	0.0525158	A->C	Transversion	NP	NP K96T
Untreated	CCC034	10	779	0.0135281	T->C	Transition	NP	NP F103L
Untreated	CCC034	10	811	0.0130797	G->A	Transition	NP	NP: V113
Untreated	CCC034	10	826	0.0102708	A->G	Transition	NP	NP: E118
Untreated	CCC034	10	946	0.0111824	G->T	Transversion	NP	NP: P158
Untreated	CCC034	10	1022	0.0155249	A->G	Transition	NP	NP I184V
Untreated	CCC034	10	1134	0.0315128	T->C	Transition	NP	NP V221A
Untreated	CCC034	10	1135	0.0430039	T->C	Transition	NP	NP: V221
Untreated	CCC034	10	1141	0.0215163	G->A	Transition	NP	NP: G223
Untreated	CCC034	10	1624	0.0196326	A->G	Transition	NP	NP: E384
Untreated	CCC034	10	1644	0.0143713	A->G	Transition	NP	NP N391S
Untreated	CCC034	10	1669	0.0431316	G->A	Transition	NP	NP: E399
Untreated	CCC034	10	1773	0.0143221	A->G	Transition	NP	NP D434G
Untreated	CCC034	10	1812	0.0123016	A->G	Transition	NP	NP D447G
Untreated	CCC034	10	1868	0.0202698	G->A	Transition	NP	NP G466S
Untreated	CCC034	10	1962	0.0359509	T->G	Transversion	NP	NP V497G
Untreated	CCC034	10	2102	0.0153698	A->G	Transition	NP	NP T544A
Untreated	CCC034	10	2281	0.0211033	C->T	Transition	NP	NP: V603
Untreated	CCC034	10	2350	0.0178152	T->C	Transition	NP	NP: D626
Untreated	CCC034	10	2352	0.0133719	A->G	Transition	NP	NP Q627R
Untreated	CCC034	10	3356	0.012311	C->T	Transition	VP35	VP35: D75
Untreated	CCC034	10	3842	0.0106003	T->C	Transition	VP35	VP35: A237
Untreated	CCC034	10	4212	0.0130245	C->T	Transition	VP35-VP40	-
Untreated	CCC034	10	4261	0.0497118	T->C	Transition	VP35-VP40	-
Untreated	CCC034	10	5259	0.013152	A->C	Transversion	VP40	VP40 I260L
Untreated	CCC034	10	5273	0.0106363	A->G	Transition	VP40	VP40: E264
Untreated	CCC034	10	5536	0.0421864	A->C	Transversion	VP40-GP	-
Untreated	CCC034	10	5597	0.0105674	T->C	Transition	VP40-GP	-
Untreated	CCC034	10	5774	0.0104377	C->T	Transition	VP40-GP	-
Untreated	CCC034	10	6011	0.032934	T->G	Transversion	VP40-GP	-
Untreated	CCC034	10	6231	0.0255763	T->C	Transition	GP	GP S64P
Untreated	CCC034	10	6325	0.0119024	T->C	Transition	GP	GP V95A
Untreated	CCC034	10	6924	0.0104252	A->G	Transition	GP	-
Untreated	CCC034	10	7800	0.0271934	A->G	Transition	GP	GP K587R
Untreated	CCC034	10	8441	0.0178478	C->T	Transition	GP-VP30	-
Untreated	CCC034	10	8719	0.0115098	A->G	Transition	VP30	VP30 I70V
Untreated	CCC034	10	8724	0.0100942	T->C	Transition	VP30	VP30: C71
Untreated	CCC034	10	8761	0.0126091	T->C	Transition	VP30	VP30 F84L
Untreated	CCC034	10	9573	0.0119623	A->G	Transition	VP30-VP24	-
Untreated	CCC034	10	10776	0.0109312	A->G	Transition	VP24	VP24: Q143
Untreated	CCC034	10	11848	0.0100636	T->G	Transversion	L	L C89G
Untreated	CCC034	10	12038	0.0288042	A->T	Transversion	L	L Y152F
Untreated	CCC034	10	12739	0.0136049	C->A	Transversion	L	L Q386K
Untreated	CCC034	10	13347	0.0249104	T->C	Transition	L	L: F588
Untreated	CCC034	10	13980	0.0385542	T->C	Transition	L	L: Y799
Untreated	CCC034	10	14855	0.0121086	G->A	Transition	L	L C1091Y
Untreated	CCC034	10	14898	0.0150951	A->G	Transition	L	L: T1105
Untreated	CCC034	10	15630	0.066107	G->A	Transition	L	L: K1349
Untreated	CCC034	10	16170	0.0228276	T->C	Transition	L	L: F1529
Untreated	CCC034	10	17528	0.0197761	C->T	Transition	L	L A1982V
Untreated	CCC034	10	18574	0.0138876	A->G	Transition	5'	-
Untreated	CCC034	10	18666	0.0280958	T->C	Transition	5'	-
Untreated	CCC034	10	18881	0.0123457	T->C	Transition	5'	-
Untreated	CCC076	5	1999	0.0176056	C->T	Transition	NP	NP: N509
Untreated	CCC076	5	4212	0.0100086	C->T	Transition	VP35-VP40	-
Untreated	CCC076	5	4251	0.0112178	C->T	Transition	VP35-VP40	-
Untreated	CCC076	5	4661	0.0413693	T->C	Transition	VP40	VP40: H60
Untreated	CCC076	5	5276	0.0114545	T->C	Transition	VP40	VP40: T265
Untreated	CCC076	5	5653	0.0445071	T->C	Transition	VP40-GP	-
Untreated	CCC076	5	5762	0.0114338	T->C	Transition	VP40-GP	-
Untreated	CCC076	5	6189	0.0566438	C->A	Transversion	GP	GP L50I
Untreated	CCC076	5	6427	0.0125642	G->A	Transition	GP	GP R129Q
Untreated	CCC076	5	7668	0.0574007	C->T	Transition	GP	GP T543I
Untreated	CCC076	5	7800	0.0165811	A->G	Transition	GP	GP K587R
Untreated	CCC076	5	8685	0.0149778	T->C	Transition	VP30	VP30: V58
Untreated	CCC076	5	10230	0.0690264	A->T	Transversion	VP30-VP24	-
Untreated	CCC076	5	14223	0.0131368	G->A	Transition	L	L: K880
Untreated	CCC076	5	14317	0.0236604	T->C	Transition	L	L S912P
Untreated	CCC076	5	14611	0.252061	T->C	Transition	L	L F1010L
Untreated	CCC076	5	15210	0.0138462	A->G	Transition	L	L: K1209
Untreated	CCC076	5	15735	0.0175839	T->C	Transition	L	L: P1384
Untreated	CCC076	5	16701	0.234122	A->C	Transversion	L	L E1706D
Untreated	CCC076	5	17412	0.0499279	T->C	Transition	L	L: Y1943
Untreated	CCC076	7	142	0.010521	A->G	Transition	3'	-
Untreated	CCC076	7	157	0.0108064	A->G	Transition	3'	-
Untreated	CCC076	7	367	0.0205062	A->C	Transversion	3'	-
Untreated	CCC076	7	512	0.0106536	A->G	Transition	NP	NP T14A
Untreated	CCC076	7	1093	0.0115492	T->C	Transition	NP	NP: F207
Untreated	CCC076	7	1102	0.0294795	A->G	Transition	NP	NP: K210
Untreated	CCC076	7	1976	0.0394083	A->G	Transition	NP	NP T502A
Untreated	CCC076	7	2207	0.0110911	T->C	Transition	NP	NP S579P
Untreated	CCC076	7	2623	0.0315446	A->G	Transition	NP	NP: Q717
Untreated	CCC076	7	3026	0.0137573	A->C	Transversion	NP-VP35	-
Untreated	CCC076	7	3027	0.0149291	C->A	Transversion	NP-VP35	-
Untreated	CCC076	7	3512	0.0122693	C->T	Transition	VP35	VP35: I127
Untreated	CCC076	7	4116	0.0392699	C->T	Transition	VP35	VP35 L329F
Untreated	CCC076	7	4139	0.0213029	A->G	Transition	VP35	VP35: G336
Untreated	CCC076	7	4325	0.0346957	G->A	Transition	VP35-VP40	-
Untreated	CCC076	7	4364	0.0285181	G->A	Transition	VP35-VP40	-
Untreated	CCC076	7	4661	0.0213157	T->C	Transition	VP40	VP40: H60
Untreated	CCC076	7	5653	0.0229171	T->C	Transition	VP40-GP	-
Untreated	CCC076	7	6179	0.0283919	T->C	Transition	GP	GP: D46
Untreated	CCC076	7	6184	0.0300323	A->G	Transition	GP	GP D48G
Untreated	CCC076	7	6189	0.0161555	C->A	Transversion	GP	GP L50I
Untreated	CCC076	7	6329	0.0442096	C->T	Transition	GP	GP: V96
Untreated	CCC076	7	7668	0.0788867	C->T	Transition	GP	GP T543I
Untreated	CCC076	7	7800	0.0779594	A->G	Transition	GP	GP K587R
Untreated	CCC076	7	9578	0.0455526	A->G	Transition	VP30-VP24	-
Untreated	CCC076	7	9761	0.033601	T->C	Transition	VP30-VP24	-
Untreated	CCC076	7	9940	0.0297313	C->T	Transition	VP30-VP24	-
Untreated	CCC076	7	10230	0.0384854	A->T	Transversion	VP30-VP24	-
Untreated	CCC076	7	10674	0.0232977	T->C	Transition	VP24	VP24: S109
Untreated	CCC076	7	10760	0.0439787	A->C	Transversion	VP24	VP24 Q138P
Untreated	CCC076	7	10974	0.0620093	C->T	Transition	VP24	VP24: N209
Untreated	CCC076	7	11316	0.019554	T->C	Transition	VP24-L	-
Untreated	CCC076	7	11430	0.0422102	T->C	Transition	VP24-L	-
Untreated	CCC076	7	11474	0.0400743	T->C	Transition	VP24-L	-
Untreated	CCC076	7	11791	0.0248109	T->C	Transition	L	L: L70
Untreated	CCC076	7	11938	0.055746	A->G	Transition	L	L N119D
Untreated	CCC076	7	13272	0.0135919	A->G	Transition	L	L: G563
Untreated	CCC076	7	14229	0.059832	T->C	Transition	L	L: F882
Untreated	CCC076	7	14317	0.0108777	T->C	Transition	L	L S912P
Untreated	CCC076	7	14611	0.0788375	T->C	Transition	L	L F1010L
Untreated	CCC076	7	15783	0.0108932	C->T	Transition	L	L: F1400
Untreated	CCC076	7	15827	0.0259524	T->C	Transition	L	L L1415P
Untreated	CCC076	7	16170	0.0172444	T->C	Transition	L	L: F1529
Untreated	CCC076	7	16264	0.0333251	A->G	Transition	L	L I1561V
Untreated	CCC076	7	16701	0.107365	A->C	Transversion	L	L E1706D
Untreated	CCC076	7	17412	0.0202405	T->C	Transition	L	L: Y1943
Untreated	CCC076	7	17424	0.0259331	A->G	Transition	L	L: L1947
Untreated	CCC076	7	17521	0.0135148	T->G	Transversion	L	L F1980V
Untreated	CCC076	9	354	0.020766	A->G	Transition	3'	-
Untreated	CCC076	9	534	0.0398648	A->G	Transition	NP	NP H21R
Untreated	CCC076	9	651	0.0135786	A->G	Transition	NP	NP E60G
Untreated	CCC076	9	735	0.129526	T->G	Transversion	NP	NP L88R
Untreated	CCC076	9	1054	0.0114168	A->G	Transition	NP	NP: G194
Untreated	CCC076	9	1688	0.0148427	G->A	Transition	NP	NP E406K
Untreated	CCC076	9	4661	0.0666007	T->C	Transition	VP40	VP40: H60
Untreated	CCC076	9	5090	0.0212985	T->C	Transition	VP40	VP40: R203
Untreated	CCC076	9	5276	0.015476	T->C	Transition	VP40	VP40: T265
Untreated	CCC076	9	5596	0.0116235	T->C	Transition	VP40-GP	-
Untreated	CCC076	9	5597	0.031555	T->C	Transition	VP40-GP	-
Untreated	CCC076	9	5653	0.064744	T->C	Transition	VP40-GP	-
Untreated	CCC076	9	5749	0.0128223	T->C	Transition	VP40-GP	-
Untreated	CCC076	9	5762	0.0127418	T->C	Transition	VP40-GP	-
Untreated	CCC076	9	6189	0.0409001	C->A	Transversion	GP	GP L50I
Untreated	CCC076	9	6197	0.0110389	T->C	Transition	GP	GP: C52
Untreated	CCC076	9	6210	0.0103027	T->C	Transition	GP	GP S57P
Untreated	CCC076	9	6424	0.0198045	T->C	Transition	GP	GP I128T
Untreated	CCC076	9	6427	0.0104948	G->A	Transition	GP	GP R129Q
Untreated	CCC076	9	6500	0.0132373	C->T	Transition	GP	GP: H153
Untreated	CCC076	9	7381	0.0136567	C->A	Transversion	GP	GP: T447
Untreated	CCC076	9	7668	0.0596632	C->T	Transition	GP	GP T543I
Untreated	CCC076	9	7800	0.0360726	A->G	Transition	GP	GP K587R
Untreated	CCC076	9	8095	0.0126358	A->G	Transition	GP-VP30	-
Untreated	CCC076	9	8308	0.0124481	T->C	Transition	GP-VP30	-
Untreated	CCC076	9	8479	0.0133621	A->G	Transition	GP-VP30	-
Untreated	CCC076	9	8621	0.0126765	A->G	Transition	VP30	VP30 E37G
Untreated	CCC076	9	8675	0.0122497	A->G	Transition	VP30	VP30 K55R
Untreated	CCC076	9	8685	0.0102139	T->C	Transition	VP30	VP30: V58
Untreated	CCC076	9	8720	0.011988	T->C	Transition	VP30	VP30 I70T
Untreated	CCC076	9	8918	0.0103617	A->G	Transition	VP30	VP30 E136G
Untreated	CCC076	9	9353	0.01089	G->T	Transversion	VP30	VP30 W281L
Untreated	CCC076	9	9511	0.0119099	A->G	Transition	VP30-VP24	-
Untreated	CCC076	9	9588	0.0103356	C->T	Transition	VP30-VP24	-
Untreated	CCC076	9	9611	0.0106589	C->T	Transition	VP30-VP24	-
Untreated	CCC076	9	9818	0.0104053	T->C	Transition	VP30-VP24	-
Untreated	CCC076	9	9904	0.0270469	G->T	Transversion	VP30-VP24	-
Untreated	CCC076	9	9966	0.0113785	T->C	Transition	VP30-VP24	-
Untreated	CCC076	9	10230	0.102358	A->T	Transversion	VP30-VP24	-
Untreated	CCC076	9	10487	0.0115083	A->G	Transition	VP24	VP24 D47G
Untreated	CCC076	9	12754	0.0160295	C->T	Transition	L	L H391Y
Untreated	CCC076	9	12796	0.0110956	G->A	Transition	L	L E405K
Untreated	CCC076	9	14379	0.0132214	A->G	Transition	L	L: L932
Untreated	CCC076	9	14611	0.209836	T->C	Transition	L	L F1010L
Untreated	CCC076	9	16701	0.239631	A->C	Transversion	L	L E1706D
Untreated	CCC076	9	17412	0.047256	T->C	Transition	L	L: Y1943
Untreated	CCC076	9	17868	0.0137434	T->C	Transition	L	L: I2095
Untreated	CCC076	9	18181	0.0112924	C->A	Transversion	L	L L2200M
Untreated	CCC076	9	18711	0.0174362	T->C	Transition	5'	-
Untreated	CCC076	9	18725	0.0200182	C->T	Transition	5'	-
Untreated	CCE006	5	727	0.0122036	T->C	Transition	NP	NP: D85
Untreated	CCE006	5	727	0.0122036	T->C	Transition	NP	NP: D85
Untreated	CCE006	5	1708	0.0111519	A->G	Transition	NP	NP: S412
Untreated	CCE006	5	1708	0.0111519	A->G	Transition	NP	NP: S412
Untreated	CCE006	5	2198	0.0103005	G->A	Transition	NP	NP D576N
Untreated	CCE006	5	2198	0.0103005	G->A	Transition	NP	NP D576N
Untreated	CCE006	5	2654	0.418483	A->G	Transition	NP	NP N728D
Untreated	CCE006	5	2654	0.418483	A->G	Transition	NP	NP N728D
Untreated	CCE006	5	3700	0.098065	C->T	Transition	VP35	VP35 T190I
Untreated	CCE006	5	3700	0.098065	C->T	Transition	VP35	VP35 T190I
Untreated	CCE006	5	4959	0.0122458	T->C	Transition	VP40	VP40 F160L
Untreated	CCE006	5	4959	0.0122458	T->C	Transition	VP40	VP40 F160L
Untreated	CCE006	5	5069	0.218693	A->T	Transversion	VP40	VP40: T196
Untreated	CCE006	5	5069	0.218693	A->T	Transversion	VP40	VP40: T196
Untreated	CCE006	5	5755	0.0118816	C->T	Transition	VP40-GP	-
Untreated	CCE006	5	5755	0.0118816	C->T	Transition	VP40-GP	-
Untreated	CCE006	5	6424	0.0115686	T->C	Transition	GP	GP I128T
Untreated	CCE006	5	6424	0.0115686	T->C	Transition	GP	GP I128T
Untreated	CCE006	5	7800	0.0109383	A->G	Transition	GP	GP K587R
Untreated	CCE006	5	7800	0.0109383	A->G	Transition	GP	GP K587R
Untreated	CCE006	5	8983	0.0110268	A->T	Transversion	VP30	VP30 I158F
Untreated	CCE006	5	8983	0.0110268	A->T	Transversion	VP30	VP30 I158F
Untreated	CCE006	5	11189	0.0157366	A->G	Transition	VP24-L	-
Untreated	CCE006	5	11189	0.0157366	A->G	Transition	VP24-L	-
Untreated	CCE006	5	11209	0.0135929	A->G	Transition	VP24-L	-
Untreated	CCE006	5	11209	0.0135929	A->G	Transition	VP24-L	-
Untreated	CCE006	5	11239	0.0427839	T->C	Transition	VP24-L	-
Untreated	CCE006	5	11239	0.0427839	T->C	Transition	VP24-L	-
Untreated	CCE006	5	12804	0.0178911	T->C	Transition	L	L: Y407
Untreated	CCE006	5	12804	0.0178911	T->C	Transition	L	L: Y407
Untreated	CCE006	5	14873	0.0110574	A->G	Transition	L	L E1097G
Untreated	CCE006	5	14873	0.0110574	A->G	Transition	L	L E1097G
Untreated	CCE006	5	18574	0.0105602	A->G	Transition	5'	-
Untreated	CCE006	5	18574	0.0105602	A->G	Transition	5'	-
Untreated	CCE006	7	34	0.0104167	T->C	Transition	3'	-
Untreated	CCE006	7	727	0.013316	T->C	Transition	NP	NP: D85
Untreated	CCE006	7	2654	0.446771	G->A	Transition	NP	NP D728N
Untreated	CCE006	7	3700	0.0825181	C->T	Transition	VP35	VP35 T190I
Untreated	CCE006	7	5069	0.223679	A->T	Transversion	VP40	VP40: T196
Untreated	CCE006	7	7800	0.0101308	A->G	Transition	GP	GP K587R
Untreated	CCE006	7	10894	0.0353154	C->A	Transversion	VP24	VP24 Q183K
Untreated	CCE006	7	12804	0.0110705	T->C	Transition	L	L: Y407
Untreated	CCE006	7	14317	0.0285311	T->C	Transition	L	L S912P
Untreated	CCE006	8	727	0.0187114	T->C	Transition	NP	NP: D85
Untreated	CCE006	8	1708	0.0156762	A->G	Transition	NP	NP: S412
Untreated	CCE006	8	2198	0.0153219	G->A	Transition	NP	NP D576N
Untreated	CCE006	8	2654	0.411651	G->A	Transition	NP	NP D728N
Untreated	CCE006	8	3700	0.0787491	C->T	Transition	VP35	VP35 T190I
Untreated	CCE006	8	5069	0.185354	A->T	Transversion	VP40	VP40: T196
Untreated	CCE006	8	10894	0.0276286	C->A	Transversion	VP24	VP24 Q183K
Untreated	CCE006	8	12146	0.0113064	T->G	Transversion	L	L V188G
Untreated	CCE006	8	12804	0.0104272	T->C	Transition	L	L: Y407
Untreated	CCE006	8	14317	0.0112567	T->C	Transition	L	L S912P
Untreated	CCE006	8	15211	0.0132844	T->C	Transition	L	L C1210R
Untreated	CCE006	8	15454	0.0273522	T->C	Transition	L	L: L1291
Untreated	CCE006	8	15502	0.0186533	T->C	Transition	L	L S1307P
Untreated	CCE006	8	15684	0.0719813	T->C	Transition	L	L: D1367
Untreated	CCE006	8	16036	0.0295184	T->C	Transition	L	L: L1485
Untreated	CCE006	8	16322	0.0106773	T->C	Transition	L	L L1580P
Untreated	CCI036	5	778	0.0312704	G->A	Transition	NP	NP: G102
Untreated	CCI036	5	865	0.010313	A->G	Transition	NP	NP: R131
Untreated	CCI036	5	1735	0.0308148	T->C	Transition	NP	NP: D421
Untreated	CCI036	5	2917	0.0114762	A->G	Transition	NP-VP35	-
Untreated	CCI036	5	3242	0.0183599	T->C	Transition	VP35	VP35: I37
Untreated	CCI036	5	3388	0.0162036	T->G	Transversion	VP35	VP35 V86G
Untreated	CCI036	5	3803	0.0356117	A->G	Transition	VP35	VP35: R224
Untreated	CCI036	5	4212	0.0129698	C->T	Transition	VP35-VP40	-
Untreated	CCI036	5	6132	0.0125167	T->C	Transition	GP	GP S31P
Untreated	CCI036	5	6325	0.0324956	T->A	Transversion	GP	GP V95E
Untreated	CCI036	5	6383	0.107389	A->G	Transition	GP	GP: K114
Untreated	CCI036	5	6582	0.0236772	G->T	Transversion	GP	GP A181S
Untreated	CCI036	5	7668	0.0233512	C->T	Transition	GP	GP T543I
Untreated	CCI036	5	7672	0.0208002	G->A	Transition	GP	GP: E544
Untreated	CCI036	5	7720	0.0211749	G->A	Transition	GP	GP: L560
Untreated	CCI036	5	7800	0.0264171	A->G	Transition	GP	GP K587R
Untreated	CCI036	5	8080	0.013247	A->G	Transition	GP-VP30	-
Untreated	CCI036	5	8257	0.0177621	A->G	Transition	GP-VP30	-
Untreated	CCI036	5	8330	0.0122275	C->T	Transition	GP-VP30	-
Untreated	CCI036	5	8591	0.0149498	G->A	Transition	VP30	VP30 R27Q
Untreated	CCI036	5	8689	0.0123017	C->T	Transition	VP30	VP30 P60S
Untreated	CCI036	5	9444	0.0152605	T->C	Transition	VP30-VP24	-
Untreated	CCI036	5	9665	0.0169969	A->G	Transition	VP30-VP24	-
Untreated	CCI036	5	9726	0.0124683	A->C	Transversion	VP30-VP24	-
Untreated	CCI036	5	10279	0.0283323	A->G	Transition	VP30-VP24	-
Untreated	CCI036	5	10797	0.0110893	G->A	Transition	VP24	VP24: S150
Untreated	CCI036	5	11057	0.0129031	T->C	Transition	VP24	VP24 M237T
Untreated	CCI036	5	13260	0.0116097	T->C	Transition	L	L: G559
Untreated	CCI036	5	14317	0.029442	T->C	Transition	L	L S912P
Untreated	CCI036	5	14624	0.0601463	T->A	Transversion	L	L M1014K
Untreated	CCI036	5	15396	0.011859	C->T	Transition	L	L: N1271
Untreated	CCI036	5	15783	0.0181775	C->T	Transition	L	L: F1400
Untreated	CCI036	5	16170	0.0316314	T->C	Transition	L	L: F1529
Untreated	CCI036	5	17443	0.0219325	G->A	Transition	L	L V1954I
Untreated	CCI036	5	18177	0.0166876	G->A	Transition	L	L: G2198
Untreated	CCI036	5	18574	0.0154615	A->G	Transition	5'	-
Untreated	CCI036	7	778	0.0285074	G->A	Transition	NP	NP: G102
Untreated	CCI036	7	865	0.0121283	A->G	Transition	NP	NP: R131
Untreated	CCI036	7	1735	0.0287625	T->C	Transition	NP	NP: D421
Untreated	CCI036	7	2281	0.0103614	C->T	Transition	NP	NP: V603
Untreated	CCI036	7	2917	0.0133655	A->G	Transition	NP-VP35	-
Untreated	CCI036	7	3242	0.0162049	T->C	Transition	VP35	VP35: I37
Untreated	CCI036	7	3388	0.0153882	T->G	Transversion	VP35	VP35 V86G
Untreated	CCI036	7	3803	0.0337879	A->G	Transition	VP35	VP35: R224
Untreated	CCI036	7	4212	0.015213	C->T	Transition	VP35-VP40	-
Untreated	CCI036	7	6132	0.0142619	T->C	Transition	GP	GP S31P
Untreated	CCI036	7	6325	0.0378661	T->A	Transversion	GP	GP V95E
Untreated	CCI036	7	6383	0.0969684	A->G	Transition	GP	GP: K114
Untreated	CCI036	7	6582	0.024249	G->T	Transversion	GP	GP A181S
Untreated	CCI036	7	7668	0.0205542	C->T	Transition	GP	GP T543I
Untreated	CCI036	7	7672	0.0169001	G->A	Transition	GP	GP: E544
Untreated	CCI036	7	7720	0.0296543	G->A	Transition	GP	GP: L560
Untreated	CCI036	7	7800	0.0262671	A->G	Transition	GP	GP K587R
Untreated	CCI036	7	8080	0.0126296	A->G	Transition	GP-VP30	-
Untreated	CCI036	7	8257	0.0153093	A->G	Transition	GP-VP30	-
Untreated	CCI036	7	8330	0.0131242	C->T	Transition	GP-VP30	-
Untreated	CCI036	7	8591	0.0107626	G->A	Transition	VP30	VP30 R27Q
Untreated	CCI036	7	8689	0.0119575	C->T	Transition	VP30	VP30 P60S
Untreated	CCI036	7	8717	0.0110999	A->G	Transition	VP30	VP30 D69G
Untreated	CCI036	7	9444	0.0149795	T->C	Transition	VP30-VP24	-
Untreated	CCI036	7	9665	0.016695	A->G	Transition	VP30-VP24	-
Untreated	CCI036	7	9726	0.0101331	A->C	Transversion	VP30-VP24	-
Untreated	CCI036	7	10279	0.0164204	A->G	Transition	VP30-VP24	-
Untreated	CCI036	7	11057	0.0136136	T->C	Transition	VP24	VP24 M237T
Untreated	CCI036	7	14317	0.0145386	T->C	Transition	L	L S912P
Untreated	CCI036	7	14624	0.0665577	T->A	Transversion	L	L M1014K
Untreated	CCI036	7	15396	0.0110863	C->T	Transition	L	L: N1271
Untreated	CCI036	7	15516	0.0113316	C->T	Transition	L	L: S1311
Untreated	CCI036	7	15783	0.0216083	C->T	Transition	L	L: F1400
Untreated	CCI036	7	16170	0.0303918	T->C	Transition	L	L: F1529
Untreated	CCI036	7	17443	0.0276798	G->A	Transition	L	L V1954I
Untreated	CCI036	7	18177	0.0180328	G->A	Transition	L	L: G2198
Untreated	CCI036	7	18574	0.0176322	A->G	Transition	5'	-
Untreated	CCI036	8	778	0.0271181	G->A	Transition	NP	NP: G102
Untreated	CCI036	8	1735	0.028914	T->C	Transition	NP	NP: D421
Untreated	CCI036	8	2085	0.0161306	A->G	Transition	NP	NP H538R
Untreated	CCI036	8	2281	0.0126873	C->T	Transition	NP	NP: V603
Untreated	CCI036	8	2917	0.0108901	A->G	Transition	NP-VP35	-
Untreated	CCI036	8	3242	0.0149567	T->C	Transition	VP35	VP35: I37
Untreated	CCI036	8	3388	0.0141077	T->G	Transversion	VP35	VP35 V86G
Untreated	CCI036	8	3803	0.0380271	A->G	Transition	VP35	VP35: R224
Untreated	CCI036	8	4212	0.0134829	C->T	Transition	VP35-VP40	-
Untreated	CCI036	8	6132	0.0142944	T->C	Transition	GP	GP S31P
Untreated	CCI036	8	6325	0.0403574	T->A	Transversion	GP	GP V95E
Untreated	CCI036	8	6383	0.101009	A->G	Transition	GP	GP: K114
Untreated	CCI036	8	6582	0.0290243	G->T	Transversion	GP	GP A181S
Untreated	CCI036	8	7668	0.0241406	C->T	Transition	GP	GP T543I
Untreated	CCI036	8	7672	0.0196908	G->A	Transition	GP	GP: E544
Untreated	CCI036	8	7720	0.0300236	G->A	Transition	GP	GP: L560
Untreated	CCI036	8	7800	0.0250917	A->G	Transition	GP	GP K587R
Untreated	CCI036	8	8080	0.013739	A->G	Transition	GP-VP30	-
Untreated	CCI036	8	8257	0.0156859	A->G	Transition	GP-VP30	-
Untreated	CCI036	8	8591	0.0118421	G->A	Transition	VP30	VP30 R27Q
Untreated	CCI036	8	8689	0.0112093	C->T	Transition	VP30	VP30 P60S
Untreated	CCI036	8	8766	0.237864	C->A	Transversion	VP30	VP30 C85X
Untreated	CCI036	8	9444	0.0162173	T->C	Transition	VP30-VP24	-
Untreated	CCI036	8	9665	0.0143567	A->G	Transition	VP30-VP24	-
Untreated	CCI036	8	9726	0.0124208	A->C	Transversion	VP30-VP24	-
Untreated	CCI036	8	10279	0.0268718	A->G	Transition	VP30-VP24	-
Untreated	CCI036	8	10797	0.0113236	G->A	Transition	VP24	VP24: S150
Untreated	CCI036	8	11057	0.0115572	T->C	Transition	VP24	VP24 M237T
Untreated	CCI036	8	13260	0.0107618	T->C	Transition	L	L: G559
Untreated	CCI036	8	14317	0.0164428	T->C	Transition	L	L S912P
Untreated	CCI036	8	14624	0.0643357	T->A	Transversion	L	L M1014K
Untreated	CCI036	8	15396	0.0109222	C->T	Transition	L	L: N1271
Untreated	CCI036	8	15783	0.0269235	C->T	Transition	L	L: F1400
Untreated	CCI036	8	16170	0.0301978	T->C	Transition	L	L: F1529
Untreated	CCI036	8	17443	0.0280587	G->A	Transition	L	L V1954I
Untreated	CCI036	8	18177	0.0173496	G->A	Transition	L	L: G2198
Untreated	CCI036	8	18574	0.0186545	A->G	Transition	5'	-
Untreated	CCJ046	5	47	0.0347084	A->G	Transition	3'	-
Untreated	CCJ046	5	249	0.0669519	C->T	Transition	3'	-
Untreated	CCJ046	5	305	0.0107092	G->A	Transition	3'	-
Untreated	CCJ046	5	369	0.0188694	T->C	Transition	3'	-
Untreated	CCJ046	5	453	0.0183176	A->C	Transversion	3'	-
Untreated	CCJ046	5	489	0.0234528	A->G	Transition	NP	NP K6R
Untreated	CCJ046	5	595	0.0283408	A->G	Transition	NP	NP: P41
Untreated	CCJ046	5	622	0.0479537	A->G	Transition	NP	NP: E50
Untreated	CCJ046	5	914	0.0120165	C->T	Transition	NP	NP Q148X
Untreated	CCJ046	5	1342	0.0241112	A->G	Transition	NP	NP: G290
Untreated	CCJ046	5	1597	0.0248776	T->C	Transition	NP	NP: L375
Untreated	CCJ046	5	1792	0.0206945	T->C	Transition	NP	NP: H440
Untreated	CCJ046	5	1839	0.0199784	T->C	Transition	NP	NP V456A
Untreated	CCJ046	5	2354	0.0294239	G->A	Transition	NP	NP D628N
Untreated	CCJ046	5	2888	0.0109143	C->T	Transition	NP-VP35	-
Untreated	CCJ046	5	4116	0.0183627	C->T	Transition	VP35	VP35 L329F
Untreated	CCJ046	5	4223	0.0299031	A->C	Transversion	VP35-VP40	-
Untreated	CCJ046	5	4302	0.0304535	C->T	Transition	VP35-VP40	-
Untreated	CCJ046	5	6177	0.0159262	G->A	Transition	GP	GP D46N
Untreated	CCJ046	5	6329	0.0219498	C->T	Transition	GP	GP: V96
Untreated	CCJ046	5	6427	0.0113652	G->A	Transition	GP	GP R129Q
Untreated	CCJ046	5	6782	0.0170387	C->T	Transition	GP	GP: F247
Untreated	CCJ046	5	6872	0.0100536	C->A	Transversion	GP	GP N277K
Untreated	CCJ046	5	6888	0.0159972	A->G	Transition	GP	GP T283A
Untreated	CCJ046	5	7118	0.0112442	G->A	Transition	GP	-
Untreated	CCJ046	5	7204	0.0212892	T->C	Transition	GP	GP: H388
Untreated	CCJ046	5	7490	0.0229049	A->G	Transition	GP	GP T484A
Untreated	CCJ046	5	7668	0.0370959	C->T	Transition	GP	GP T543I
Untreated	CCJ046	5	7800	0.0369629	A->G	Transition	GP	GP K587R
Untreated	CCJ046	5	9009	0.0131633	A->G	Transition	VP30	VP30: L166
Untreated	CCJ046	5	9024	0.0142227	T->C	Transition	VP30	VP30: T171
Untreated	CCJ046	5	9544	0.0115287	T->C	Transition	VP30-VP24	-
Untreated	CCJ046	5	9603	0.0128306	C->T	Transition	VP30-VP24	-
Untreated	CCJ046	5	10235	0.0150931	A->C	Transversion	VP30-VP24	-
Untreated	CCJ046	5	10941	0.0104383	G->A	Transition	VP24	VP24: V198
Untreated	CCJ046	5	10959	0.0190421	C->T	Transition	VP24	VP24: D204
Untreated	CCJ046	5	11913	0.0143217	T->C	Transition	L	L: A110
Untreated	CCJ046	5	12143	0.0224942	A->T	Transversion	L	L Y187F
Untreated	CCJ046	5	13116	0.0264919	T->G	Transversion	L	L S511R
Untreated	CCJ046	5	14292	0.0124051	G->A	Transition	L	L: A903
Untreated	CCJ046	5	14317	0.0135111	T->C	Transition	L	L S912P
Untreated	CCJ046	5	14581	0.0344174	A->G	Transition	L	L I1000V
Untreated	CCJ046	5	15291	0.01433	T->C	Transition	L	L: D1236
Untreated	CCJ046	5	15735	0.0257261	T->C	Transition	L	L: P1384
Untreated	CCJ046	5	16503	0.0102476	G->A	Transition	L	L: A1640
Untreated	CCJ046	5	18420	0.011169	G->A	Transition	5'	-
Untreated	CCJ046	5	18574	0.0104472	A->G	Transition	5'	-
Untreated	CCJ046	5	18763	0.023397	G->A	Transition	5'	-
Untreated	CCJ046	7	453	0.0150218	A->C	Transversion	3'	-
Untreated	CCJ046	7	622	0.0189382	A->G	Transition	NP	NP: E50
Untreated	CCJ046	7	1125	0.0117229	T->C	Transition	NP	NP M218T
Untreated	CCJ046	7	1404	0.0134519	T->C	Transition	NP	NP L311P
Untreated	CCJ046	7	1648	0.0166331	T->C	Transition	NP	NP: A392
Untreated	CCJ046	7	2188	0.0191304	C->T	Transition	NP	NP: D572
Untreated	CCJ046	7	2325	0.0138003	A->T	Transversion	NP	NP E618V
Untreated	CCJ046	7	2888	0.0107976	C->T	Transition	NP-VP35	-
Untreated	CCJ046	7	4116	0.0115804	C->T	Transition	VP35	VP35 L329F
Untreated	CCJ046	7	4223	0.0201466	A->C	Transversion	VP35-VP40	-
Untreated	CCJ046	7	4302	0.0312898	C->T	Transition	VP35-VP40	-
Untreated	CCJ046	7	5597	0.0104972	T->C	Transition	VP40-GP	-
Untreated	CCJ046	7	5663	0.0112026	A->G	Transition	VP40-GP	-
Untreated	CCJ046	7	5708	0.0111365	T->G	Transversion	VP40-GP	-
Untreated	CCJ046	7	6178	0.0126	A->G	Transition	GP	GP D46G
Untreated	CCJ046	7	6329	0.0141271	C->T	Transition	GP	GP: V96
Untreated	CCJ046	7	6704	0.0118572	T->C	Transition	GP	GP: A221
Untreated	CCJ046	7	6782	0.0112593	C->T	Transition	GP	GP: F247
Untreated	CCJ046	7	7118	0.0107586	G->A	Transition	GP	-
Untreated	CCJ046	7	7204	0.0135366	T->C	Transition	GP	GP: H388
Untreated	CCJ046	7	7232	0.0117988	T->C	Transition	GP	GP S398P
Untreated	CCJ046	7	7490	0.0122372	A->G	Transition	GP	GP T484A
Untreated	CCJ046	7	7668	0.0450458	C->T	Transition	GP	GP T543I
Untreated	CCJ046	7	7800	0.0394792	A->G	Transition	GP	GP K587R
Untreated	CCJ046	7	8137	0.0112627	A->G	Transition	GP-VP30	-
Untreated	CCJ046	7	8422	0.013251	G->A	Transition	GP-VP30	-
Untreated	CCJ046	7	9208	0.011735	T->G	Transversion	VP30	VP30 S233A
Untreated	CCJ046	7	9544	0.0193027	T->C	Transition	VP30-VP24	-
Untreated	CCJ046	7	9550	0.0115873	A->C	Transversion	VP30-VP24	-
Untreated	CCJ046	7	10231	0.0106143	A->G	Transition	VP30-VP24	-
Untreated	CCJ046	7	10235	0.0145725	A->C	Transversion	VP30-VP24	-
Untreated	CCJ046	7	10941	0.0185788	G->A	Transition	VP24	VP24: V198
Untreated	CCJ046	7	10959	0.0125392	C->T	Transition	VP24	VP24: D204
Untreated	CCJ046	7	11264	0.0150685	C->T	Transition	VP24-L	-
Untreated	CCJ046	7	11607	0.013402	A->G	Transition	L	L: P8
Untreated	CCJ046	7	11913	0.0232663	T->C	Transition	L	L: A110
Untreated	CCJ046	7	13116	0.0117535	T->G	Transversion	L	L S511R
Untreated	CCJ046	7	14176	0.0142022	T->C	Transition	L	L F865L
Untreated	CCJ046	7	14292	0.0203466	G->A	Transition	L	L: A903
Untreated	CCJ046	7	14317	0.0229154	T->C	Transition	L	L S912P
Untreated	CCJ046	7	14581	0.0238867	A->G	Transition	L	L I1000V
Untreated	CCJ046	7	14855	0.0163399	G->A	Transition	L	L C1091Y
Untreated	CCJ046	7	15291	0.013215	T->C	Transition	L	L: D1236
Untreated	CCJ046	7	17013	0.0144491	G->A	Transition	L	L: S1810
Untreated	CCJ046	7	17521	0.0151477	T->G	Transversion	L	L F1980V
Untreated	CCJ046	7	18337	0.0123067	A->C	Transversion	5'	-
Untreated	CCJ046	7	18574	0.0158458	A->G	Transition	5'	-
Untreated	CCJ046	10	47	0.0605578	A->G	Transition	3'	-
Untreated	CCJ046	10	206	0.0101065	T->C	Transition	3'	-
Untreated	CCJ046	10	557	0.0132661	T->C	Transition	NP	NP S29P
Untreated	CCJ046	10	672	0.0127488	A->G	Transition	NP	NP E67G
Untreated	CCJ046	10	754	0.0114849	A->G	Transition	NP	NP: A94
Untreated	CCJ046	10	792	0.021894	T->C	Transition	NP	NP V107A
Untreated	CCJ046	10	893	0.0206751	A->G	Transition	NP	NP T141A
Untreated	CCJ046	10	923	0.0446209	T->C	Transition	NP	NP S151P
Untreated	CCJ046	10	995	0.0333941	A->G	Transition	NP	NP I175V
Untreated	CCJ046	10	1260	0.0173226	T->C	Transition	NP	NP L263P
Untreated	CCJ046	10	1404	0.0117138	T->C	Transition	NP	NP L311P
Untreated	CCJ046	10	1669	0.0604806	G->A	Transition	NP	NP: E399
Untreated	CCJ046	10	1779	0.0106292	A->G	Transition	NP	NP D436G
Untreated	CCJ046	10	1792	0.0716958	T->C	Transition	NP	NP: H440
Untreated	CCJ046	10	1816	0.0110423	A->G	Transition	NP	NP: S448
Untreated	CCJ046	10	2035	0.0112775	A->G	Transition	NP	NP: T521
Untreated	CCJ046	10	2038	0.0440093	A->G	Transition	NP	NP: Q522
Untreated	CCJ046	10	2138	0.0229843	A->G	Transition	NP	NP T556A
Untreated	CCJ046	10	2281	0.0399587	C->T	Transition	NP	NP: V603
Untreated	CCJ046	10	2287	0.0127851	A->G	Transition	NP	NP: P605
Untreated	CCJ046	10	2333	0.0191759	C->T	Transition	NP	NP Q621X
Untreated	CCJ046	10	2388	0.058606	A->G	Transition	NP	NP D639G
Untreated	CCJ046	10	2512	0.0174298	T->C	Transition	NP	NP: S680
Untreated	CCJ046	10	3196	0.0109686	C->T	Transition	VP35	VP35 P22L
Untreated	CCJ046	10	3687	0.0196603	T->C	Transition	VP35	VP35 S186P
Untreated	CCJ046	10	3690	0.0103414	A->G	Transition	VP35	VP35 R187G
Untreated	CCJ046	10	3765	0.0179507	A->G	Transition	VP35	VP35 N212D
Untreated	CCJ046	10	4116	0.0142926	C->T	Transition	VP35	VP35 L329F
Untreated	CCJ046	10	4223	0.0292885	A->C	Transversion	VP35-VP40	-
Untreated	CCJ046	10	4302	0.0261913	C->T	Transition	VP35-VP40	-
Untreated	CCJ046	10	4745	0.0108919	G->A	Transition	VP40	VP40 M88I
Untreated	CCJ046	10	5663	0.0114286	A->G	Transition	VP40-GP	-
Untreated	CCJ046	10	6078	0.011751	T->C	Transition	GP	GP F13L
Untreated	CCJ046	10	6082	0.011817	A->G	Transition	GP	GP K14R
Untreated	CCJ046	10	6096	0.013983	T->C	Transition	GP	GP F19L
Untreated	CCJ046	10	6106	0.0126167	T->C	Transition	GP	GP V22A
Untreated	CCJ046	10	6130	0.0131337	T->C	Transition	GP	GP F30S
Untreated	CCJ046	10	6177	0.0138878	G->A	Transition	GP	GP D46N
Untreated	CCJ046	10	6178	0.0145463	A->G	Transition	GP	GP D46G
Untreated	CCJ046	10	6329	0.0142956	C->T	Transition	GP	GP: V96
Untreated	CCJ046	10	6424	0.0244194	T->C	Transition	GP	GP I128T
Untreated	CCJ046	10	6668	0.0109115	C->T	Transition	GP	GP: S209
Untreated	CCJ046	10	6758	0.020718	C->T	Transition	GP	GP: T239
Untreated	CCJ046	10	6856	0.0100719	T->C	Transition	GP	GP L272P
Untreated	CCJ046	10	6872	0.0191395	C->A	Transversion	GP	GP N277K
Untreated	CCJ046	10	6888	0.012836	A->G	Transition	GP	GP T283A
Untreated	CCJ046	10	7046	0.0109273	G->C	Transversion	GP	-
Untreated	CCJ046	10	7118	0.0101315	G->A	Transition	GP	-
Untreated	CCJ046	10	7232	0.0142519	T->C	Transition	GP	GP S398P
Untreated	CCJ046	10	7373	0.0108876	C->T	Transition	GP	GP P445S
Untreated	CCJ046	10	7448	0.0120278	G->A	Transition	GP	GP E470K
Untreated	CCJ046	10	7490	0.0167673	A->G	Transition	GP	GP T484A
Untreated	CCJ046	10	7668	0.0221728	C->T	Transition	GP	GP T543I
Untreated	CCJ046	10	7754	0.0141792	C->T	Transition	GP	GP: L572
Untreated	CCJ046	10	7800	0.0705866	A->G	Transition	GP	GP K587R
Untreated	CCJ046	10	8557	0.013279	T->C	Transition	VP30	VP30 S16P
Untreated	CCJ046	10	9390	0.0102626	A->G	Transition	VP30-VP24	-
Untreated	CCJ046	10	9444	0.0124143	T->C	Transition	VP30-VP24	-
Untreated	CCJ046	10	9907	0.0177459	T->C	Transition	VP30-VP24	-
Untreated	CCJ046	10	10148	0.0108867	T->C	Transition	VP30-VP24	-
Untreated	CCJ046	10	10235	0.0342608	A->C	Transversion	VP30-VP24	-
Untreated	CCJ046	10	10409	0.0100361	T->C	Transition	VP24	VP24 V21A
Untreated	CCJ046	10	10941	0.0154684	G->A	Transition	VP24	VP24: V198
Untreated	CCJ046	10	10959	0.0165794	C->T	Transition	VP24	VP24: D204
Untreated	CCJ046	10	11264	0.018281	C->T	Transition	VP24-L	-
Untreated	CCJ046	10	11607	0.0150031	A->G	Transition	L	L: P8
Untreated	CCJ046	10	11913	0.0205995	T->C	Transition	L	L: A110
Untreated	CCJ046	10	12143	0.0154197	A->T	Transversion	L	L Y187F
Untreated	CCJ046	10	13116	0.0184309	T->G	Transversion	L	L S511R
Untreated	CCJ046	10	13623	0.012468	T->C	Transition	L	L: N680
Untreated	CCJ046	10	14581	0.0528631	A->G	Transition	L	L I1000V
Untreated	CCJ046	10	15851	0.0706984	T->C	Transition	L	L L1423P
Untreated	CCJ046	10	16170	0.0532659	T->C	Transition	L	L: F1529
Untreated	CCJ046	10	16240	0.0122667	T->C	Transition	L	L S1553P
Untreated	CCJ046	10	16611	0.0110541	A->G	Transition	L	L: E1676
Untreated	CCJ046	10	16889	0.0151254	A->G	Transition	L	L Q1769R
Untreated	CCJ046	10	18574	0.0156261	A->G	Transition	5'	-
Untreated	CCL053	5	47	0.0147866	A->G	Transition	3'	-
Untreated	CCL053	5	197	0.0103895	C->T	Transition	3'	-
Untreated	CCL053	5	289	0.020662	T->C	Transition	3'	-
Untreated	CCL053	5	637	0.0148546	C->T	Transition	NP	NP: I55
Untreated	CCL053	5	724	0.0307112	A->G	Transition	NP	NP: G84
Untreated	CCL053	5	2328	0.011205	T->C	Transition	NP	NP L619P
Untreated	CCL053	5	3189	0.0102112	C->T	Transition	VP35	VP35 P20S
Untreated	CCL053	5	3393	0.0108639	A->G	Transition	VP35	VP35 T88A
Untreated	CCL053	5	3831	0.0235485	T->C	Transition	VP35	VP35 F234L
Untreated	CCL053	5	4414	0.0340136	T->G	Transversion	VP35-VP40	-
Untreated	CCL053	5	4462	0.0134137	G->T	Transversion	VP35-VP40	-
Untreated	CCL053	5	4589	0.0163499	G->A	Transition	VP40	VP40: L36
Untreated	CCL053	5	6177	0.0125092	G->A	Transition	GP	GP D46N
Untreated	CCL053	5	6668	0.0118564	C->T	Transition	GP	GP: S209
Untreated	CCL053	5	7371	0.0119801	A->G	Transition	GP	GP D444G
Untreated	CCL053	5	7668	0.0248068	C->T	Transition	GP	GP T543I
Untreated	CCL053	5	7800	0.0494988	A->G	Transition	GP	GP K587R
Untreated	CCL053	5	8063	0.0102403	T->G	Transversion	GP	GP F675V
Untreated	CCL053	5	9319	0.0102006	G->A	Transition	VP30	VP30 E270K
Untreated	CCL053	5	10695	0.0120256	A->G	Transition	VP24	VP24: G116
Untreated	CCL053	5	10770	0.0172119	G->A	Transition	VP24	VP24: K141
Untreated	CCL053	5	11694	0.0109781	T->C	Transition	L	L: N37
Untreated	CCL053	5	13893	0.0141314	G->A	Transition	L	L: R770
Untreated	CCL053	5	14317	0.0177398	T->C	Transition	L	L S912P
Untreated	CCL053	5	15246	0.0104945	G->A	Transition	L	L: L1221
Untreated	CCL053	5	15424	0.0180663	G->T	Transversion	L	L A1281S
Untreated	CCL053	5	16051	0.016413	T->G	Transversion	L	L F1490V
Untreated	CCL053	5	16610	0.0121546	A->G	Transition	L	L E1676G
Untreated	CCL053	5	16672	0.0105489	G->A	Transition	L	L E1697K
Untreated	CCL053	5	16737	0.013444	A->C	Transversion	L	L: L1718
Untreated	CCL053	5	17050	0.0587789	A->C	Transversion	L	L I1823L
Untreated	CCL053	5	17472	0.0120184	T->C	Transition	L	L: F1963
Untreated	CCL053	7	47	0.0175616	A->G	Transition	3'	-
Untreated	CCL053	7	289	0.0125283	T->C	Transition	3'	-
Untreated	CCL053	7	637	0.0312231	C->T	Transition	NP	NP: I55
Untreated	CCL053	7	724	0.0282713	A->G	Transition	NP	NP: G84
Untreated	CCL053	7	3393	0.0116862	A->G	Transition	VP35	VP35 T88A
Untreated	CCL053	7	3831	0.0224353	T->C	Transition	VP35	VP35 F234L
Untreated	CCL053	7	4414	0.0295833	T->G	Transversion	VP35-VP40	-
Untreated	CCL053	7	4462	0.0135158	G->T	Transversion	VP35-VP40	-
Untreated	CCL053	7	4589	0.0120813	G->A	Transition	VP40	VP40: L36
Untreated	CCL053	7	6053	0.0172053	A->T	Transversion	GP	GP: G4
Untreated	CCL053	7	6177	0.0135574	G->A	Transition	GP	GP D46N
Untreated	CCL053	7	6231	0.0186459	T->C	Transition	GP	GP S64P
Untreated	CCL053	7	6424	0.0148278	T->C	Transition	GP	GP I128T
Untreated	CCL053	7	6668	0.0149506	C->T	Transition	GP	GP: S209
Untreated	CCL053	7	7371	0.0112811	A->G	Transition	GP	GP D444G
Untreated	CCL053	7	7668	0.0277083	C->T	Transition	GP	GP T543I
Untreated	CCL053	7	7800	0.0504877	A->G	Transition	GP	GP K587R
Untreated	CCL053	7	8063	0.012281	T->G	Transversion	GP	GP F675V
Untreated	CCL053	7	10047	0.0129042	A->G	Transition	VP30-VP24	-
Untreated	CCL053	7	10770	0.0165524	G->A	Transition	VP24	VP24: K141
Untreated	CCL053	7	11694	0.0113003	T->C	Transition	L	L: N37
Untreated	CCL053	7	13440	0.0103191	G->A	Transition	L	L: E619
Untreated	CCL053	7	13893	0.0112916	G->A	Transition	L	L: R770
Untreated	CCL053	7	14317	0.0138337	T->C	Transition	L	L S912P
Untreated	CCL053	7	14640	0.0132707	A->G	Transition	L	L: L1019
Untreated	CCL053	7	15246	0.0215454	G->A	Transition	L	L: L1221
Untreated	CCL053	7	16051	0.034162	T->G	Transversion	L	L F1490V
Untreated	CCL053	7	16610	0.0105228	A->G	Transition	L	L E1676G
Untreated	CCL053	7	16672	0.0477746	G->A	Transition	L	L E1697K
Untreated	CCL053	7	16737	0.0108177	A->C	Transversion	L	L: L1718
Untreated	CCL053	7	17050	0.053449	A->C	Transversion	L	L I1823L
Untreated	CCL053	7	17472	0.0158646	T->C	Transition	L	L: F1963
Untreated	CCL053	9	47	0.12997	A->G	Transition	3'	-
Untreated	CCL053	9	232	0.0362927	T->C	Transition	3'	-
Untreated	CCL053	9	460	0.0359043	A->G	Transition	3'	-
Untreated	CCL053	9	637	0.049395	C->T	Transition	NP	NP: I55
Untreated	CCL053	9	724	0.0296004	A->G	Transition	NP	NP: G84
Untreated	CCL053	9	811	0.0389169	G->A	Transition	NP	NP: V113
Untreated	CCL053	9	1008	0.0330659	C->T	Transition	NP	NP A179V
Untreated	CCL053	9	1351	0.0418121	T->C	Transition	NP	NP: A293
Untreated	CCL053	9	1357	0.0276404	C->T	Transition	NP	NP: F295
Untreated	CCL053	9	1378	0.0242253	T->C	Transition	NP	NP: S302
Untreated	CCL053	9	1690	0.0325411	A->C	Transversion	NP	NP E406D
Untreated	CCL053	9	1839	0.0129621	T->C	Transition	NP	NP V456A
Untreated	CCL053	9	2253	0.0349062	A->G	Transition	NP	NP D594G
Untreated	CCL053	9	2264	0.034498	A->C	Transversion	NP	NP N598H
Untreated	CCL053	9	2459	0.0217929	G->A	Transition	NP	NP A663T
Untreated	CCL053	9	2702	0.0126686	T->G	Transversion	NP-VP35	-
Untreated	CCL053	9	2924	0.0121894	T->C	Transition	NP-VP35	-
Untreated	CCL053	9	3158	0.0136968	T->C	Transition	VP35	VP35: H9
Untreated	CCL053	9	3189	0.0145568	C->T	Transition	VP35	VP35 P20S
Untreated	CCL053	9	3203	0.0171342	T->C	Transition	VP35	VP35: L24
Untreated	CCL053	9	3831	0.0190072	T->C	Transition	VP35	VP35 F234L
Untreated	CCL053	9	4414	0.0259026	T->G	Transversion	VP35-VP40	-
Untreated	CCL053	9	4589	0.0159915	G->A	Transition	VP40	VP40: L36
Untreated	CCL053	9	5489	0.0145329	C->T	Transition	VP40-GP	-
Untreated	CCL053	9	6053	0.0479127	A->T	Transversion	GP	GP: G4
Untreated	CCL053	9	6230	0.0145751	A->G	Transition	GP	GP: R63
Untreated	CCL053	9	6231	0.0101725	T->C	Transition	GP	GP S64P
Untreated	CCL053	9	6332	0.0101777	T->C	Transition	GP	GP: N97
Untreated	CCL053	9	6424	0.0132694	T->C	Transition	GP	GP I128T
Untreated	CCL053	9	6491	0.0138818	T->C	Transition	GP	GP: F150
Untreated	CCL053	9	6616	0.010701	T->C	Transition	GP	GP F192S
Untreated	CCL053	9	7382	0.0157602	A->G	Transition	GP	GP T448A
Untreated	CCL053	9	7668	0.0310127	C->T	Transition	GP	GP T543I
Untreated	CCL053	9	7720	0.0143632	G->A	Transition	GP	GP: L560
Untreated	CCL053	9	7800	0.0700252	A->G	Transition	GP	GP K587R
Untreated	CCL053	9	8724	0.0118407	T->C	Transition	VP30	VP30: C71
Untreated	CCL053	9	9544	0.0117867	T->C	Transition	VP30-VP24	-
Untreated	CCL053	9	10047	0.016039	A->G	Transition	VP30-VP24	-
Untreated	CCL053	9	10278	0.0113543	G->C	Transversion	VP30-VP24	-
Untreated	CCL053	9	10695	0.0135246	A->G	Transition	VP24	VP24: G116
Untreated	CCL053	9	10770	0.0195099	G->A	Transition	VP24	VP24: K141
Untreated	CCL053	9	13893	0.0628729	G->A	Transition	L	L: R770
Untreated	CCL053	9	15559	0.0113179	T->C	Transition	L	L F1326L
Untreated	CCL053	9	15843	0.0572866	A->G	Transition	L	L: G1420
Untreated	CCL053	9	16170	0.0127919	T->C	Transition	L	L: F1529
Untreated	CCL053	9	16610	0.0142871	A->G	Transition	L	L E1676G
Untreated	CCL053	9	16672	0.0125863	G->A	Transition	L	L E1697K
Untreated	CCL053	9	16737	0.0138772	A->C	Transversion	L	L: L1718
Untreated	CCL053	9	17050	0.0313907	A->C	Transversion	L	L I1823L
Untreated	CCL053	9	17472	0.0105351	T->C	Transition	L	L: F1963
100mg	CA470	5	47	0.0502685	A->G	Transition	3'	-
100mg	CA470	5	58	0.0199703	G->A	Transition	3'	-
100mg	CA470	5	75	0.0125474	C->T	Transition	3'	-
100mg	CA470	5	108	0.0192935	G->A	Transition	3'	-
100mg	CA470	5	116	0.0220766	T->G	Transversion	3'	-
100mg	CA470	5	231	0.0186367	C->T	Transition	3'	-
100mg	CA470	5	270	0.0143933	C->T	Transition	3'	-
100mg	CA470	5	279	0.0112415	C->T	Transition	3'	-
100mg	CA470	5	326	0.0149115	A->G	Transition	3'	-
100mg	CA470	5	327	0.0179782	C->T	Transition	3'	-
100mg	CA470	5	367	0.0223035	A->C	Transversion	3'	-
100mg	CA470	5	376	0.015829	C->T	Transition	3'	-
100mg	CA470	5	383	0.0194031	G->A	Transition	3'	-
100mg	CA470	5	412	0.0114099	G->A	Transition	3'	-
100mg	CA470	5	519	0.0110698	C->T	Transition	NP	NP S16F
100mg	CA470	5	526	0.0158558	G->A	Transition	NP	NP M18I
100mg	CA470	5	527	0.0138261	G->A	Transition	NP	NP D19N
100mg	CA470	5	554	0.0176652	C->T	Transition	NP	NP: L28
100mg	CA470	5	556	0.0170122	G->A	Transition	NP	NP: L28
100mg	CA470	5	571	0.0121725	G->A	Transition	NP	NP: G33
100mg	CA470	5	596	0.0110578	G->A	Transition	NP	NP V42M
100mg	CA470	5	653	0.0255996	G->A	Transition	NP	NP A61T
100mg	CA470	5	747	0.0154641	G->A	Transition	NP	NP S92N
100mg	CA470	5	749	0.0121856	G->A	Transition	NP	NP G93S
100mg	CA470	5	760	0.0174721	G->A	Transition	NP	NP: K96
100mg	CA470	5	807	0.0193202	G->A	Transition	NP	NP G112E
100mg	CA470	5	808	0.0175839	G->A	Transition	NP	NP: G112
100mg	CA470	5	872	0.019414	G->A	Transition	NP	NP A134T
100mg	CA470	5	895	0.0175221	G->A	Transition	NP	NP: T141
100mg	CA470	5	909	0.0192824	C->T	Transition	NP	NP A146V
100mg	CA470	5	921	0.0172816	T->C	Transition	NP	NP L150P
100mg	CA470	5	973	0.0110405	C->T	Transition	NP	NP: C167
100mg	CA470	5	1081	0.0194424	G->A	Transition	NP	NP M203I
100mg	CA470	5	1115	0.0147839	C->T	Transition	NP	NP H215Y
100mg	CA470	5	1123	0.0125057	G->A	Transition	NP	NP: G217
100mg	CA470	5	1136	0.0133485	G->A	Transition	NP	NP A222T
100mg	CA470	5	1150	0.0163681	C->T	Transition	NP	NP: A226
100mg	CA470	5	1179	0.018726	C->T	Transition	NP	NP A236V
100mg	CA470	5	1341	0.010506	G->A	Transition	NP	NP G290E
100mg	CA470	5	1369	0.0163074	G->A	Transition	NP	NP: L299
100mg	CA470	5	1446	0.0147697	C->T	Transition	NP	NP A325V
100mg	CA470	5	1469	0.0234365	G->A	Transition	NP	NP V333I
100mg	CA470	5	1508	0.0150659	G->A	Transition	NP	NP A346T
100mg	CA470	5	1548	0.0175837	C->T	Transition	NP	NP S359F
100mg	CA470	5	1582	0.012669	G->A	Transition	NP	NP: Q370
100mg	CA470	5	1722	0.0139887	G->A	Transition	NP	NP S417N
100mg	CA470	5	1731	0.0226505	A->C	Transversion	NP	NP Y420S
100mg	CA470	5	1763	0.0100412	C->T	Transition	NP	NP P431S
100mg	CA470	5	1934	0.0177042	G->A	Transition	NP	NP D488N
100mg	CA470	5	1959	0.0181993	C->T	Transition	NP	NP P496L
100mg	CA470	5	1965	0.0197113	C->T	Transition	NP	NP P498L
100mg	CA470	5	2001	0.0178508	G->A	Transition	NP	NP S510N
100mg	CA470	5	2008	0.0150108	G->A	Transition	NP	NP: K512
100mg	CA470	5	2024	0.0145108	G->A	Transition	NP	NP G518S
100mg	CA470	5	2067	0.0103878	C->T	Transition	NP	NP P532L
100mg	CA470	5	2070	0.0140826	G->A	Transition	NP	NP R533H
100mg	CA470	5	2073	0.0266802	G->A	Transition	NP	NP R534K
100mg	CA470	5	2101	0.0110063	C->T	Transition	NP	NP: L543
100mg	CA470	5	2134	0.0224328	C->T	Transition	NP	NP: G554
100mg	CA470	5	2145	0.0296057	C->T	Transition	NP	NP P558L
100mg	CA470	5	2224	0.0186528	G->A	Transition	NP	NP: L584
100mg	CA470	5	2246	0.0114331	G->A	Transition	NP	NP D592N
100mg	CA470	5	2306	0.0184584	G->A	Transition	NP	NP D612N
100mg	CA470	5	2323	0.018089	A->G	Transition	NP	NP: K617
100mg	CA470	5	2336	0.0122198	G->A	Transition	NP	NP D622N
100mg	CA470	5	2373	0.0153977	G->A	Transition	NP	NP R634K
100mg	CA470	5	2450	0.0136074	C->T	Transition	NP	NP P660S
100mg	CA470	5	2516	0.0107424	G->A	Transition	NP	NP G682S
100mg	CA470	5	2753	0.0114587	C->T	Transition	NP-VP35	-
100mg	CA470	5	2898	0.0119367	C->T	Transition	NP-VP35	-
100mg	CA470	5	3238	0.029802	G->A	Transition	VP35	VP35 R36K
100mg	CA470	5	4628	0.0146642	A->G	Transition	VP40	VP40: P49
100mg	CA470	5	4832	0.0131904	T->C	Transition	VP40	VP40: A117
100mg	CA470	5	4841	0.013624	T->C	Transition	VP40	VP40: T120
100mg	CA470	5	5777	0.0103347	G->A	Transition	VP40-GP	-
100mg	CA470	5	6178	0.0114528	A->G	Transition	GP	GP D46G
100mg	CA470	5	6424	0.0223311	T->C	Transition	GP	GP I128T
100mg	CA470	5	6427	0.0158116	G->A	Transition	GP	GP R129Q
100mg	CA470	5	6666	0.0123235	T->C	Transition	GP	GP S209P
100mg	CA470	5	7668	0.0219228	C->T	Transition	GP	GP T543I
100mg	CA470	5	7800	0.0419847	A->G	Transition	GP	GP K587R
100mg	CA470	5	7834	0.0128555	C->T	Transition	GP	GP: G598
100mg	CA470	5	8021	0.0129114	A->C	Transversion	GP	GP I661L
100mg	CA470	5	8591	0.0104336	G->A	Transition	VP30	VP30 R27Q
100mg	CA470	5	9393	0.0453196	C->T	Transition	VP30-VP24	-
100mg	CA470	5	9434	0.0126944	T->C	Transition	VP30-VP24	-
100mg	CA470	5	9444	0.0151332	T->C	Transition	VP30-VP24	-
100mg	CA470	5	9794	0.0135028	T->C	Transition	VP30-VP24	-
100mg	CA470	5	10269	0.014118	T->C	Transition	VP30-VP24	-
100mg	CA470	5	11141	0.0200102	T->G	Transversion	VP24-L	-
100mg	CA470	5	12470	0.012824	T->A	Transversion	L	L F296Y
100mg	CA470	5	12519	0.0115824	C->T	Transition	L	L: T312
100mg	CA470	5	14444	0.010747	A->C	Transversion	L	L K954T
100mg	CA470	5	14446	0.0117536	A->G	Transition	L	L N955D
100mg	CA470	5	15132	0.0140213	C->T	Transition	L	L: S1183
100mg	CA470	5	15171	0.0140395	G->A	Transition	L	L: R1196
100mg	CA470	5	15646	0.0103793	G->A	Transition	L	L V1355I
100mg	CA470	5	16025	0.0100838	G->A	Transition	L	L R1481Q
100mg	CA470	5	17641	0.0155566	A->G	Transition	L	L S2020G
100mg	CA470	5	17905	0.0463172	A->G	Transition	L	L S2108G
100mg	CA470	5	18420	0.0115223	G->A	Transition	5'	-
100mg	CA470	5	18574	0.0167233	A->G	Transition	5'	-
100mg	CA470	9	30	0.0276937	A->G	Transition	3'	-
100mg	CA470	9	47	0.0387479	A->G	Transition	3'	-
100mg	CA470	9	48	0.0157371	A->G	Transition	3'	-
100mg	CA470	9	145	0.0259585	G->A	Transition	3'	-
100mg	CA470	9	212	0.0227297	G->A	Transition	3'	-
100mg	CA470	9	242	0.0343149	C->T	Transition	3'	-
100mg	CA470	9	249	0.0419477	C->T	Transition	3'	-
100mg	CA470	9	272	0.0394532	G->A	Transition	3'	-
100mg	CA470	9	348	0.0100789	G->A	Transition	3'	-
100mg	CA470	9	367	0.0243868	A->C	Transversion	3'	-
100mg	CA470	9	383	0.0362367	G->A	Transition	3'	-
100mg	CA470	9	402	0.0288037	C->T	Transition	3'	-
100mg	CA470	9	431	0.0110553	G->A	Transition	3'	-
100mg	CA470	9	447	0.0344007	C->T	Transition	3'	-
100mg	CA470	9	562	0.038274	T->C	Transition	NP	NP: V30
100mg	CA470	9	580	0.035801	G->A	Transition	NP	NP: R36
100mg	CA470	9	718	0.0326473	C->T	Transition	NP	NP: Y82
100mg	CA470	9	772	0.0336353	G->A	Transition	NP	NP: G100
100mg	CA470	9	862	0.0210372	G->A	Transition	NP	NP: K130
100mg	CA470	9	875	0.0344171	G->A	Transition	NP	NP A135T
100mg	CA470	9	892	0.0254317	G->A	Transition	NP	NP: E140
100mg	CA470	9	898	0.0426292	T->C	Transition	NP	NP: T142
100mg	CA470	9	940	0.0255109	C->T	Transition	NP	NP: F156
100mg	CA470	9	960	0.0323773	G->A	Transition	NP	NP G163E
100mg	CA470	9	973	0.0160953	C->T	Transition	NP	NP: C167
100mg	CA470	9	1038	0.0299526	C->T	Transition	NP	NP A189V
100mg	CA470	9	1078	0.0399481	G->A	Transition	NP	NP: L202
100mg	CA470	9	1162	0.0213222	G->A	Transition	NP	NP: V230
100mg	CA470	9	1177	0.0382092	G->A	Transition	NP	NP: V235
100mg	CA470	9	1196	0.0122971	G->A	Transition	NP	NP G242S
100mg	CA470	9	1250	0.024744	G->A	Transition	NP	NP G260R
100mg	CA470	9	1297	0.0334641	G->A	Transition	NP	NP: E275
100mg	CA470	9	1336	0.0317961	G->A	Transition	NP	NP: K288
100mg	CA470	9	1345	0.0247805	G->A	Transition	NP	NP: E291
100mg	CA470	9	1373	0.0238446	C->T	Transition	NP	NP L301F
100mg	CA470	9	1396	0.0375276	G->A	Transition	NP	NP: E308
100mg	CA470	9	1502	0.0354436	G->A	Transition	NP	NP E344K
100mg	CA470	9	1561	0.033717	C->T	Transition	NP	NP: D363
100mg	CA470	9	1667	0.0363396	G->A	Transition	NP	NP E399K
100mg	CA470	9	1675	0.0120507	G->A	Transition	NP	NP: L401
100mg	CA470	9	1728	0.0298345	C->T	Transition	NP	NP P419L
100mg	CA470	9	1747	0.0140172	C->T	Transition	NP	NP: D425
100mg	CA470	9	1752	0.0384742	C->T	Transition	NP	NP P427L
100mg	CA470	9	1792	0.0394834	T->C	Transition	NP	NP: H440
100mg	CA470	9	1860	0.0308642	G->A	Transition	NP	NP G463E
100mg	CA470	9	1915	0.0289819	C->T	Transition	NP	NP: D481
100mg	CA470	9	1981	0.0346643	G->A	Transition	NP	NP: K503
100mg	CA470	9	2008	0.0372439	G->A	Transition	NP	NP: K512
100mg	CA470	9	2014	0.0366125	G->A	Transition	NP	NP: Q514
100mg	CA470	9	2024	0.0355131	G->A	Transition	NP	NP G518S
100mg	CA470	9	2046	0.0362694	C->T	Transition	NP	NP P525L
100mg	CA470	9	2096	0.0366453	C->T	Transition	NP	NP P542S
100mg	CA470	9	2115	0.0404864	G->A	Transition	NP	NP R548K
100mg	CA470	9	2153	0.042797	C->T	Transition	NP	NP: L561
100mg	CA470	9	2203	0.0236277	G->A	Transition	NP	NP: E577
100mg	CA470	9	2224	0.0515991	G->A	Transition	NP	NP: L584
100mg	CA470	9	2268	0.0411	G->A	Transition	NP	NP R599H
100mg	CA470	9	2281	0.0113122	C->T	Transition	NP	NP: V603
100mg	CA470	9	2324	0.0288158	G->A	Transition	NP	NP E618K
100mg	CA470	9	2327	0.0502475	C->T	Transition	NP	NP L619F
100mg	CA470	9	2341	0.0323864	G->A	Transition	NP	NP: E623
100mg	CA470	9	2347	0.0121951	A->T	Transversion	NP	NP Q625H
100mg	CA470	9	2394	0.0407536	C->T	Transition	NP	NP T641I
100mg	CA470	9	2404	0.0231792	A->G	Transition	NP	NP: E644
100mg	CA470	9	2408	0.0150007	T->C	Transition	NP	NP S646P
100mg	CA470	9	2419	0.0250098	G->A	Transition	NP	NP: E649
100mg	CA470	9	2435	0.0375734	C->T	Transition	NP	NP: L655
100mg	CA470	9	2491	0.0187842	G->A	Transition	NP	NP: E673
100mg	CA470	9	2518	0.010051	C->T	Transition	NP	NP: G682
100mg	CA470	9	2907	0.0102123	C->T	Transition	NP-VP35	-
100mg	CA470	9	3152	0.0161295	G->A	Transition	VP35	VP35: R7
100mg	CA470	9	3200	0.024554	G->A	Transition	VP35	VP35: E23
100mg	CA470	9	3221	0.0120118	G->A	Transition	VP35	VP35: E30
100mg	CA470	9	3238	0.015382	G->A	Transition	VP35	VP35 R36K
100mg	CA470	9	3283	0.0100708	G->A	Transition	VP35	VP35 G51E
100mg	CA470	9	4628	0.0129165	A->G	Transition	VP40	VP40: P49
100mg	CA470	9	4832	0.0157783	T->C	Transition	VP40	VP40: A117
100mg	CA470	9	4841	0.012183	T->C	Transition	VP40	VP40: T120
100mg	CA470	9	5153	0.0102799	G->A	Transition	VP40	VP40: K224
100mg	CA470	9	6178	0.022789	A->G	Transition	GP	GP D46G
100mg	CA470	9	6424	0.0343663	T->C	Transition	GP	GP I128T
100mg	CA470	9	6427	0.0230847	G->A	Transition	GP	GP R129Q
100mg	CA470	9	6666	0.0122191	T->C	Transition	GP	GP S209P
100mg	CA470	9	7269	0.0112784	C->T	Transition	GP	GP T410I
100mg	CA470	9	7474	0.010299	G->A	Transition	GP	GP: L478
100mg	CA470	9	7668	0.0237983	C->T	Transition	GP	GP T543I
100mg	CA470	9	7800	0.0420609	A->G	Transition	GP	GP K587R
100mg	CA470	9	7834	0.0154955	C->T	Transition	GP	GP: G598
100mg	CA470	9	8002	0.0457306	T->G	Transversion	GP	GP: G654
100mg	CA470	9	8021	0.0145981	A->C	Transversion	GP	GP I661L
100mg	CA470	9	9393	0.0365142	C->T	Transition	VP30-VP24	-
100mg	CA470	9	9444	0.0129048	T->C	Transition	VP30-VP24	-
100mg	CA470	9	9794	0.0150997	T->C	Transition	VP30-VP24	-
100mg	CA470	9	10269	0.0121448	T->C	Transition	VP30-VP24	-
100mg	CA470	9	11141	0.0211985	T->G	Transversion	VP24-L	-
100mg	CA470	9	11182	0.0105298	A->G	Transition	VP24-L	-
100mg	CA470	9	14319	0.0106954	C->T	Transition	L	L: S912
100mg	CA470	9	14652	0.011162	T->C	Transition	L	L: T1023
100mg	CA470	9	14763	0.0132174	C->T	Transition	L	L: I1060
100mg	CA470	9	14992	0.0110633	C->T	Transition	L	L Q1137X
100mg	CA470	9	15062	0.0119077	G->A	Transition	L	L G1160E
100mg	CA470	9	15079	0.0140967	G->A	Transition	L	L V1166M
100mg	CA470	9	15117	0.0109042	C->T	Transition	L	L: N1178
100mg	CA470	9	15183	0.01349	G->A	Transition	L	L: K1200
100mg	CA470	9	15236	0.0172749	C->T	Transition	L	L A1218V
100mg	CA470	9	15396	0.0100896	C->T	Transition	L	L: N1271
100mg	CA470	9	15499	0.0123755	C->T	Transition	L	L Q1306X
100mg	CA470	9	15724	0.0158298	G->A	Transition	L	L D1381N
100mg	CA470	9	15897	0.0111407	G->A	Transition	L	L: S1438
100mg	CA470	9	15943	0.0127636	C->T	Transition	L	L H1454Y
100mg	CA470	9	15953	0.0123578	C->T	Transition	L	L T1457I
100mg	CA470	9	16021	0.0149056	C->T	Transition	L	L L1480F
100mg	CA470	9	16071	0.0108425	C->T	Transition	L	L: T1496
100mg	CA470	9	16088	0.0133309	C->T	Transition	L	L P1502L
100mg	CA470	9	16170	0.0167512	T->C	Transition	L	L: F1529
100mg	CA470	9	16428	0.0105783	T->C	Transition	L	L: D1615
100mg	CA470	9	17641	0.0148268	A->G	Transition	L	L S2020G
100mg	CA470	9	17905	0.0448722	A->G	Transition	L	L S2108G
100mg	CA470	9	18420	0.0119593	G->A	Transition	5'	-
100mg	CA470	9	18574	0.015227	A->G	Transition	5'	-
100mg	CA470	7	44	0.0741676	G->A	Transition	3'	-
100mg	CA470	7	58	0.150969	G->A	Transition	3'	-
100mg	CA470	7	185	0.0410538	G->A	Transition	3'	-
100mg	CA470	7	249	0.0502867	C->T	Transition	3'	-
100mg	CA470	7	298	0.0848129	A->G	Transition	3'	-
100mg	CA470	7	431	0.0610556	G->A	Transition	3'	-
100mg	CA470	7	487	0.0742962	G->A	Transition	NP	NP: Q5
100mg	CA470	7	569	0.0766839	G->A	Transition	NP	NP G33R
100mg	CA470	7	664	0.0477454	T->G	Transversion	NP	NP D64E
100mg	CA470	7	675	0.0126109	G->A	Transition	NP	NP S68N
100mg	CA470	7	757	0.0472985	C->T	Transition	NP	NP: V95
100mg	CA470	7	760	0.0678055	G->A	Transition	NP	NP: K96
100mg	CA470	7	791	0.123125	G->A	Transition	NP	NP V107I
100mg	CA470	7	808	0.0140263	G->A	Transition	NP	NP: G112
100mg	CA470	7	823	0.0342809	G->A	Transition	NP	NP: E117
100mg	CA470	7	832	0.0772062	G->A	Transition	NP	NP: L120
100mg	CA470	7	836	0.0352645	G->A	Transition	NP	NP A122T
100mg	CA470	7	929	0.0654921	G->A	Transition	NP	NP A153T
100mg	CA470	7	992	0.0796994	C->T	Transition	NP	NP Q174X
100mg	CA470	7	1109	0.0197374	C->T	Transition	NP	NP: L213
100mg	CA470	7	1149	0.0674784	C->T	Transition	NP	NP A226V
100mg	CA470	7	1204	0.0442095	G->A	Transition	NP	NP: L244
100mg	CA470	7	1240	0.0364662	G->A	Transition	NP	NP: K256
100mg	CA470	7	1281	0.0849784	C->T	Transition	NP	NP A270V
100mg	CA470	7	1328	0.0210636	C->T	Transition	NP	NP: L286
100mg	CA470	7	1337	0.0686728	C->T	Transition	NP	NP H289Y
100mg	CA470	7	1345	0.0359957	G->A	Transition	NP	NP: E291
100mg	CA470	7	1725	0.0521133	G->A	Transition	NP	NP G418E
100mg	CA470	7	1763	0.069145	C->T	Transition	NP	NP P431S
100mg	CA470	7	1907	0.0824007	C->T	Transition	NP	NP P479S
100mg	CA470	7	1948	0.0585667	G->A	Transition	NP	NP: E492
100mg	CA470	7	2080	0.0715236	C->T	Transition	NP	NP: I536
100mg	CA470	7	2284	0.0121649	C->T	Transition	NP	NP: A604
100mg	CA470	7	2306	0.0360008	G->A	Transition	NP	NP D612N
100mg	CA470	7	2311	0.0440276	C->T	Transition	NP	NP: H613
100mg	CA470	7	2372	0.0782915	A->G	Transition	NP	NP R634G
100mg	CA470	7	2425	0.0820505	T->C	Transition	NP	NP: Y651
100mg	CA470	7	2601	0.0195983	G->A	Transition	NP	NP R710K
100mg	CA470	7	2907	0.0109975	C->T	Transition	NP-VP35	-
100mg	CA470	7	3145	0.0266262	A->G	Transition	VP35	VP35 K5R
100mg	CA470	7	3323	0.0273273	C->T	Transition	VP35	VP35: N64
100mg	CA470	7	4628	0.0114582	A->G	Transition	VP40	VP40: P49
100mg	CA470	7	4832	0.0122232	T->C	Transition	VP40	VP40: A117
100mg	CA470	7	4841	0.0111928	T->C	Transition	VP40	VP40: T120
100mg	CA470	7	6178	0.0126945	A->G	Transition	GP	GP D46G
100mg	CA470	7	6231	0.0103007	T->C	Transition	GP	GP S64P
100mg	CA470	7	6424	0.035896	T->C	Transition	GP	GP I128T
100mg	CA470	7	6427	0.0151869	G->A	Transition	GP	GP R129Q
100mg	CA470	7	6666	0.0123255	T->C	Transition	GP	GP S209P
100mg	CA470	7	7269	0.0224462	C->T	Transition	GP	GP T410I
100mg	CA470	7	7668	0.0166913	C->T	Transition	GP	GP T543I
100mg	CA470	7	7800	0.0366412	A->G	Transition	GP	GP K587R
100mg	CA470	7	8021	0.0112273	A->C	Transversion	GP	GP I661L
100mg	CA470	7	9393	0.0391222	C->T	Transition	VP30-VP24	-
100mg	CA470	7	9444	0.0134302	T->C	Transition	VP30-VP24	-
100mg	CA470	7	9794	0.0120491	T->C	Transition	VP30-VP24	-
100mg	CA470	7	10269	0.0195521	T->C	Transition	VP30-VP24	-
100mg	CA470	7	11141	0.0174143	T->G	Transversion	VP24-L	-
100mg	CA470	7	12519	0.0170921	C->T	Transition	L	L: T312
100mg	CA470	7	14652	0.0125143	T->C	Transition	L	L: T1023
100mg	CA470	7	14674	0.0185725	G->A	Transition	L	L A1031T
100mg	CA470	7	14828	0.0234618	G->A	Transition	L	L S1082N
100mg	CA470	7	14874	0.0119774	G->A	Transition	L	L: E1097
100mg	CA470	7	14949	0.0129859	G->A	Transition	L	L: E1122
100mg	CA470	7	14966	0.0183585	G->A	Transition	L	L G1128E
100mg	CA470	7	14991	0.0136437	G->A	Transition	L	L: E1136
100mg	CA470	7	15063	0.0169061	G->A	Transition	L	L: G1160
100mg	CA470	7	15124	0.0167581	C->T	Transition	L	L R1181X
100mg	CA470	7	15144	0.013086	G->A	Transition	L	L: G1187
100mg	CA470	7	15171	0.0166134	G->A	Transition	L	L: R1196
100mg	CA470	7	15250	0.0100634	T->C	Transition	L	L S1223P
100mg	CA470	7	15252	0.0181446	C->T	Transition	L	L: S1223
100mg	CA470	7	15269	0.0173258	C->T	Transition	L	L T1229I
100mg	CA550	5	171	0.483521	C->T	Transition	3'	-
100mg	CA550	5	628	0.0110888	C->T	Transition	NP	NP: C52
100mg	CA550	5	873	0.496371	T->C	Transition	NP	NP V134A
100mg	CA550	5	1148	0.0152468	G->A	Transition	NP	NP A226T
100mg	CA550	5	1358	0.0501226	G->A	Transition	NP	NP A296T
100mg	CA550	5	2900	0.0100161	G->A	Transition	NP-VP35	-
100mg	CA550	5	2916	0.0100616	T->C	Transition	NP-VP35	-
100mg	CA550	5	2927	0.0125774	C->T	Transition	NP-VP35	-
100mg	CA550	5	2973	0.0143923	C->T	Transition	NP-VP35	-
100mg	CA550	5	3070	0.0139071	A->G	Transition	NP-VP35	-
100mg	CA550	5	3279	0.0222033	C->T	Transition	VP35	VP35 P50S
100mg	CA550	5	3323	0.010742	C->T	Transition	VP35	VP35: N64
100mg	CA550	5	3482	0.0182074	A->G	Transition	VP35	VP35: L117
100mg	CA550	5	3581	0.0198693	G->A	Transition	VP35	VP35: R150
100mg	CA550	5	3588	0.0256006	G->A	Transition	VP35	VP35 A153T
100mg	CA550	5	3664	0.0160196	G->A	Transition	VP35	VP35 S178N
100mg	CA550	5	3794	0.0287333	G->A	Transition	VP35	VP35: K221
100mg	CA550	5	3819	0.0113062	C->T	Transition	VP35	VP35 H230Y
100mg	CA550	5	3920	0.0130478	G->A	Transition	VP35	VP35: Q263
100mg	CA550	5	3955	0.0154601	C->T	Transition	VP35	VP35 A275V
100mg	CA550	5	3982	0.0552455	C->T	Transition	VP35	VP35 P284L
100mg	CA550	5	4016	0.0136574	C->T	Transition	VP35	VP35: H295
100mg	CA550	5	4070	0.0150535	C->T	Transition	VP35	VP35: V313
100mg	CA550	5	4167	0.0199745	C->T	Transition	VP35-VP40	-
100mg	CA550	5	4182	0.01654	C->T	Transition	VP35-VP40	-
100mg	CA550	5	4185	0.0118852	A->C	Transversion	VP35-VP40	-
100mg	CA550	5	4204	0.0194692	C->T	Transition	VP35-VP40	-
100mg	CA550	5	4212	0.0431719	C->T	Transition	VP35-VP40	-
100mg	CA550	5	4334	0.0111214	G->A	Transition	VP35-VP40	-
100mg	CA550	5	4396	0.0112833	G->A	Transition	VP35-VP40	-
100mg	CA550	5	4422	0.0182478	G->A	Transition	VP35-VP40	-
100mg	CA550	5	4524	0.020064	G->A	Transition	VP40	VP40 A15T
100mg	CA550	5	4525	0.0121873	C->T	Transition	VP40	VP40 A15V
100mg	CA550	5	4586	0.0127315	C->T	Transition	VP40	VP40: F35
100mg	CA550	5	4659	0.0137812	C->T	Transition	VP40	VP40 H60Y
100mg	CA550	5	4706	0.0126961	A->G	Transition	VP40	VP40: E75
100mg	CA550	5	4847	0.0106158	C->T	Transition	VP40	VP40: T122
100mg	CA550	5	4958	0.0376588	G->A	Transition	VP40	VP40: E159
100mg	CA550	5	4968	0.011414	C->T	Transition	VP40	VP40 P163S
100mg	CA550	5	4980	0.015871	C->T	Transition	VP40	VP40: L167
100mg	CA550	5	5011	0.0182301	C->T	Transition	VP40	VP40 A177V
100mg	CA550	5	5161	0.0206159	G->A	Transition	VP40	VP40 S227N
100mg	CA550	5	5238	0.0205165	C->T	Transition	VP40	VP40 P253S
100mg	CA550	5	5359	0.0182614	G->A	Transition	VP40	VP40 G293E
100mg	CA550	5	5415	0.0216015	A->G	Transition	VP40	VP40 T312A
100mg	CA550	5	5470	0.0128375	T->C	Transition	VP40-GP	-
100mg	CA550	5	5572	0.0171904	A->G	Transition	VP40-GP	-
100mg	CA550	5	5649	0.013753	G->A	Transition	VP40-GP	-
100mg	CA550	5	5650	0.0140187	A->G	Transition	VP40-GP	-
100mg	CA550	5	5711	0.0108151	G->A	Transition	VP40-GP	-
100mg	CA550	5	5740	0.015238	C->T	Transition	VP40-GP	-
100mg	CA550	5	5783	0.0222964	A->G	Transition	VP40-GP	-
100mg	CA550	5	5813	0.0106553	G->A	Transition	VP40-GP	-
100mg	CA550	5	5818	0.0250738	G->A	Transition	VP40-GP	-
100mg	CA550	5	5829	0.0223195	A->C	Transversion	VP40-GP	-
100mg	CA550	5	5912	0.0115828	G->A	Transition	VP40-GP	-
100mg	CA550	5	6043	0.0151849	G->A	Transition	GP	GP G1D
100mg	CA550	5	6050	0.016924	A->G	Transition	GP	GP: T3
100mg	CA550	5	6082	0.0102666	A->G	Transition	GP	GP K14R
100mg	CA550	5	6086	0.0188168	G->A	Transition	GP	GP: R15
100mg	CA550	5	6141	0.0199199	C->T	Transition	GP	GP L34F
100mg	CA550	5	6155	0.0172662	C->T	Transition	GP	GP: H38
100mg	CA550	5	6189	0.0252308	C->A	Transversion	GP	GP L50I
100mg	CA550	5	6209	0.014331	G->A	Transition	GP	GP: L56
100mg	CA550	5	6304	0.0214069	G->A	Transition	GP	GP R88K
100mg	CA550	5	6332	0.0140059	T->C	Transition	GP	GP: N97
100mg	CA550	5	6361	0.0139044	G->A	Transition	GP	GP C107Y
100mg	CA550	5	6424	0.0284098	T->C	Transition	GP	GP I128T
100mg	CA550	5	6431	0.0185616	C->T	Transition	GP	GP: G130
100mg	CA550	5	6527	0.0224662	T->C	Transition	GP	GP: D162
100mg	CA550	5	6544	0.010298	T->C	Transition	GP	GP V168A
100mg	CA550	5	6559	0.0695422	C->T	Transition	GP	GP T173M
100mg	CA550	5	6639	0.0109942	G->A	Transition	GP	GP E200K
100mg	CA550	5	6714	0.0109496	G->A	Transition	GP	GP G225R
100mg	CA550	5	6878	0.0109047	A->T	Transversion	GP	GP E279D
100mg	CA550	5	6908	0.0137049	C->T	Transition	GP	GP: F289
100mg	CA550	5	6934	0.0143102	A->G	Transition	GP	-
100mg	CA550	5	7014	0.0133291	C->T	Transition	GP	-
100mg	CA550	5	7026	0.0158592	C->T	Transition	GP	-
100mg	CA550	5	7044	0.0630616	C->T	Transition	GP	-
100mg	CA550	5	7077	0.0138619	C->T	Transition	GP	-
100mg	CA550	5	7144	0.0140608	C->T	Transition	GP	GP: A368
100mg	CA550	5	7159	0.0168323	T->A	Transversion	GP	GP S373R
100mg	CA550	5	7188	0.0241996	A->T	Transversion	GP	GP Q383L
100mg	CA550	5	7373	0.0193097	C->T	Transition	GP	GP P445S
100mg	CA550	5	7393	0.0124813	C->T	Transition	GP	GP: P451
100mg	CA550	5	7408	0.0138847	G->A	Transition	GP	GP: E456
100mg	CA550	5	7464	0.0105875	G->A	Transition	GP	GP S475N
100mg	CA550	5	7487	0.0340944	A->G	Transition	GP	GP N483D
100mg	CA550	5	7668	0.0258453	C->T	Transition	GP	GP T543I
100mg	CA550	5	7785	0.0307053	C->T	Transition	GP	GP S582L
100mg	CA550	5	7800	0.116414	A->G	Transition	GP	GP K587R
100mg	CA550	5	7916	0.0176488	A->T	Transversion	GP	GP I626F
100mg	CA550	5	8096	0.0319318	G->A	Transition	GP-VP30	-
100mg	CA550	5	8306	0.0242406	G->A	Transition	GP-VP30	-
100mg	CA550	5	8328	0.0267356	G->A	Transition	GP-VP30	-
100mg	CA550	5	8437	0.0196013	C->T	Transition	GP-VP30	-
100mg	CA550	5	8637	0.0320962	G->A	Transition	VP30	VP30: R42
100mg	CA550	5	8723	0.0310351	G->A	Transition	VP30	VP30 C71Y
100mg	CA550	5	8980	0.0354354	G->A	Transition	VP30	VP30 D157N
100mg	CA550	5	8985	0.0312207	C->T	Transition	VP30	VP30: I158
100mg	CA550	5	9021	0.0219047	G->A	Transition	VP30	VP30: L170
100mg	CA550	5	9087	0.0300626	C->T	Transition	VP30	VP30: H192
100mg	CA550	5	9339	0.0328788	G->A	Transition	VP30	VP30: P276
100mg	CA550	5	9542	0.0190229	T->G	Transversion	VP30-VP24	-
100mg	CA550	5	9821	0.0286197	C->T	Transition	VP30-VP24	-
100mg	CA550	5	9856	0.0187686	T->C	Transition	VP30-VP24	-
100mg	CA550	5	9891	0.0350006	G->A	Transition	VP30-VP24	-
100mg	CA550	5	9913	0.0297094	G->A	Transition	VP30-VP24	-
100mg	CA550	5	9990	0.0365846	T->C	Transition	VP30-VP24	-
100mg	CA550	5	9991	0.0292606	C->G	Transversion	VP30-VP24	-
100mg	CA550	5	10289	0.0355394	G->A	Transition	VP30-VP24	-
100mg	CA550	5	10371	0.0330489	T->C	Transition	VP24	VP24: N8
100mg	CA550	5	11274	0.0104222	C->T	Transition	VP24-L	-
100mg	CA550	5	11544	0.0169621	T->C	Transition	VP24-L	-
100mg	CA550	5	12063	0.0131349	G->A	Transition	L	L: R160
100mg	CA550	5	12300	0.0131544	C->T	Transition	L	L: C239
100mg	CA550	5	12354	0.014075	G->A	Transition	L	L: E257
100mg	CA550	5	12360	0.0126305	G->A	Transition	L	L: E259
100mg	CA550	5	12453	0.0215601	G->A	Transition	L	L: G290
100mg	CA550	5	12491	0.0191846	C->T	Transition	L	L A303V
100mg	CA550	5	12606	0.0107734	T->G	Transversion	L	L: P341
100mg	CA550	5	12630	0.0252716	A->G	Transition	L	L: E349
100mg	CA550	5	12679	0.0118491	G->A	Transition	L	L E366K
100mg	CA550	5	12975	0.0208586	C->T	Transition	L	L: D464
100mg	CA550	5	13052	0.0140038	G->A	Transition	L	L R490K
100mg	CA550	5	13059	0.013315	C->T	Transition	L	L: C492
100mg	CA550	5	13155	0.0159185	C->T	Transition	L	L: N524
100mg	CA550	5	13195	0.0191361	G->A	Transition	L	L E538K
100mg	CA550	5	13280	0.0213432	C->T	Transition	L	L P566L
100mg	CA550	5	13306	0.011543	C->T	Transition	L	L L575F
100mg	CA550	5	13636	0.0142429	C->T	Transition	L	L L685F
100mg	CA550	5	13638	0.0133601	C->T	Transition	L	L: L685
100mg	CA550	5	13640	0.0189774	C->T	Transition	L	L T686I
100mg	CA550	5	13699	0.0121898	G->A	Transition	L	L G706R
100mg	CA550	5	13792	0.0227632	G->A	Transition	L	L A737T
100mg	CA550	5	13855	0.0189541	G->A	Transition	L	L D758N
100mg	CA550	5	13946	0.0132569	C->T	Transition	L	L P788L
100mg	CA550	5	14003	0.0115113	A->G	Transition	L	L N807S
100mg	CA550	5	14007	0.0230333	G->A	Transition	L	L: G808
100mg	CA550	5	14164	0.0103687	G->A	Transition	L	L A861T
100mg	CA550	5	14229	0.0100597	T->C	Transition	L	L: F882
100mg	CA550	5	14265	0.0121777	T->C	Transition	L	L: D894
100mg	CA550	5	14440	0.0105038	G->A	Transition	L	L A953T
100mg	CA550	5	14515	0.0133622	G->A	Transition	L	L D978N
100mg	CA550	5	14541	0.0110199	T->C	Transition	L	L: I986
100mg	CA550	5	14736	0.153016	A->C	Transversion	L	L: G1051
100mg	CA550	5	14864	0.0236007	T->C	Transition	L	L I1094T
100mg	CA550	5	16209	0.0482523	C->T	Transition	L	L: L1542
100mg	CA550	5	16611	0.0115203	A->G	Transition	L	L: E1676
100mg	CA550	5	16818	0.0177507	C->T	Transition	L	L: N1745
100mg	CA550	5	16880	0.0222547	C->T	Transition	L	L T1766I
100mg	CA550	5	16935	0.028637	C->T	Transition	L	L: D1784
100mg	CA550	5	16948	0.0549898	T->C	Transition	L	L Y1789H
100mg	CA550	5	17044	0.0405523	T->C	Transition	L	L W1821R
100mg	CA550	5	17064	0.018044	G->A	Transition	L	L: K1827
100mg	CA550	5	17142	0.0300841	T->C	Transition	L	L: F1853
100mg	CA550	5	17246	0.0190132	A->G	Transition	L	L Q1888R
100mg	CA550	5	17283	0.0246419	A->T	Transversion	L	L: I1900
100mg	CA550	5	17287	0.0217955	G->A	Transition	L	L D1902N
100mg	CA550	5	17607	0.0229969	A->G	Transition	L	L: S2008
100mg	CA550	5	17714	0.0102263	C->T	Transition	L	L T2044I
100mg	CA550	5	17824	0.020155	C->T	Transition	L	L: L2081
100mg	CA550	5	17910	0.0243506	G->A	Transition	L	L: R2109
100mg	CA550	5	18135	0.019524	A->G	Transition	L	L: R2184
100mg	CA550	5	18248	0.0179949	T->A	Transversion	5'	-
100mg	CA550	5	18437	0.0237333	C->T	Transition	5'	-
100mg	CA550	5	18472	0.0167746	C->T	Transition	5'	-
100mg	CA550	5	18482	0.0280895	T->C	Transition	5'	-
100mg	CA550	5	18574	0.0197222	A->G	Transition	5'	-
100mg	CA550	5	18821	0.0480961	T->C	Transition	5'	-
100mg	CA550	5	18873	0.0216424	G->A	Transition	5'	-
100mg	CA550	7	168	0.0170279	A->C	Transversion	3'	-
100mg	CA550	7	229	0.0135504	A->G	Transition	3'	-
100mg	CA550	7	3334	0.0163599	G->A	Transition	VP35	VP35 R68H
100mg	CA550	7	4139	0.0185861	A->G	Transition	VP35	VP35: G336
100mg	CA550	7	4926	0.449527	T->C	Transition	VP40	VP40: L149
100mg	CA550	7	5005	0.0149847	T->C	Transition	VP40	VP40 L175S
100mg	CA550	7	5967	0.20733	G->A	Transition	VP40-GP	-
100mg	CA550	7	6119	0.0100929	C->T	Transition	GP	GP: F26
100mg	CA550	7	7800	0.440567	G->A	Transition	GP	GP R587K
100mg	CA550	7	9727	0.088176	A->G	Transition	VP30-VP24	-
100mg	CA550	7	10269	0.0111502	T->C	Transition	VP30-VP24	-
100mg	CA550	7	11240	0.0193283	A->G	Transition	VP24-L	-
100mg	CA550	7	13821	0.0168936	C->T	Transition	L	L: T746
100mg	CA550	7	14227	0.195875	T->A	Transversion	L	L F882I
100mg	CA550	7	14317	0.0165091	T->C	Transition	L	L S912P
100mg	CA550	7	14451	0.0114234	T->C	Transition	L	L: P956
100mg	CA550	7	14873	0.0116849	A->G	Transition	L	L E1097G
100mg	CA550	7	15363	0.0107308	A->T	Transversion	L	L: S1260
100mg	CA550	7	17392	0.0111579	A->C	Transversion	L	L K1937Q
100mg	CA550	7	17953	0.0169182	A->T	Transversion	L	L T2124S
100mg	CA550	7	18026	0.0232187	C->T	Transition	L	L A2148V
100mg	CA550	7	18473	0.0774974	T->C	Transition	5'	-
100mg	CA550	7	18575	0.0159177	A->G	Transition	5'	-
100mg	CA550	8	47	0.0485629	A->G	Transition	3'	-
100mg	CA550	8	134	0.0225887	T->C	Transition	3'	-
100mg	CA550	8	211	0.0176694	T->C	Transition	3'	-
100mg	CA550	8	268	0.0152009	T->C	Transition	3'	-
100mg	CA550	8	865	0.0771774	A->G	Transition	NP	NP: R131
100mg	CA550	8	2306	0.0157849	G->A	Transition	NP	NP D612N
100mg	CA550	8	2846	0.0109597	A->G	Transition	NP-VP35	-
100mg	CA550	8	3368	0.0129592	T->A	Transversion	VP35	VP35 N79K
100mg	CA550	8	3794	0.0141862	G->A	Transition	VP35	VP35: K221
100mg	CA550	8	3821	0.010521	C->T	Transition	VP35	VP35: H230
100mg	CA550	8	4396	0.0113768	G->A	Transition	VP35-VP40	-
100mg	CA550	8	6189	0.0111661	C->A	Transversion	GP	GP L50I
100mg	CA550	8	6424	0.0158468	T->C	Transition	GP	GP I128T
100mg	CA550	8	6427	0.011991	G->A	Transition	GP	GP R129Q
100mg	CA550	8	6527	0.0451905	T->C	Transition	GP	GP: D162
100mg	CA550	8	7487	0.0804693	A->G	Transition	GP	GP N483D
100mg	CA550	8	7668	0.0128529	C->T	Transition	GP	GP T543I
100mg	CA550	8	7800	0.0718386	A->G	Transition	GP	GP K587R
100mg	CA550	8	9214	0.0116287	A->G	Transition	VP30	VP30 I235V
100mg	CA550	8	9348	0.0109404	C->T	Transition	VP30	VP30: C279
100mg	CA550	8	9493	0.0120952	T->C	Transition	VP30-VP24	-
100mg	CA550	8	9990	0.0151046	T->C	Transition	VP30-VP24	-
100mg	CA550	8	12630	0.0123661	A->G	Transition	L	L: E349
100mg	CA550	8	14317	0.0129185	T->C	Transition	L	L S912P
100mg	CA550	8	14444	0.0105477	A->C	Transversion	L	L K954T
100mg	CA550	8	14446	0.0113263	A->G	Transition	L	L N955D
100mg	CA550	8	14917	0.0116158	C->T	Transition	L	L: L1112
100mg	CA550	8	15786	0.0115937	A->G	Transition	L	L: Q1401
100mg	CA550	8	16170	0.0151878	T->C	Transition	L	L: F1529
100mg	CA550	8	16415	0.0124595	C->T	Transition	L	L T1611I
100mg	CA550	8	16611	0.0183349	A->G	Transition	L	L: E1676
100mg	CA550	8	16788	0.0157447	G->A	Transition	L	L: S1735
100mg	CA550	8	16948	0.0718987	T->C	Transition	L	L Y1789H
100mg	CA550	8	17044	0.0114294	T->C	Transition	L	L W1821R
100mg	CA550	8	17607	0.0602082	A->G	Transition	L	L: S2008
100mg	CA550	8	18787	0.0119794	C->T	Transition	5'	-
100mg	CB881	5	310	0.011809	C->T	Transition	3'	-
100mg	CB881	5	500	0.0313087	A->G	Transition	NP	NP T10A
100mg	CB881	5	1312	0.394849	G->A	Transition	NP	NP: K280
100mg	CB881	5	1476	0.0142751	T->C	Transition	NP	NP V335A
100mg	CB881	5	1986	0.40284	G->A	Transition	NP	NP G505E
100mg	CB881	5	2384	0.0878311	A->G	Transition	NP	NP S638G
100mg	CB881	5	2709	0.0214166	A->G	Transition	NP-VP35	-
100mg	CB881	5	2985	0.139839	C->T	Transition	NP-VP35	-
100mg	CB881	5	3083	0.012112	T->C	Transition	NP-VP35	-
100mg	CB881	5	3116	0.187784	C->T	Transition	NP-VP35	-
100mg	CB881	5	3589	0.0132522	C->T	Transition	VP35	VP35 A153V
100mg	CB881	5	3691	0.0122925	G->A	Transition	VP35	VP35 R187K
100mg	CB881	5	3795	0.012099	G->A	Transition	VP35	VP35 D222N
100mg	CB881	5	4152	0.0146769	G->A	Transition	VP35-VP40	-
100mg	CB881	5	4372	0.0121092	G->A	Transition	VP35-VP40	-
100mg	CB881	5	4386	0.0364022	A->G	Transition	VP35-VP40	-
100mg	CB881	5	4408	0.0125832	C->T	Transition	VP35-VP40	-
100mg	CB881	5	5085	0.0213815	C->T	Transition	VP40	VP40: L202
100mg	CB881	5	5118	0.0100146	C->T	Transition	VP40	VP40 R213C
100mg	CB881	5	5262	0.0102888	G->A	Transition	VP40	VP40 E261K
100mg	CB881	5	5325	0.0111744	C->T	Transition	VP40	VP40 P282S
100mg	CB881	5	5345	0.0162583	G->A	Transition	VP40	VP40: L288
100mg	CB881	5	5364	0.0134975	G->A	Transition	VP40	VP40 D295N
100mg	CB881	5	5368	0.0100306	C->T	Transition	VP40	VP40 P296L
100mg	CB881	5	5373	0.0114791	G->A	Transition	VP40	VP40 A298T
100mg	CB881	5	5540	0.0179503	G->A	Transition	VP40-GP	-
100mg	CB881	5	5600	0.012128	C->T	Transition	VP40-GP	-
100mg	CB881	5	5779	0.0126502	C->T	Transition	VP40-GP	-
100mg	CB881	5	6181	0.0198567	T->C	Transition	GP	GP V47A
100mg	CB881	5	6351	0.0104192	G->A	Transition	GP	GP A104T
100mg	CB881	5	6424	0.0399971	T->C	Transition	GP	GP I128T
100mg	CB881	5	6488	0.0151954	C->T	Transition	GP	GP: D149
100mg	CB881	5	6506	0.015424	G->A	Transition	GP	GP: E155
100mg	CB881	5	6592	0.0115525	T->C	Transition	GP	GP I184T
100mg	CB881	5	6630	0.0102117	C->T	Transition	GP	GP P197S
100mg	CB881	5	6674	0.0109503	C->T	Transition	GP	GP: G211
100mg	CB881	5	6734	0.014407	C->T	Transition	GP	GP: Y231
100mg	CB881	5	6978	0.0154415	G->A	Transition	GP	-
100mg	CB881	5	7115	0.0108343	G->A	Transition	GP	-
100mg	CB881	5	7300	0.0104872	C->T	Transition	GP	GP: P420
100mg	CB881	5	7488	0.0149851	A->C	Transversion	GP	GP N483T
100mg	CB881	5	7508	0.202036	G->A	Transition	GP	GP G490R
100mg	CB881	5	7668	0.0195096	C->T	Transition	GP	GP T543I
100mg	CB881	5	7717	0.0243841	G->A	Transition	GP	GP: Q559
100mg	CB881	5	7800	0.0192066	A->G	Transition	GP	GP K587R
100mg	CB881	5	8683	0.0102567	G->A	Transition	VP30	VP30 V58I
100mg	CB881	5	9099	0.0106818	G->A	Transition	VP30	VP30: E196
100mg	CB881	5	9282	0.0172504	T->A	Transversion	VP30	VP30: V257
100mg	CB881	5	9461	0.0132808	C->T	Transition	VP30-VP24	-
100mg	CB881	5	9544	0.0132675	T->C	Transition	VP30-VP24	-
100mg	CB881	5	9947	0.0103351	G->A	Transition	VP30-VP24	-
100mg	CB881	5	9999	0.0151762	T->G	Transversion	VP30-VP24	-
100mg	CB881	5	10022	0.0564008	C->T	Transition	VP30-VP24	-
100mg	CB881	5	10125	0.0160928	G->A	Transition	VP30-VP24	-
100mg	CB881	5	10245	0.0139775	C->T	Transition	VP30-VP24	-
100mg	CB881	5	10269	0.0178283	T->C	Transition	VP30-VP24	-
100mg	CB881	5	10279	0.0117674	A->G	Transition	VP30-VP24	-
100mg	CB881	5	10368	0.0112157	C->T	Transition	VP24	VP24: Y7
100mg	CB881	5	10402	0.0127305	G->A	Transition	VP24	VP24 G19R
100mg	CB881	5	10959	0.0127622	C->T	Transition	VP24	VP24: D204
100mg	CB881	5	10983	0.0112685	G->A	Transition	VP24	VP24: K212
100mg	CB881	5	11176	0.0305957	A->G	Transition	VP24-L	-
100mg	CB881	5	11791	0.0266991	T->G	Transversion	L	L L70V
100mg	CB881	5	12104	0.0211286	T->C	Transition	L	L V174A
100mg	CB881	5	12360	0.0105079	G->A	Transition	L	L: E259
100mg	CB881	5	12537	0.0171407	C->T	Transition	L	L: F318
100mg	CB881	5	12598	0.010058	C->T	Transition	L	L: L339
100mg	CB881	5	12893	0.0140845	G->A	Transition	L	L G437D
100mg	CB881	5	13125	0.015948	T->C	Transition	L	L: R514
100mg	CB881	5	13380	0.0100594	G->A	Transition	L	L: E599
100mg	CB881	5	13860	0.0103923	G->A	Transition	L	L: E759
100mg	CB881	5	13871	0.0207089	G->A	Transition	L	L S763N
100mg	CB881	5	13879	0.0118862	G->A	Transition	L	L D766N
100mg	CB881	5	14076	0.0628383	T->C	Transition	L	L: D831
100mg	CB881	5	14284	0.0553496	G->A	Transition	L	L A901T
100mg	CB881	5	14318	0.0838025	C->T	Transition	L	L S912F
100mg	CB881	5	14359	0.0391441	G->A	Transition	L	L D926N
100mg	CB881	5	14800	0.0634474	C->T	Transition	L	L: L1073
100mg	CB881	5	14876	0.051344	C->T	Transition	L	L A1098V
100mg	CB881	5	14922	0.357839	G->A	Transition	L	L: R1113
100mg	CB881	5	14959	0.0487505	C->T	Transition	L	L L1126F
100mg	CB881	5	15004	0.0405654	G->A	Transition	L	L V1141I
[truncated: 5,866 more rows]
