# Supplementary material for: Antiviral efficacy of favipiravir against Ebola virus: A translational study in cynomolgus macaques
Source: PLoS Med. 2018 Mar 27;15(3):e1002535. doi: 10.1371/journal.pmed.1002535 (PMC5870946; doi:10.1371/journal.pmed.1002535)
Supplement: S6 Table — (XLSX) [file pmed.1002535.s011.xlsx]

## Sheet: S6_Table
id	TIME	Y	CENS	GROUP	STUDY	TYPE
BB341E	5	6.94	0	0	P4-1	1
BB341E	5	4.68	0	0	P4-1	2
BB341E	7	7.07	0	0	P4-1	1
BB341E	7	5.03	0	0	P4-1	2
BB341E	9	6.8	0	0	P4-1	1
BB341E	9	3.24	0	0	P4-1	2
CA470	5	6.17	0	100	P4-1	1
CA470	5	3.36	0	100	P4-1	2
CA470	7	5.99	0	100	P4-1	1
CA470	7	2.56	0	100	P4-1	2
CA470	9	5.93	0	100	P4-1	1
CA470	9	1	1	100	P4-1	2
CA550	5	6.18	0	100	P4-1	1
CA550	5	3.01	0	100	P4-1	2
CA550	7	8	0	100	P4-1	1
CA550	7	4.75	0	100	P4-1	2
CA550	8	7.05	0	100	P4-1	1
CA550	8	5.32	0	100	P4-1	2
CA899	3	2.385795847	0	150	P4-2	1
CA899	3	1	1	150	P4-2	2
CA899	5	3.947510118	0	150	P4-2	1
CA899	5	1	1	150	P4-2	2
CA899	7	3.904723425	0	150	P4-2	1
CA899	7	1	1	150	P4-2	2
CA899	10	6.974668602	0	150	P4-2	1
CA899	10	3.992700761	0	150	P4-2	2
CA899	12	7.470281122	0	150	P4-2	1
CA899	12	3.903089987	0	150	P4-2	2
CA899	14	5.580535543	0	150	P4-2	1
CA899	14	1	1	150	P4-2	2
CA899	17	4.261279195	0	150	P4-2	1
CA899	17	1	1	150	P4-2	2
CA899	19	3.476856502	0	150	P4-2	1
CA899	19	1	1	150	P4-2	2
CA899	21	2.710261597	0	150	P4-2	1
CA899	21	1	1	150	P4-2	2
CAK013	3	3.103669385	0	180	P4-3	1
CAK013	3	1	1	180	P4-3	2
CAK013	5	4.99562118	0	180	P4-3	1
CAK013	5	2.99	0	180	P4-3	2
CAK013	7	7.048279305	0	180	P4-3	1
CAK013	7	5.3	0	180	P4-3	2
CAK013	10	5.667665833	0	180	P4-3	1
CAK013	10	5.36	0	180	P4-3	2
CAK013	11	5.937944661	0	180	P4-3	1
CAK013	11	5.43	0	180	P4-3	2
CB819	5	8.51	0	0	P4-1	1
CB819	5	6.41	0	0	P4-1	2
CB819	7	8.92	0	0	P4-1	1
CB819	7	6.82	0	0	P4-1	2
CB819	8	8.17	0	0	P4-1	1
CB819	8	6.54	0	0	P4-1	2
CB881	5	5.04	0	100	P4-1	1
CB881	5	1	1	100	P4-1	2
CB881	7	6.86	0	100	P4-1	1
CB881	7	3.9	0	100	P4-1	2
CB881	10	7.09	0	100	P4-1	1
CB881	10	4.37	0	100	P4-1	2
CB979	5	6.46	0	0	P4-1	1
CB979	5	3.97	0	0	P4-1	2
CB979	7	7.22	0	0	P4-1	1
CB979	7	5.45	0	0	P4-1	2
CB979	9	6.46	0	0	P4-1	1
CB979	9	3.95	0	0	P4-1	2
CBD021	3	1	1	180	P4-3	1
CBD021	3	1	1	180	P4-3	2
CBD021	5	4.915268015	0	180	P4-3	1
CBD021	5	1.52	0	180	P4-3	2
CBD021	7	4.462368357	0	180	P4-3	1
CBD021	7	2	0	180	P4-3	2
CBD021	10	3.713622956	0	180	P4-3	1
CBD021	10	3.62	0	180	P4-3	2
CBD021	12	3.64422704	0	180	P4-3	1
CBD021	12	1	1	180	P4-3	2
CBD021	14	2.205174903	0	180	P4-3	1
CBD021	14	1	1	180	P4-3	2
CBD021	17	1.197107923	0	180	P4-3	1
CBD021	17	1	1	180	P4-3	2
CBD021	19	1	1	180	P4-3	1
CBD021	19	1	1	180	P4-3	2
CBD021	21	1	1	180	P4-3	1
CBD021	21	1	1	180	P4-3	2
CBK018	3	2.93845729	0	150	P4-2	1
CBK018	3	1	1	150	P4-2	2
CBK018	5	4.12935356	0	150	P4-2	1
CBK018	5	1	1	150	P4-2	2
CBK018	7	5.94065687	0	150	P4-2	1
CBK018	7	2.823908741	0	150	P4-2	2
CBK018	10	7.862492468	0	150	P4-2	1
CBK018	10	4.263241435	0	150	P4-2	2
CBK018	12	7.712739045	0	150	P4-2	1
CBK018	12	1	1	150	P4-2	2
CCB120	3	2.278223235	0	0	P4-3	1
CCB120	3	1.05	0	0	P4-3	2
CCB120	5	6.693994895	0	0	P4-3	1
CCB120	5	4.9	0	0	P4-3	2
CCB120	7	7.855463372	0	0	P4-3	1
CCB120	7	6.39	0	0	P4-3	2
CCB125	3	2.246739097	0	0	P4-2	1
CCB125	3	1	1	0	P4-2	2
CCB125	5	9.003470931	0	0	P4-2	1
CCB125	5	5.823908741	0	0	P4-2	2
CCB125	7	8.910766431	0	0	P4-2	1
CCB125	7	6.67669361	0	0	P4-2	2
CCB125	9	8.736054104	0	0	P4-2	1
CCB125	9	7.431363764	0	0	P4-2	2
CCC003	3	3.583823233	0	150	P4-2	1
CCC003	3	1	1	150	P4-2	2
CCC003	5	3.904723425	0	150	P4-2	1
CCC003	5	1	1	150	P4-2	2
CCC003	7	3.466159829	0	150	P4-2	1
CCC003	7	1	1	150	P4-2	2
CCC003	10	3.334234194	0	150	P4-2	1
CCC003	10	1	1	150	P4-2	2
CCC003	12	4.642793869	0	150	P4-2	1
CCC003	12	1	1	150	P4-2	2
CCC003	14	4.546523811	0	150	P4-2	1
CCC003	14	1	1	150	P4-2	2
CCC003	17	2.567639289	0	150	P4-2	1
CCC003	17	1	1	150	P4-2	2
CCC003	19	3.66583106	0	150	P4-2	1
CCC003	19	1	1	150	P4-2	2
CCC003	21	3.444766483	0	150	P4-2	1
CCC003	21	1	1	150	P4-2	2
CCC017	3	3.095341828	0	0	P4-2	1
CCC017	3	1	1	0	P4-2	2
CCC017	5	8.137040411	0	0	P4-2	1
CCC017	5	5.238882089	0	0	P4-2	2
CCC017	7	8.971380912	0	0	P4-2	1
CCC017	7	6.653212514	0	0	P4-2	2
CCC017	9	8.297490507	0	0	P4-2	1
CCC017	9	7.30820858	0	0	P4-2	2
CCC023	3	5.726723408	0	0	P4-2	1
CCC023	3	1	1	0	P4-2	2
CCC023	5	8.661177392	0	0	P4-2	1
CCC023	5	6.794720352	0	0	P4-2	2
CCC023	7	8.304621623	0	0	P4-2	1
CCC023	7	7.397940009	0	0	P4-2	2
CCC023	8	8.94285645	0	0	P4-2	1
CCC023	8	6.851937465	0	0	P4-2	2
CCC026	3	3.501815406	0	150	P4-2	1
CCC026	3	1	1	150	P4-2	2
CCC026	5	7.017455294	0	150	P4-2	1
CCC026	5	3.609238576	0	150	P4-2	2
CCC026	7	7.505936699	0	150	P4-2	1
CCC026	7	4.267171728	0	150	P4-2	2
CCC026	10	5.448609908	0	150	P4-2	1
CCC026	10	3.054357662	0	150	P4-2	2
CCC027	3	1	1	180	P4-3	1
CCC027	3	1	1	180	P4-3	2
CCC027	5	1	1	180	P4-3	1
CCC027	5	.	0	180	P4-3	2
CCC027	7	4.053297699	0	180	P4-3	1
CCC027	7	.	0	180	P4-3	2
CCC027	10	5.079626761	0	180	P4-3	1
CCC027	10	3.17	0	180	P4-3	2
CCC027	12	5.14537026	0	180	P4-3	1
CCC027	12	1	1	180	P4-3	2
CCC027	14	4.484282857	0	180	P4-3	1
CCC027	14	1	1	180	P4-3	2
CCC027	17	1	1	180	P4-3	1
CCC027	17	1	1	180	P4-3	2
CCC027	19	1	1	180	P4-3	1
CCC027	19	1	1	180	P4-3	2
CCC027	21	1	1	180	P4-3	1
CCC027	21	1	1	180	P4-3	2
CCC034	3	2.549811501	0	0	P4-2	1
CCC034	3	1	1	0	P4-2	2
CCC034	5	6.243729274	0	0	P4-2	1
CCC034	5	3.592300154	0	0	P4-2	2
CCC034	7	9.099740989	0	0	P4-2	1
CCC034	7	6.40654018	0	0	P4-2	2
CCC034	10	7.698476814	0	0	P4-2	1
CCC034	10	5.06694679	0	0	P4-2	2
CCC073	3	3.737142214	0	150	P4-2	1
CCC073	3	1	1	150	P4-2	2
CCC073	5	6.76073514	0	150	P4-2	1
CCC073	5	3.392110465	0	150	P4-2	2
CCC073	7	6.824915179	0	150	P4-2	1
CCC073	7	3.505149978	0	150	P4-2	2
CCC073	10	7.830402449	0	150	P4-2	1
CCC073	10	4.541995036	0	150	P4-2	2
CCC073	11	7.477412237	0	150	P4-2	1
CCC073	11	5.156347201	0	150	P4-2	2
CCC076	3	5.780206774	0	0	P4-2	1
CCC076	3	3.480326395	0	0	P4-2	2
CCC076	5	7.61290343	0	0	P4-2	1
CCC076	5	4.672097858	0	0	P4-2	2
CCC076	7	7.206429852	0	0	P4-2	1
CCC076	7	5.477121255	0	0	P4-2	2
CCC076	9	6.446966063	0	0	P4-2	1
CCC076	9	4.696065014	0	0	P4-2	2
CCD007	3	1	1	180	P4-3	1
CCD007	3	1	1	180	P4-3	2
CCD007	5	3.556569042	0	180	P4-3	1
CCD007	5	1	1	180	P4-3	2
CCD007	7	4.378362776	0	180	P4-3	1
CCD007	7	2	0	180	P4-3	2
CCD007	10	5.324338673	0	180	P4-3	1
CCD007	10	3.73	0	180	P4-3	2
CCD007	12	5.050407429	0	180	P4-3	1
CCD007	12	1	1	180	P4-3	2
CCD007	14	5.00657843	0	180	P4-3	1
CCD007	14	1	1	180	P4-3	2
CCD007	17	4.400277275	0	180	P4-3	1
CCD007	17	1	1	180	P4-3	2
CCD007	19	4.005816283	0	180	P4-3	1
CCD007	19	1	1	180	P4-3	2
CCD007	21	3.450648961	0	180	P4-3	1
CCD007	21	1	1	180	P4-3	2
CCD029	3	1	1	180	P4-3	1
CCD029	3	1	1	180	P4-3	2
CCD029	5	2.599635895	0	180	P4-3	1
CCD029	5	1	1	180	P4-3	2
CCD029	7	3.472563461	0	180	P4-3	1
CCD029	7	1	1	180	P4-3	2
CCD029	10	7.274729134	0	180	P4-3	1
CCD029	10	5.37	0	180	P4-3	2
CCD029	12	7.088455887	0	180	P4-3	1
CCD029	12	5.28	0	180	P4-3	2
CCD029	14	6.493111983	0	180	P4-3	1
CCD029	14	4.55	0	180	P4-3	2
CCD029	17	6.770695644	0	180	P4-3	1
CCD029	17	1	1	180	P4-3	2
CCE006	3	1	1	0	P4-3	1
CCE006	3	1	1	0	P4-3	2
CCE006	5	6.566160315	0	0	P4-3	1
CCE006	5	5.31	0	0	P4-3	2
CCE006	7	7.855463372	0	0	P4-3	1
CCE006	7	6.75	0	0	P4-3	2
CCE006	8	6.883920558	0	0	P4-3	1
CCE006	8	6.28	0	0	P4-3	2
CCI036	3	1	1	0	P4-3	1
CCI036	3	1	1	0	P4-3	2
CCI036	5	7.508483796	0	0	P4-3	1
CCI036	5	6.11	0	0	P4-3	2
CCI036	7	8.889097268	0	0	P4-3	1
CCI036	7	7.05	0	0	P4-3	2
CCI036	8	8.198790532	0	0	P4-3	1
CCI036	8	6.97	0	0	P4-3	2
CCJ046	3	1.145974091	0	0	P4-3	1
CCJ046	3	1	1	0	P4-3	2
CCJ046	5	5.225723425	0	0	P4-3	1
CCJ046	5	3.47	0	0	P4-3	2
CCJ046	7	6.409106401	0	0	P4-3	1
CCJ046	7	5.6	0	0	P4-3	2
CCJ046	10	5.868548745	0	0	P4-3	1
CCJ046	10	4.41	0	0	P4-3	2
CCL053	3	1	1	0	P4-3	1
CCL053	3	1	1	0	P4-3	2
CCL053	5	6.347015319	0	0	P4-3	1
CCL053	5	4.58	0	0	P4-3	2
CCL053	7	5.919682578	0	0	P4-3	1
CCL053	7	5.56	0	0	P4-3	2
CCL053	9	4.831262433	0	0	P4-3	1
CCL053	9	4.77	0	0	P4-3	2
