# Supplementary material for: Antiviral efficacy of favipiravir against Ebola virus: A translational study in cynomolgus macaques
Source: PLoS Med. 2018 Mar 27;15(3):e1002535. doi: 10.1371/journal.pmed.1002535 (PMC5870946; doi:10.1371/journal.pmed.1002535)
Supplement: S7 Table — (XLSX) [file pmed.1002535.s012.xlsx]

## Sheet: S7_Table
id	TIME	AMT	Y	RATE	CENS	GROUP	STUDY	PEAK
CA470	-48	200	.	600	.	100	P4-1	.
CA470	-47.75	.	1105	.	0	100	P4-1	1
CA470	-36	200	.	600	.	100	P4-1	.
CA470	-24.08333333	.	3.2	.	0	100	P4-1	0
CA470	-24	100	.	600	.	100	P4-1	.
CA470	-12	100	.	600	.	100	P4-1	.
CA470	0	100	.	600	.	100	P4-1	.
CA470	12	100	.	600	.	100	P4-1	.
CA470	24	100	.	600	.	100	P4-1	.
CA470	36	100	.	600	.	100	P4-1	.
CA470	48	100	.	600	.	100	P4-1	.
CA470	60	100	.	600	.	100	P4-1	.
CA470	72	100	.	600	.	100	P4-1	.
CA470	84	100	.	600	.	100	P4-1	.
CA470	96	100	.	600	.	100	P4-1	.
CA470	108	100	.	600	.	100	P4-1	.
CA470	119.9166667	.	6	.	0	100	P4-1	0
CA470	120	100	.	600	.	100	P4-1	.
CA470	132	100	.	600	.	100	P4-1	.
CA470	144	100	.	600	.	100	P4-1	.
CA470	156	100	.	600	.	100	P4-1	.
CA470	167.9166667	.	5	.	0	100	P4-1	0
CA470	168	100	.	600	.	100	P4-1	.
CA470	180	100	.	600	.	100	P4-1	.
CA470	192	100	.	600	.	100	P4-1	.
CA470	204	100	.	600	.	100	P4-1	.
CA470	215.9166667	.	.	.	0	100	P4-1	0
CA470	216	100	.	600	.	100	P4-1	.
CA550	-48.08333333	.	1	.	1	100	P4-1	0
CA550	-48	200	.	600	.	100	P4-1	.
CA550	-36	200	.	600	.	100	P4-1	.
CA550	-24.08333333	.	1	.	1	100	P4-1	0
CA550	-24	100	.	600	.	100	P4-1	.
CA550	-12	100	.	600	.	100	P4-1	.
CA550	0	100	.	600	.	100	P4-1	.
CA550	12	100	.	600	.	100	P4-1	.
CA550	24	100	.	600	.	100	P4-1	.
CA550	36	100	.	600	.	100	P4-1	.
CA550	48	100	.	600	.	100	P4-1	.
CA550	60	100	.	600	.	100	P4-1	.
CA550	72	100	.	600	.	100	P4-1	.
CA550	84	100	.	600	.	100	P4-1	.
CA550	96	100	.	600	.	100	P4-1	.
CA550	108	100	.	600	.	100	P4-1	.
CA550	119.9166667	.	1	.	1	100	P4-1	0
CA550	120	100	.	600	.	100	P4-1	.
CA550	132	100	.	600	.	100	P4-1	.
CA550	144	100	.	600	.	100	P4-1	.
CA550	156	100	.	600	.	100	P4-1	.
CA550	167.9166667	.	1	.	1	100	P4-1	0
CA550	168	100	.	600	.	100	P4-1	.
CA550	180	100	.	600	.	100	P4-1	.
CA550	191.9166667	.	1.8	.	0	100	P4-1	0
CA550	192	100	.	600	.	100	P4-1	.
CA899	-48.08333333	.	1	.	1	150	P4-2	0
CA899	-48	250	.	900	.	150	P4-2	.
CA899	-36	250	.	900	.	150	P4-2	.
CA899	-24	150	.	900	.	150	P4-2	.
CA899	-12	150	.	900	.	150	P4-2	.
CA899	-0.083333333	.	31	.	0	150	P4-2	0
CA899	0	150	.	900	.	150	P4-2	.
CA899	12	150	.	900	.	150	P4-2	.
CA899	24	150	.	900	.	150	P4-2	.
CA899	36	150	.	900	.	150	P4-2	.
CA899	48	150	.	900	.	150	P4-2	.
CA899	60	150	.	900	.	150	P4-2	.
CA899	71.91666667	.	50	.	0	150	P4-2	0
CA899	72	150	.	900	.	150	P4-2	.
CA899	84	150	.	900	.	150	P4-2	.
CA899	96	150	.	900	.	150	P4-2	.
CA899	108	150	.	900	.	150	P4-2	.
CA899	119.9166667	.	34	.	0	150	P4-2	0
CA899	120	150	.	900	.	150	P4-2	.
CA899	132	150	.	900	.	150	P4-2	.
CA899	144	150	.	900	.	150	P4-2	.
CA899	156	150	.	900	.	150	P4-2	.
CA899	167.9166667	.	28	.	0	150	P4-2	0
CA899	168	150	.	900	.	150	P4-2	.
CA899	180	150	.	900	.	150	P4-2	.
CA899	192	150	.	900	.	150	P4-2	.
CA899	204	150	.	900	.	150	P4-2	.
CA899	216	150	.	900	.	150	P4-2	.
CA899	228	150	.	900	.	150	P4-2	.
CA899	239.9166667	.	6	.	0	150	P4-2	0
CA899	240	150	.	900	.	150	P4-2	.
CA899	252	150	.	900	.	150	P4-2	.
CA899	264	150	.	900	.	150	P4-2	.
CA899	276	150	.	900	.	150	P4-2	.
CA899	287.9166667	.	1	.	1	150	P4-2	0
CA899	288	150	.	900	.	150	P4-2	.
CA899	335.9166667	.	1	.	1	150	P4-2	0
CA899	407.9166667	.	1	.	1	150	P4-2	0
CA899	455.9166667	.	1	.	1	150	P4-2	0
CA899	479.9166667	.	1	.	1	150	P4-2	0
CAK013	-48.08333333	.	1	.	1	180	P4-3	0
CAK013	-48	250	.	1080	.	180	P4-3	.
CAK013	-36	250	.	1080	.	180	P4-3	.
CAK013	-24	180	.	1080	.	180	P4-3	.
CAK013	-12	180	.	1080	.	180	P4-3	.
CAK013	-0.083333333	.	164.1666667	.	0	180	P4-3	0
CAK013	0	180	.	1080	.	180	P4-3	.
CAK013	12	180	.	1080	.	180	P4-3	.
CAK013	24	180	.	1080	.	180	P4-3	.
CAK013	36	180	.	1080	.	180	P4-3	.
CAK013	48	180	.	1080	.	180	P4-3	.
CAK013	60	180	.	1080	.	180	P4-3	.
CAK013	71.91666667	.	212.5	.	0	180	P4-3	0
CAK013	72	180	.	1080	.	180	P4-3	.
CAK013	84	180	.	1080	.	180	P4-3	.
CAK013	96	180	.	1080	.	180	P4-3	.
CAK013	108	180	.	1080	.	180	P4-3	.
CAK013	119.9166667	.	105	.	0	180	P4-3	0
CAK013	120	180	.	1080	.	180	P4-3	.
CAK013	132	180	.	1080	.	180	P4-3	.
CAK013	144	180	.	1080	.	180	P4-3	.
CAK013	156	180	.	1080	.	180	P4-3	.
CAK013	167.9166667	.	110.8333333	.	0	180	P4-3	0
CAK013	168	180	.	1080	.	180	P4-3	.
CAK013	180	180	.	1080	.	180	P4-3	.
CAK013	192	180	.	1080	.	180	P4-3	.
CAK013	204	180	.	1080	.	180	P4-3	.
CAK013	216	180	.	1080	.	180	P4-3	.
CAK013	228	180	.	1080	.	180	P4-3	.
CAK013	239.9166667	.	204.1666667	.	0	180	P4-3	0
CAK013	240	180	.	1080	.	180	P4-3	.
CAK013	252	180	.	1080	.	180	P4-3	.
CAK013	263.9166667	.	204.1666667	.	0	180	P4-3	0
CAK013	264	180	.	1080	.	180	P4-3	.
CB881	-48.08333333	.	5	.	0	100	P4-1	0
CB881	-48	200	.	600	.	100	P4-1	.
CB881	-36	200	.	600	.	100	P4-1	.
CB881	-24.08333333	.	57	.	0	100	P4-1	0
CB881	-24	100	.	600	.	100	P4-1	.
CB881	-12	100	.	600	.	100	P4-1	.
CB881	0	100	.	600	.	100	P4-1	.
CB881	12	100	.	600	.	100	P4-1	.
CB881	24	100	.	600	.	100	P4-1	.
CB881	36	100	.	600	.	100	P4-1	.
CB881	48	100	.	600	.	100	P4-1	.
CB881	60	100	.	600	.	100	P4-1	.
CB881	72	100	.	600	.	100	P4-1	.
CB881	84	100	.	600	.	100	P4-1	.
CB881	96	100	.	600	.	100	P4-1	.
CB881	108	100	.	600	.	100	P4-1	.
CB881	119.9166667	.	51.8	.	0	100	P4-1	0
CB881	120	100	.	600	.	100	P4-1	.
CB881	132	100	.	600	.	100	P4-1	.
CB881	144	100	.	600	.	100	P4-1	.
CB881	156	100	.	600	.	100	P4-1	.
CB881	167.9166667	.	37.9	.	0	100	P4-1	0
CB881	168	100	.	600	.	100	P4-1	.
CB881	180	100	.	600	.	100	P4-1	.
CB881	192	100	.	600	.	100	P4-1	.
CB881	204	100	.	600	.	100	P4-1	.
CB881	216	100	.	600	.	100	P4-1	.
CB881	228	100	.	600	.	100	P4-1	.
CB881	239.9166667	.	9.2	.	0	100	P4-1	0
CB881	240	100	.	600	.	100	P4-1	.
CBD021	-48.08333333	.	1	.	1	180	P4-3	0
CBD021	-48	250	.	1080	.	180	P4-3	.
CBD021	-36	250	.	1080	.	180	P4-3	.
CBD021	-24	180	.	1080	.	180	P4-3	.
CBD021	-12	180	.	1080	.	180	P4-3	.
CBD021	-0.083333333	.	325.8333333	.	0	180	P4-3	0
CBD021	0	180	.	1080	.	180	P4-3	.
CBD021	12	180	.	1080	.	180	P4-3	.
CBD021	24	180	.	1080	.	180	P4-3	.
CBD021	36	180	.	1080	.	180	P4-3	.
CBD021	48	180	.	1080	.	180	P4-3	.
CBD021	60	180	.	1080	.	180	P4-3	.
CBD021	71.91666667	.	136.6666667	.	0	180	P4-3	0
CBD021	72	180	.	1080	.	180	P4-3	.
CBD021	84	180	.	1080	.	180	P4-3	.
CBD021	96	180	.	1080	.	180	P4-3	.
CBD021	108	180	.	1080	.	180	P4-3	.
CBD021	119.9166667	.	115	.	0	180	P4-3	0
CBD021	120	180	.	1080	.	180	P4-3	.
CBD021	132	180	.	1080	.	180	P4-3	.
CBD021	144	180	.	1080	.	180	P4-3	.
CBD021	156	180	.	1080	.	180	P4-3	.
CBD021	167.9166667	.	49.16666667	.	0	180	P4-3	0
CBD021	168	180	.	1080	.	180	P4-3	.
CBD021	180	180	.	1080	.	180	P4-3	.
CBD021	192	180	.	1080	.	180	P4-3	.
CBD021	204	180	.	1080	.	180	P4-3	.
CBD021	216	180	.	1080	.	180	P4-3	.
CBD021	228	180	.	1080	.	180	P4-3	.
CBD021	239.9166667	.	36.75	.	0	180	P4-3	0
CBD021	240	180	.	1080	.	180	P4-3	.
CBD021	252	180	.	1080	.	180	P4-3	.
CBD021	264	180	.	1080	.	180	P4-3	.
CBD021	276	180	.	1080	.	180	P4-3	.
CBD021	287.9166667	.	20.5	.	0	180	P4-3	0
CBD021	288	180	.	1080	.	180	P4-3	.
CBD021	335.9166667	.	1	.	1	180	P4-3	0
CBD021	407.9166667	.	1	.	1	180	P4-3	0
CBD021	455.9166667	.	1	.	1	180	P4-3	0
CBD021	503.9166667	.	1	.	1	180	P4-3	0
CBK018	-48.08333333	.	1	.	1	150	P4-2	0
CBK018	-48	250	.	900	.	150	P4-2	.
CBK018	-36	250	.	900	.	150	P4-2	.
CBK018	-24	150	.	900	.	150	P4-2	.
CBK018	-12	150	.	900	.	150	P4-2	.
CBK018	-0.083333333	.	10.5	.	0	150	P4-2	0
CBK018	0	150	.	900	.	150	P4-2	.
CBK018	12	150	.	900	.	150	P4-2	.
CBK018	24	150	.	900	.	150	P4-2	.
CBK018	36	150	.	900	.	150	P4-2	.
CBK018	48	150	.	900	.	150	P4-2	.
CBK018	60	150	.	900	.	150	P4-2	.
CBK018	71.91666667	.	27.5	.	0	150	P4-2	0
CBK018	72	150	.	900	.	150	P4-2	.
CBK018	84	150	.	900	.	150	P4-2	.
CBK018	96	150	.	900	.	150	P4-2	.
CBK018	108	150	.	900	.	150	P4-2	.
CBK018	119.9166667	.	11	.	0	150	P4-2	0
CBK018	120	150	.	900	.	150	P4-2	.
CBK018	132	150	.	900	.	150	P4-2	.
CBK018	144	150	.	900	.	150	P4-2	.
CBK018	156	150	.	900	.	150	P4-2	.
CBK018	167.9166667	.	17	.	0	150	P4-2	0
CBK018	168	150	.	900	.	150	P4-2	.
CBK018	180	150	.	900	.	150	P4-2	.
CBK018	192	150	.	900	.	150	P4-2	.
CBK018	204	150	.	900	.	150	P4-2	.
CBK018	216	150	.	900	.	150	P4-2	.
CBK018	228	150	.	900	.	150	P4-2	.
CBK018	239.9166667	.	10	.	0	150	P4-2	0
CBK018	240	150	.	900	.	150	P4-2	.
CBK018	252	150	.	900	.	150	P4-2	.
CBK018	264	150	.	900	.	150	P4-2	.
CBK018	276	150	.	900	.	150	P4-2	.
CBK018	287.9166667	.	5.2	.	0	150	P4-2	0
CBK018	288	150	.	900	.	150	P4-2	.
CCC003	-48.08333333	.	1	.	1	150	P4-2	0
CCC003	-48	250	.	900	.	150	P4-2	.
CCC003	-36	250	.	900	.	150	P4-2	.
CCC003	-24	150	.	900	.	150	P4-2	.
CCC003	-12	150	.	900	.	150	P4-2	.
CCC003	-0.083333333	.	35	.	0	150	P4-2	0
CCC003	0	150	.	900	.	150	P4-2	.
CCC003	12	150	.	900	.	150	P4-2	.
CCC003	24	150	.	900	.	150	P4-2	.
CCC003	36	150	.	900	.	150	P4-2	.
CCC003	48	150	.	900	.	150	P4-2	.
CCC003	60	150	.	900	.	150	P4-2	.
CCC003	71.91666667	.	52.5	.	0	150	P4-2	0
CCC003	72	150	.	900	.	150	P4-2	.
CCC003	84	150	.	900	.	150	P4-2	.
CCC003	96	150	.	900	.	150	P4-2	.
CCC003	108	150	.	900	.	150	P4-2	.
CCC003	119.9166667	.	14	.	0	150	P4-2	0
CCC003	120	150	.	900	.	150	P4-2	.
CCC003	132	150	.	900	.	150	P4-2	.
CCC003	144	150	.	900	.	150	P4-2	.
CCC003	156	150	.	900	.	150	P4-2	.
CCC003	167.9166667	.	3.4	.	0	150	P4-2	0
CCC003	168	150	.	900	.	150	P4-2	.
CCC003	180	150	.	900	.	150	P4-2	.
CCC003	192	150	.	900	.	150	P4-2	.
CCC003	204	150	.	900	.	150	P4-2	.
CCC003	216	150	.	900	.	150	P4-2	.
CCC003	228	150	.	900	.	150	P4-2	.
CCC003	239.9166667	.	4	.	0	150	P4-2	0
CCC003	240	150	.	900	.	150	P4-2	.
CCC003	252	150	.	900	.	150	P4-2	.
CCC003	264	150	.	900	.	150	P4-2	.
CCC003	276	150	.	900	.	150	P4-2	.
CCC003	287.9166667	.	1	.	1	150	P4-2	0
CCC003	288	150	.	900	.	150	P4-2	.
CCC003	335.9166667	.	1	.	1	150	P4-2	0
CCC003	407.9166667	.	1	.	1	150	P4-2	0
CCC003	455.9166667	.	1	.	1	150	P4-2	0
CCC003	479.9166667	.	1	.	1	150	P4-2	0
CCC026	-48.08333333	.	1	.	1	150	P4-2	0
CCC026	-48	250	.	900	.	150	P4-2	.
CCC026	-36	250	.	900	.	150	P4-2	.
CCC026	-24	150	.	900	.	150	P4-2	.
CCC026	-12	150	.	900	.	150	P4-2	.
CCC026	-0.083333333	.	6.6	.	0	150	P4-2	0
CCC026	0	150	.	900	.	150	P4-2	.
CCC026	12	150	.	900	.	150	P4-2	.
CCC026	24	150	.	900	.	150	P4-2	.
CCC026	36	150	.	900	.	150	P4-2	.
CCC026	48	150	.	900	.	150	P4-2	.
CCC026	60	150	.	900	.	150	P4-2	.
CCC026	71.91666667	.	18	.	0	150	P4-2	0
CCC026	72	150	.	900	.	150	P4-2	.
CCC026	84	150	.	900	.	150	P4-2	.
CCC026	96	150	.	900	.	150	P4-2	.
CCC026	108	150	.	900	.	150	P4-2	.
CCC026	119.9166667	.	7	.	0	150	P4-2	0
CCC026	120	150	.	900	.	150	P4-2	.
CCC026	132	150	.	900	.	150	P4-2	.
CCC026	144	150	.	900	.	150	P4-2	.
CCC026	156	150	.	900	.	150	P4-2	.
CCC026	167.9166667	.	8.5	.	0	150	P4-2	0
CCC026	168	150	.	900	.	150	P4-2	.
CCC026	180	150	.	900	.	150	P4-2	.
CCC026	192	150	.	900	.	150	P4-2	.
CCC026	204	150	.	900	.	150	P4-2	.
CCC026	216	150	.	900	.	150	P4-2	.
CCC026	228	150	.	900	.	150	P4-2	.
CCC026	239.9166667	.	2.8	.	0	150	P4-2	0
CCC026	240	150	.	900	.	150	P4-2	.
CCC027	-48.08333333	.	1	.	1	180	P4-3	0
CCC027	-48	250	.	1080	.	180	P4-3	.
CCC027	-36	250	.	1080	.	180	P4-3	.
CCC027	-24	180	.	1080	.	180	P4-3	.
CCC027	-12	180	.	1080	.	180	P4-3	.
CCC027	-0.083333333	.	279.1666667	.	0	180	P4-3	0
CCC027	0	180	.	1080	.	180	P4-3	.
CCC027	12	180	.	1080	.	180	P4-3	.
CCC027	24	180	.	1080	.	180	P4-3	.
CCC027	36	180	.	1080	.	180	P4-3	.
CCC027	48	180	.	1080	.	180	P4-3	.
CCC027	60	180	.	1080	.	180	P4-3	.
CCC027	71.91666667	.	371.6666667	.	0	180	P4-3	0
CCC027	72	180	.	1080	.	180	P4-3	.
CCC027	84	180	.	1080	.	180	P4-3	.
CCC027	96	180	.	1080	.	180	P4-3	.
CCC027	108	180	.	1080	.	180	P4-3	.
CCC027	119.9166667	.	300	.	0	180	P4-3	0
CCC027	120	180	.	1080	.	180	P4-3	.
CCC027	132	180	.	1080	.	180	P4-3	.
CCC027	144	180	.	1080	.	180	P4-3	.
CCC027	156	180	.	1080	.	180	P4-3	.
CCC027	167.9166667	.	245.6666667	.	0	180	P4-3	0
CCC027	168	180	.	1080	.	180	P4-3	.
CCC027	180	180	.	1080	.	180	P4-3	.
CCC027	192	180	.	1080	.	180	P4-3	.
CCC027	204	180	.	1080	.	180	P4-3	.
CCC027	216	180	.	1080	.	180	P4-3	.
CCC027	228	180	.	1080	.	180	P4-3	.
CCC027	239.9166667	.	104.1666667	.	0	180	P4-3	0
CCC027	240	180	.	1080	.	180	P4-3	.
CCC027	252	180	.	1080	.	180	P4-3	.
CCC027	264	180	.	1080	.	180	P4-3	.
CCC027	276	180	.	1080	.	180	P4-3	.
CCC027	287.9166667	.	46	.	0	180	P4-3	0
CCC027	288	180	.	1080	.	180	P4-3	.
CCC027	335.9166667	.	1	.	1	180	P4-3	0
CCC027	407.9166667	.	1	.	1	180	P4-3	0
CCC027	455.9166667	.	1	.	1	180	P4-3	0
CCC027	503.9166667	.	1	.	1	180	P4-3	0
CCC073	-48.08333333	.	1	.	1	150	P4-2	0
CCC073	-48	250	.	900	.	150	P4-2	.
CCC073	-36	250	.	900	.	150	P4-2	.
CCC073	-24	150	.	900	.	150	P4-2	.
CCC073	-12	150	.	900	.	150	P4-2	.
CCC073	-0.083333333	.	38.3	.	0	150	P4-2	0
CCC073	0	150	.	900	.	150	P4-2	.
CCC073	12	150	.	900	.	150	P4-2	.
CCC073	24	150	.	900	.	150	P4-2	.
CCC073	36	150	.	900	.	150	P4-2	.
CCC073	48	150	.	900	.	150	P4-2	.
CCC073	60	150	.	900	.	150	P4-2	.
CCC073	71.91666667	.	83	.	0	150	P4-2	0
CCC073	72	150	.	900	.	150	P4-2	.
CCC073	84	150	.	900	.	150	P4-2	.
CCC073	96	150	.	900	.	150	P4-2	.
CCC073	108	150	.	900	.	150	P4-2	.
CCC073	119.9166667	.	18	.	0	150	P4-2	0
CCC073	120	150	.	900	.	150	P4-2	.
CCC073	132	150	.	900	.	150	P4-2	.
CCC073	144	150	.	900	.	150	P4-2	.
CCC073	156	150	.	900	.	150	P4-2	.
CCC073	167.9166667	.	20	.	0	150	P4-2	0
CCC073	168	150	.	900	.	150	P4-2	.
CCC073	180	150	.	900	.	150	P4-2	.
CCC073	192	150	.	900	.	150	P4-2	.
CCC073	204	150	.	900	.	150	P4-2	.
CCC073	216	150	.	900	.	150	P4-2	.
CCC073	228	150	.	900	.	150	P4-2	.
CCC073	239.9166667	.	2.8	.	0	150	P4-2	0
CCC073	240	150	.	900	.	150	P4-2	.
CCC073	252	150	.	900	.	150	P4-2	.
CCC073	263.9166667	.	15.3	.	0	150	P4-2	0
CCC073	264	150	.	900	.	150	P4-2	.
CCD007	-48.08333333	.	1	.	1	180	P4-3	0
CCD007	-48	250	.	1080	.	180	P4-3	.
CCD007	-36	250	.	1080	.	180	P4-3	.
CCD007	-24	180	.	1080	.	180	P4-3	.
CCD007	-12	180	.	1080	.	180	P4-3	.
CCD007	-0.083333333	.	212.5	.	0	180	P4-3	0
CCD007	0	180	.	1080	.	180	P4-3	.
CCD007	12	180	.	1080	.	180	P4-3	.
CCD007	24	180	.	1080	.	180	P4-3	.
CCD007	36	180	.	1080	.	180	P4-3	.
CCD007	48	180	.	1080	.	180	P4-3	.
CCD007	60	180	.	1080	.	180	P4-3	.
CCD007	71.91666667	.	247.5	.	0	180	P4-3	0
CCD007	72	180	.	1080	.	180	P4-3	.
CCD007	84	180	.	1080	.	180	P4-3	.
CCD007	96	180	.	1080	.	180	P4-3	.
CCD007	108	180	.	1080	.	180	P4-3	.
CCD007	119.9166667	.	98.33333333	.	0	180	P4-3	0
CCD007	120	180	.	1080	.	180	P4-3	.
CCD007	132	180	.	1080	.	180	P4-3	.
CCD007	144	180	.	1080	.	180	P4-3	.
CCD007	156	180	.	1080	.	180	P4-3	.
CCD007	167.9166667	.	122.5	.	0	180	P4-3	0
CCD007	168	180	.	1080	.	180	P4-3	.
CCD007	180	180	.	1080	.	180	P4-3	.
CCD007	192	180	.	1080	.	180	P4-3	.
CCD007	204	180	.	1080	.	180	P4-3	.
CCD007	216	180	.	1080	.	180	P4-3	.
CCD007	228	180	.	1080	.	180	P4-3	.
CCD007	239.9166667	.	32.5	.	0	180	P4-3	0
CCD007	240	180	.	1080	.	180	P4-3	.
CCD007	252	180	.	1080	.	180	P4-3	.
CCD007	264	180	.	1080	.	180	P4-3	.
CCD007	276	180	.	1080	.	180	P4-3	.
CCD007	287.9166667	.	29.66666667	.	0	180	P4-3	0
CCD007	288	180	.	1080	.	180	P4-3	.
CCD007	335.9166667	.	1	.	1	180	P4-3	0
CCD007	407.9166667	.	1	.	1	180	P4-3	0
CCD007	455.9166667	.	1	.	1	180	P4-3	0
CCD007	503.9166667	.	1	.	1	180	P4-3	0
CCD029	-48.08333333	.	1	.	1	180	P4-3	0
CCD029	-48	250	.	1080	.	180	P4-3	.
CCD029	-36	250	.	1080	.	180	P4-3	.
CCD029	-24	180	.	1080	.	180	P4-3	.
CCD029	-12	180	.	1080	.	180	P4-3	.
CCD029	-0.083333333	.	315.8333333	.	0	180	P4-3	0
CCD029	0	180	.	1080	.	180	P4-3	.
CCD029	12	180	.	1080	.	180	P4-3	.
CCD029	24	180	.	1080	.	180	P4-3	.
CCD029	36	180	.	1080	.	180	P4-3	.
CCD029	48	180	.	1080	.	180	P4-3	.
CCD029	60	180	.	1080	.	180	P4-3	.
CCD029	71.91666667	.	474.1666667	.	0	180	P4-3	0
CCD029	72	180	.	1080	.	180	P4-3	.
CCD029	84	180	.	1080	.	180	P4-3	.
CCD029	96	180	.	1080	.	180	P4-3	.
CCD029	108	180	.	1080	.	180	P4-3	.
CCD029	119.9166667	.	250.8333333	.	0	180	P4-3	0
CCD029	120	180	.	1080	.	180	P4-3	.
CCD029	132	180	.	1080	.	180	P4-3	.
CCD029	144	180	.	1080	.	180	P4-3	.
CCD029	156	180	.	1080	.	180	P4-3	.
CCD029	167.9166667	.	299.1666667	.	0	180	P4-3	0
CCD029	168	180	.	1080	.	180	P4-3	.
CCD029	180	180	.	1080	.	180	P4-3	.
CCD029	192	180	.	1080	.	180	P4-3	.
CCD029	204	180	.	1080	.	180	P4-3	.
CCD029	216	180	.	1080	.	180	P4-3	.
CCD029	228	180	.	1080	.	180	P4-3	.
CCD029	239.9166667	.	200.8333333	.	0	180	P4-3	0
CCD029	240	180	.	1080	.	180	P4-3	.
CCD029	252	180	.	1080	.	180	P4-3	.
CCD029	264	180	.	1080	.	180	P4-3	.
CCD029	276	180	.	1080	.	180	P4-3	.
CCD029	287.9166667	.	143.3333333	.	0	180	P4-3	0
CCD029	288	180	.	1080	.	180	P4-3	.
CCD029	335.9166667	.	1	.	1	180	P4-3	0
CCD029	407.9166667	.	1	.	1	180	P4-3	0
